# Supplementary material for: Stereospecific assembly of tetrahydroquinolines via tandem ring-opening/oxidative cyclization of donor–acceptor cyclopropanes with N-alkyl anilines
Source: Royal Society of Chemistry journal article supplement (doi:10.1039/c9cc04042k), 2019-01-01

Supporting Information

**Stereospecific assembly of tetrahydroquinolines via tandem ring-opening/oxidative cyclization of donor-acceptor cyclopropanes with *N*-alkyl anilines**

Bijay Ketan Das, Sourav Pradhan and Tharmalingam Punniyamurthy\*

*Department of Chemistry, Indian Institute of Technology Guwahati, Guwahati 781039, India*

**Table of Contents**

|   |                                                                                                      |          |
|---|------------------------------------------------------------------------------------------------------|----------|
| 1 | General Information                                                                                  | S2       |
| 2 | General Procedure for the Synthesis of Tetrahydroquinolines                                          | S2       |
| 3 | Procedure for the Enantiospecific Synthesis of Tetrahydroquinolines                                  | S3       |
| 4 | Crystal Structure and Data of <b>4d</b> and <b>4p'</b>                                               | S3-S5    |
| 5 | ESI-MS of the reaction of <b>1a</b> and <b>2a</b> in the presence of BHT after 4 h                   | S6       |
| 6 | HPLC of the compounds <b>4a'</b> , <b>4p'</b> , <b>4r'</b> , <b>4u'</b> , <b>4z'</b> and <b>4ab'</b> | S7-S12   |
| 7 | Characterization Data                                                                                | S13-S30  |
| 8 | NMR ( <sup>1</sup> H, <sup>13</sup> C and <sup>19</sup> F) spectra                                   | S31-S105 |

**General Information.** Cu(OTf)<sub>2</sub> (98%), Cu(OAc)<sub>2</sub> (98%), CuCl<sub>2</sub> (97%) and CuBr<sub>2</sub> (99.9%) were purchased from Aldrich and used as received. Cyclopropanes<sup>1,2</sup> and *N*-alkyl anilines<sup>3</sup> were prepared according to the reported procedure. Column chromatography was performed with Rankem silica gel (60-120 mesh). Bruker Avance III 400 and Bruker Avance III 600 spectrometers were used for recording NMR spectra using CDCl<sub>3</sub> as a solvent and Me<sub>4</sub>Si as an internal standard. Chemical shifts ( $\delta$ ) and spin-spin coupling constants ( $J$ ) are reported in ppm and Hz, respectively, and other data are reported as follows: s = singlet, d = doublet, t = triplet, m = multiplet, q = quartet, dd = doublet of doublet and br s = broad singlet. Melting points were determined with a Büchi B-540 apparatus and are uncorrected. Optical rotation was determined using Perkin Elmer-343 Polarimeter. HPLC analysis was carried out with Waters-2489 instrument using Daicel Chiralcel AD-H column using *iso*-propanol and hexane as eluent. FT-IR spectra were collected on Thermo Fisher Scientific IR spectrometer. Q-ToF ESI-MS instrument (model HAB 273) was used for recording mass spectra. Single crystal X-ray data were collected using Bruker SMART APEX-II CCD diffractometer, which is equipped with 1.75 kW sealed-tube Mo-K $\alpha$  irradiation ( $\lambda = 0.71073$  Å) at 298(2) K. The crystal structure was solved by direct method using SHELXL-97 (Göttingen, Germany) and refined with full-matrix least squares on F<sup>2</sup> using SHELXL-97.

### **General Procedure for the Synthesis of Tetrahydroquinolines**

*N*-Alkyl aniline **1** (0.2 mmol), cyclopropane **2** (0.24 mmol) and Cu(OTf)<sub>2</sub> (0.02 mmol, 7.2 mg) were stirred at room temperature for 6 h. Then, K<sub>2</sub>CO<sub>3</sub> (0.2 mmol, 22 mg) and DMF (2 mL) were added and the resulting mixture was stirred at 100 °C for 12 h under air. The progress of the reaction was monitored using TLC with ethyl acetate and hexane as an eluent. After completion, the reaction mixture was cooled to room temperature and diluted with ethyl acetate (10 mL). The resultant mixture was washed with ice cold brine (5 mL) and cold water (5 mL). The aqueous solution was extracted with ethyl acetate (2 x 5 mL). Drying (Na<sub>2</sub>SO<sub>4</sub>) and evaporation of the solvent gave a residue that was purified on a silica gel column chromatography using hexane and ethyl acetate as an eluent to give analytically pure tetrahydroquinoline scaffolds.

## Procedure for the Enantiospecific Synthesis of Tetrahydroquinolines

*N*-Alkyl aniline **1** (0.2 mmol), chiral cyclopropane (*R*)-**2a'** (0.24 mmol) and Cu(OTf)<sub>2</sub> (0.02 mmol, 7.2 mg) were subjected to the above described general procedure for the tetrahydroquinoline synthesis. The enantiomeric excess was determined using chiral HPLC.

## Crystal Data and Structure Refinement

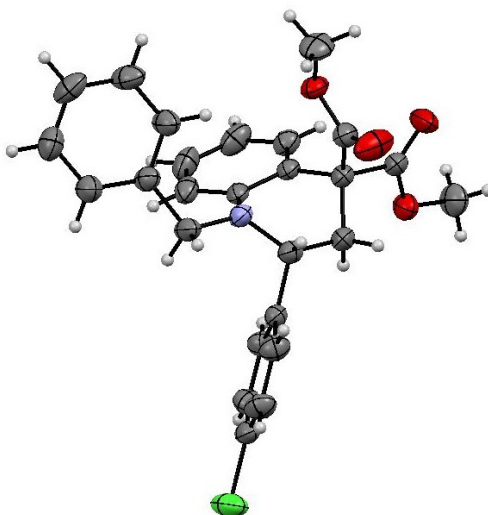

**Figure S1.** ORTEP diagram of dimethyl 1-benzyl-2-(4-chlorophenyl)-2,3-dihydroquinoline-4,4(1*H*)-dicarboxylate **4d** with 50% ellipsoid (CCDC 1902908).

|                               |                                                                                                          |
|-------------------------------|----------------------------------------------------------------------------------------------------------|
| Identification code           | <b>4d</b>                                                                                                |
| Empirical formula             | C <sub>26</sub> H <sub>24</sub> ClNO <sub>4</sub>                                                        |
| Formula weight                | 449.91                                                                                                   |
| Crystal habit, colour         | block /Colorless                                                                                         |
| Crystal size, mm <sup>3</sup> | 0.4 x 0.3 x 0.2                                                                                          |
| Temperature, <i>T</i> /K      | 296 K                                                                                                    |
| Wavelength, λ/Å               | 0.71073                                                                                                  |
| Crystal system                | 'Triclinic'                                                                                              |
| Space group                   | 'P -1'                                                                                                   |
| Unit cell dimensions          | a = 9.8937(9)Å<br>b = 11.1906(10)Å<br>c = 11.7431(8)Å<br>α = 68.403(7)<br>β = 71.507(7)<br>γ = 82.528(7) |
| Volume, V/Å <sup>3</sup>      | 1146.32(18)                                                                                              |

|                                                     |                                                               |
|-----------------------------------------------------|---------------------------------------------------------------|
| Z                                                   | 2                                                             |
| Calculated density, Mg·m <sup>-3</sup>              | 1.303                                                         |
| Absorption coefficient, $\mu/\text{mm}^{-1}$        | 0.199                                                         |
| <i>F</i> (000)                                      | 472                                                           |
| $\theta$ range for data collection                  | 2.23 to 25°                                                   |
| Limiting indices                                    | -11 ≤ <i>h</i> ≤ 11, -13 ≤ <i>k</i> ≤ 13, -13 ≤ <i>l</i> ≤ 13 |
| Reflection collected / unique                       | 4056/2736                                                     |
| Completeness to $\theta$                            | 99.90% ( $\theta = 25^\circ$ )                                |
| Absorption correction                               | Multi-scan                                                    |
| Max. and min. transmission                          | 1.000 and 0.867                                               |
| Refinement method                                   | 'SHELXL-2014/7 (Sheldrick, 2014)'                             |
| Data / restraints / parameters                      | 4056/0/ 291                                                   |
| Goodness-of-fit on <i>F</i> <sup>2</sup>            | 1.070                                                         |
| Final <i>R</i> indices [ <i>I</i> > 2σ( <i>I</i> )] | <i>R</i> 1 = 0.0521, <i>wR</i> 2 = 0.1084                     |
| <i>R</i> indices (all data)                         | <i>R</i> 1 = 0.0833, <i>wR</i> 2 = 0.1386                     |

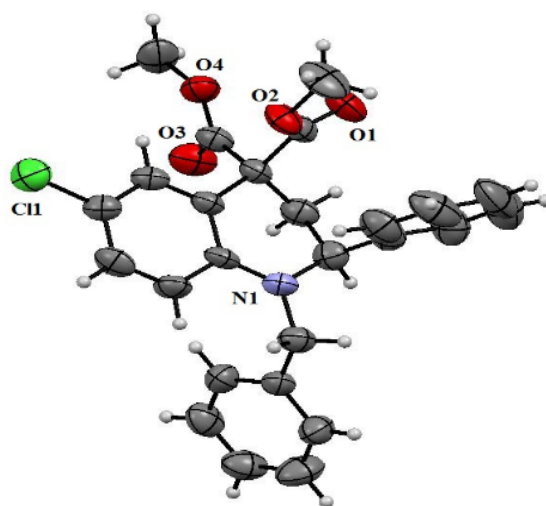

**Figure S2.** ORTEP diagram of dimethyl (*S*)-1-benzyl-6-chloro-2-phenyl-2,3-dihydroquinoline-4,4(*1H*)-dicarboxylate **4p'** with 50% ellipsoid (CCDC 1902927).

|                                  |                                                   |
|----------------------------------|---------------------------------------------------|
| Identification code              | <b>4p'</b>                                        |
| Empirical formula                | C <sub>26</sub> H <sub>24</sub> ClNO <sub>4</sub> |
| Formula weight                   | 449.91                                            |
| Crystal habit, colour            | block /colorless                                  |
| Crystal size, mm <sup>3</sup>    | 0.4 x 0.3 x 0.2                                   |
| Temperature, <i>T</i> /K         | 296 K                                             |
| Wavelength, $\lambda/\text{\AA}$ | 0.71073                                           |

|                                            |                                                                                               |
|--------------------------------------------|-----------------------------------------------------------------------------------------------|
| Crystal system                             | 'monoclinic'                                                                                  |
| Space group                                | 'P 21'                                                                                        |
| Unit cell dimensions                       | a = 10.5583(10)Å<br>b = 9.7573(7)Å<br>c = 11.7032(11)Å<br>α = 90<br>β = 106.984(11)<br>γ = 90 |
| Volume, V/Å <sup>3</sup>                   | 1153.09(19)                                                                                   |
| Z                                          | 2                                                                                             |
| Calculated density, Mg·m <sup>-3</sup>     | 1.296                                                                                         |
| Absorption coefficient, μ/mm <sup>-1</sup> | 0.198                                                                                         |
| F(000)                                     | 472                                                                                           |
| θ range for data collection                | 2.28 to 28°                                                                                   |
| Limiting indices                           | -14 ≤ h ≤ 10, -12 ≤ k ≤ 7, -8 ≤ l ≤ 15                                                        |
| Reflection collected / unique              | 3728/2194                                                                                     |
| Completeness to θ                          | 99.90% (θ = 28°)                                                                              |
| Absorption correction                      | Multi-scan                                                                                    |
| Max. and min. transmission                 | 1.000 and 0.768                                                                               |
| Refinement method                          | 'SHELXT 2018/2 (Sheldrick, 2018)'                                                             |
| Data / restraints / parameters             | 3728/1/ 291                                                                                   |
| Goodness-of-fit on F <sup>2</sup>          | 1.031                                                                                         |
| Final R indices [I > 2σ(I)]                | R1 = 0.0713, wR2 = 0.1584                                                                     |
| R indices (all data)                       | R1 = 0.1065, wR2 = 0.1989                                                                     |

ESI-MS of the reaction of mixture of 1a and 2a in the presence of BHT after 4 h

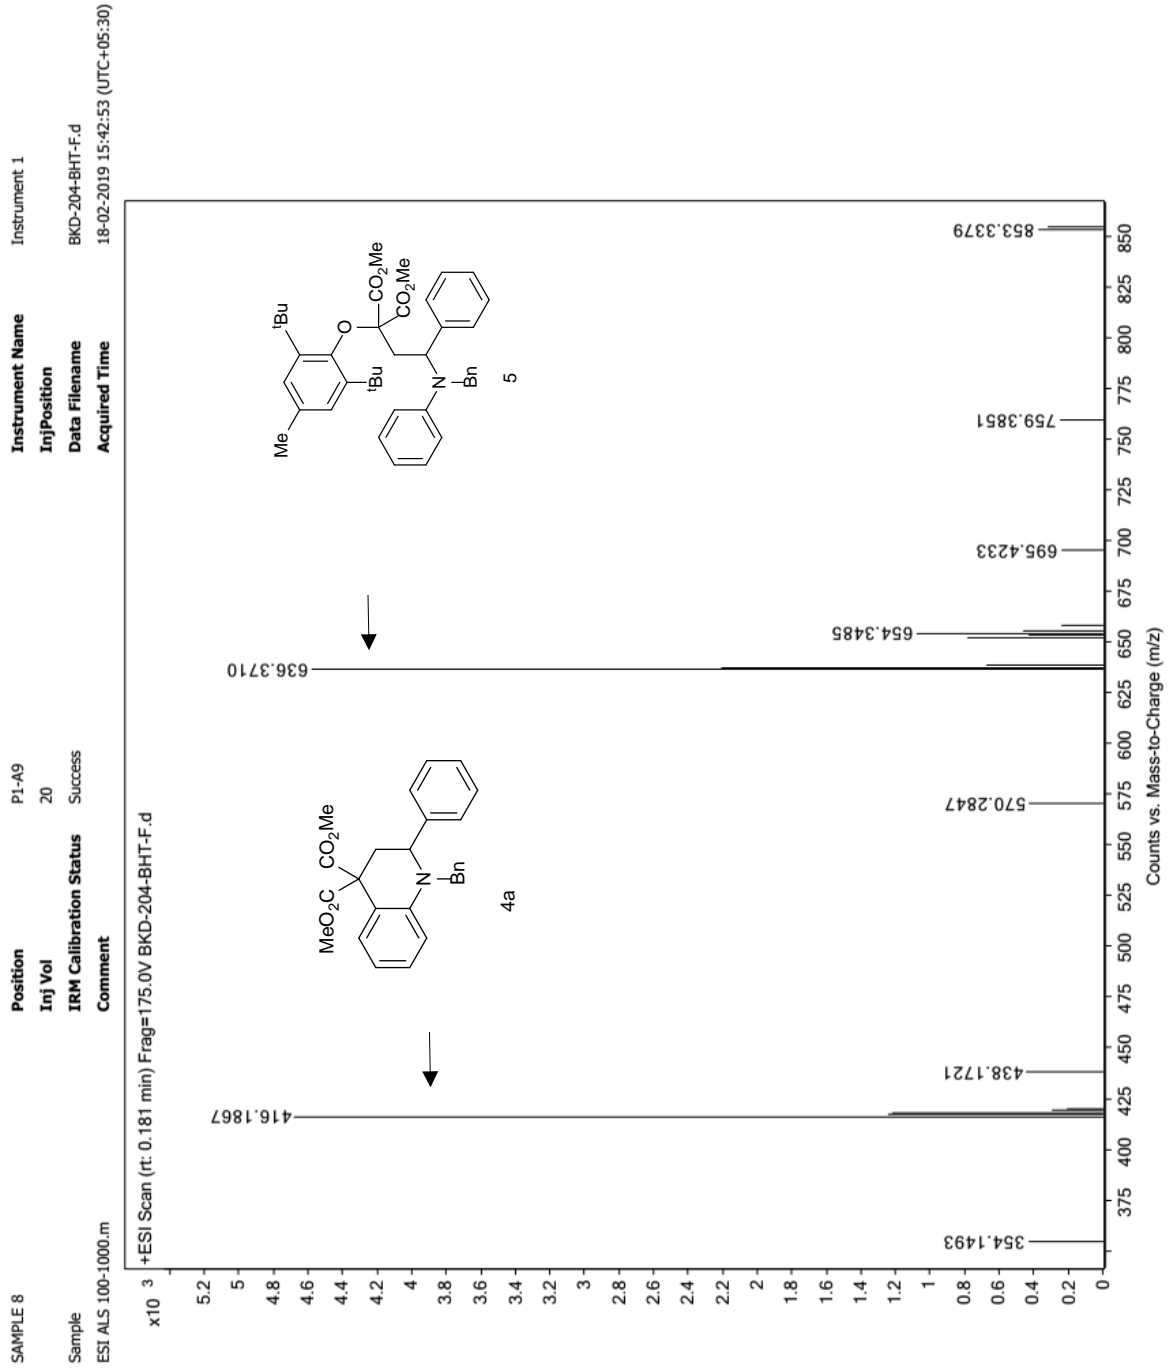

## HPLC chromatograms

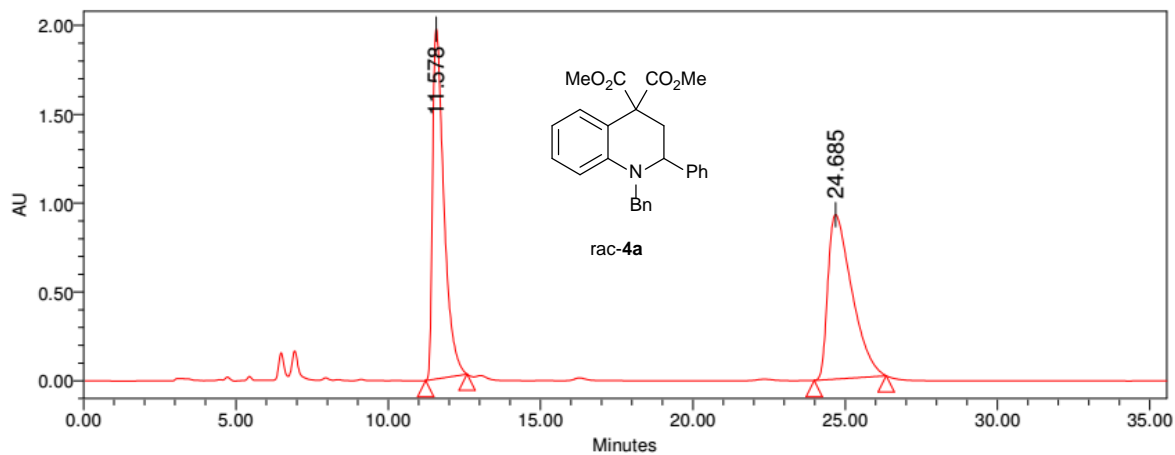

### Peak Results

|   | RT     | Height (μV) | % Area |
|---|--------|-------------|--------|
| 1 | 11.578 | 1970222     | 49.96  |
| 2 | 24.685 | 924902      | 50.04  |

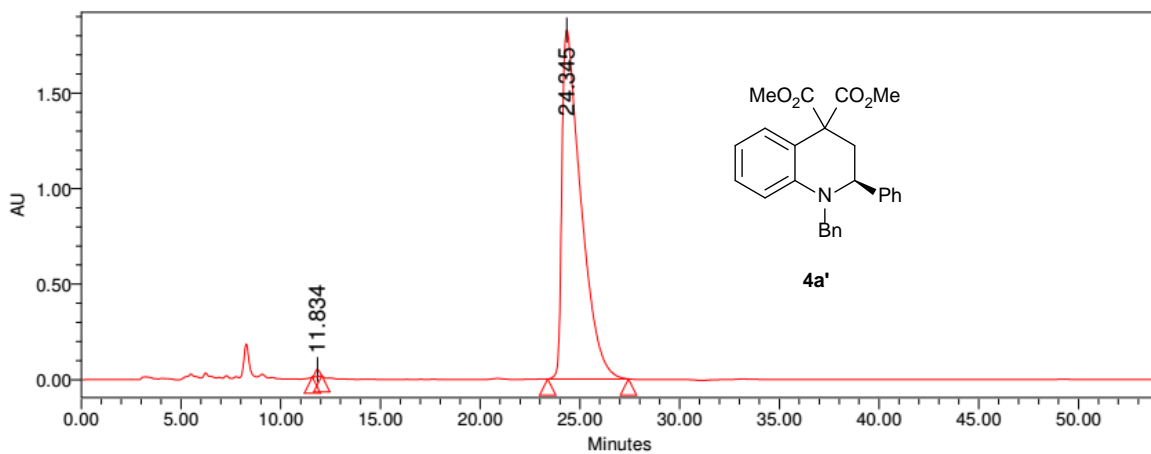

### Peak Results

|   | RT     | Height (μV) | % Area |
|---|--------|-------------|--------|
| 1 | 11.834 | 36313       | 0.46   |
| 2 | 24.345 | 1827164     | 99.54  |

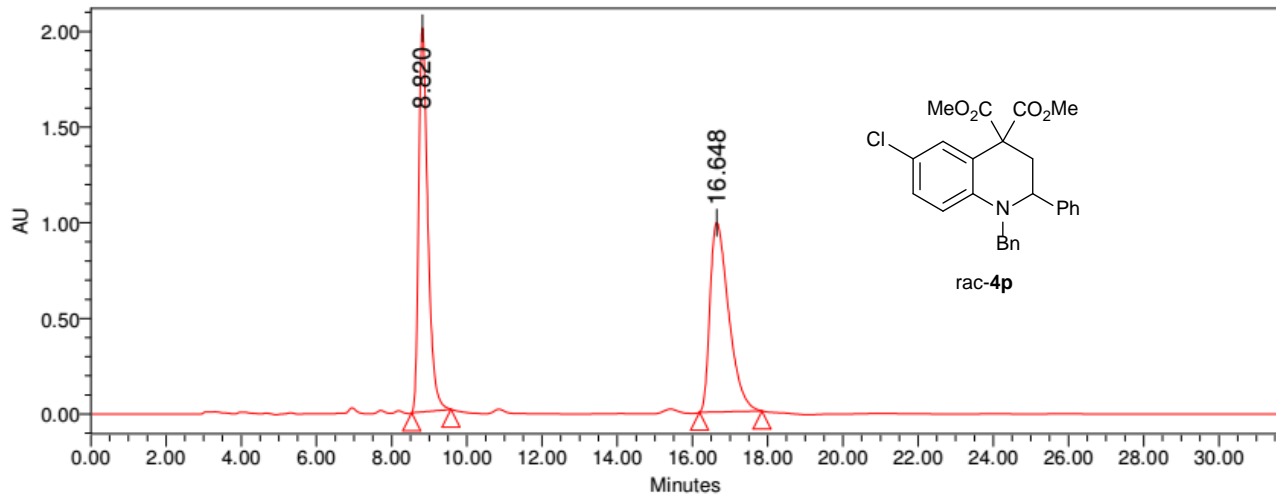

### Peak Results

|   | RT     | Height (μV) | % Area |
|---|--------|-------------|--------|
| 1 | 8.820  | 2008296     | 49.82  |
| 2 | 16.648 | 989772      | 50.18  |

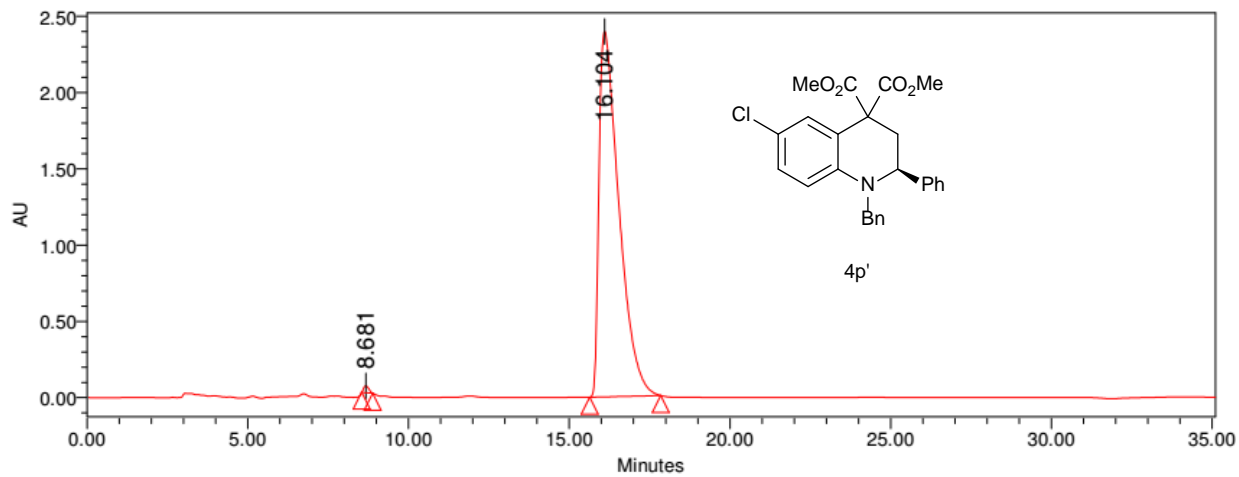

### Peak Results

|   | RT     | Height (μV) | % Area |
|---|--------|-------------|--------|
| 1 | 8.681  | 44552       | 0.47   |
| 2 | 16.104 | 2396437     | 99.53  |



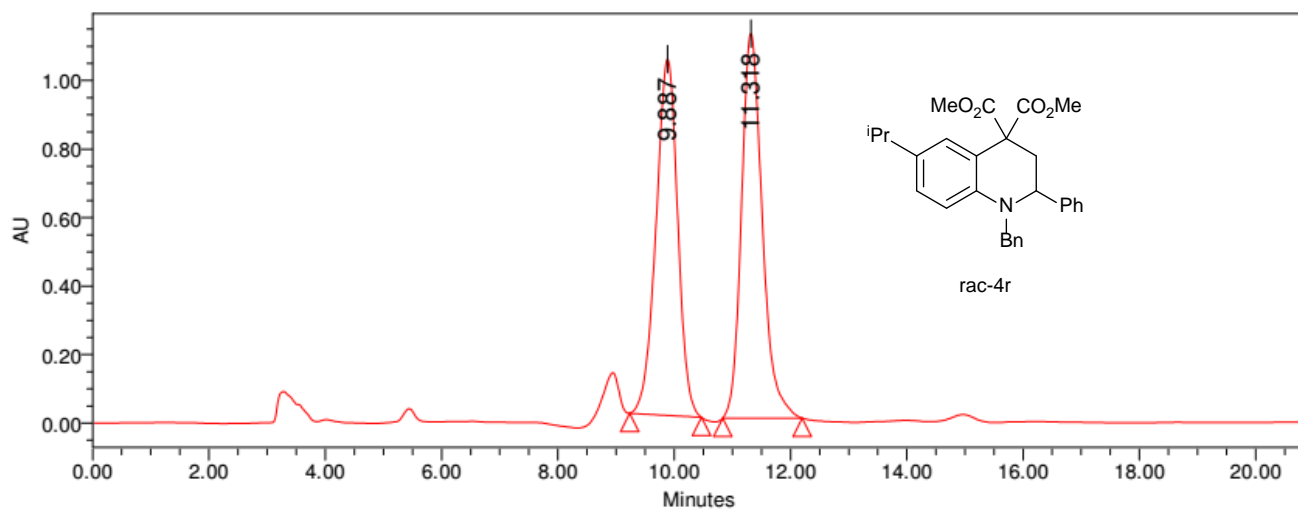

### Peak Results

|   | RT     | Height (μV) | % Area |
|---|--------|-------------|--------|
| 1 | 9.887  | 1040759     | 49.11  |
| 2 | 11.318 | 1123176     | 50.89  |

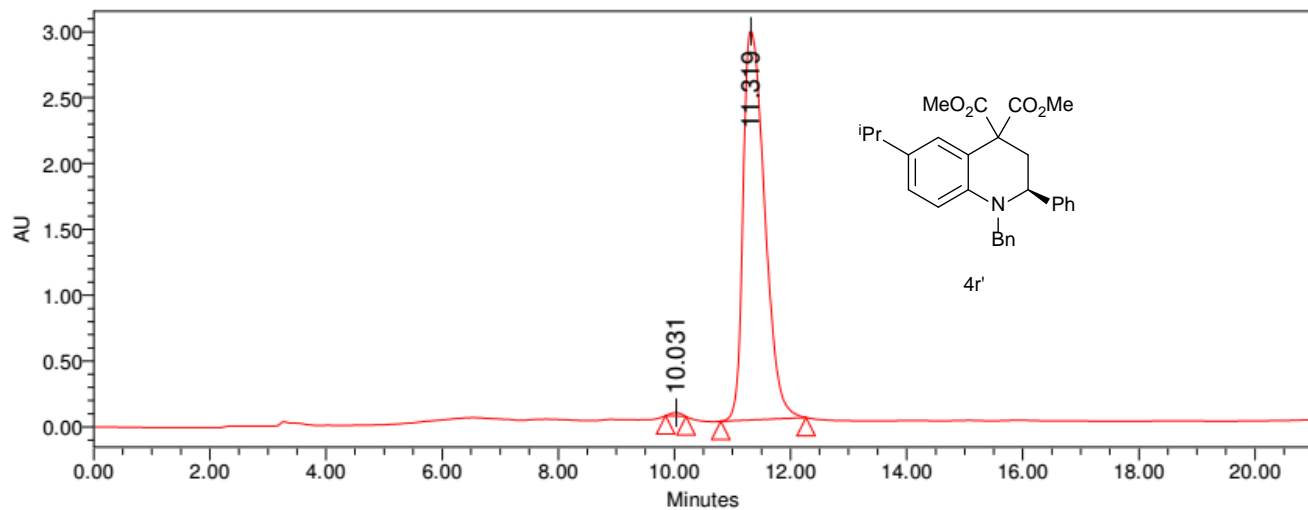

### Peak Results

|   | RT     | Height (μV) | % Area |
|---|--------|-------------|--------|
| 1 | 10.031 | 26543       | 0.45   |
| 2 | 11.319 | 2952909     | 99.55  |

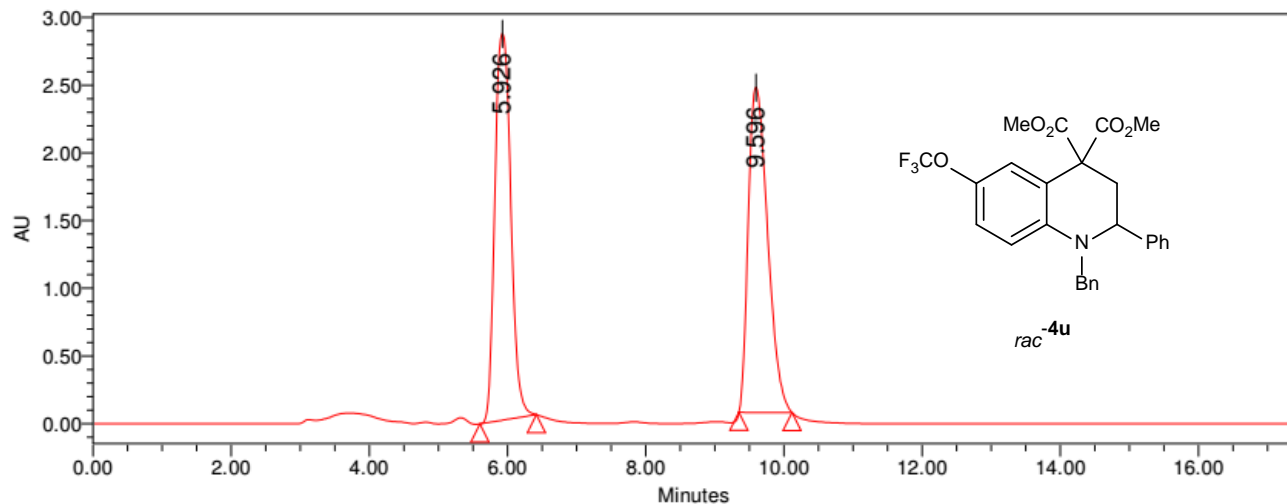

### Peak Results

|   | RT    | Height (μV) | % Area |
|---|-------|-------------|--------|
| 1 | 5.926 | 2860023     | 49.53  |
| 2 | 9.596 | 2400387     | 50.47  |

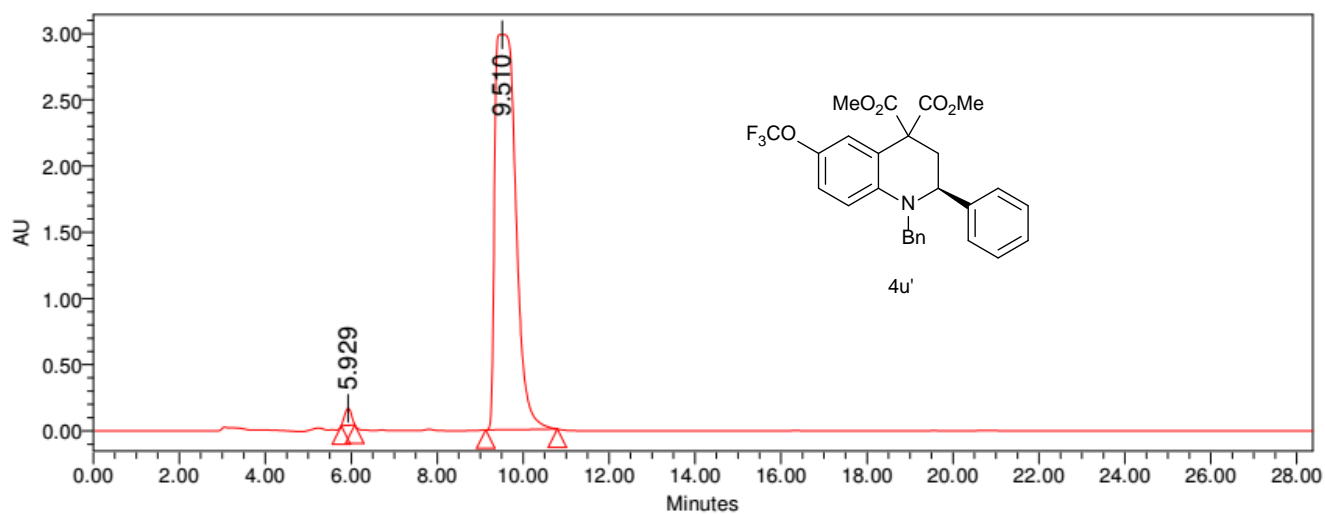

### Peak Results

|   | RT    | Height (μV) | % Area |
|---|-------|-------------|--------|
| 1 | 5.929 | 129262      | 1.36   |
| 2 | 9.510 | 2984269     | 98.64  |

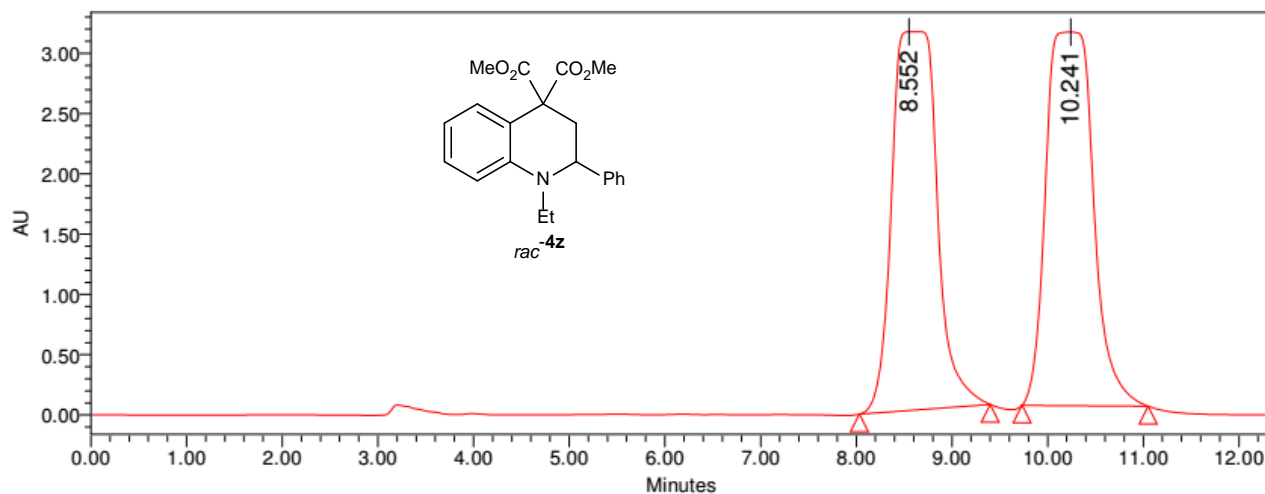

### Peak Results

|   | RT     | Height (μV) | % Area |
|---|--------|-------------|--------|
| 1 | 8.552  | 3141971     | 49.13  |
| 2 | 10.241 | 3098548     | 50.87  |

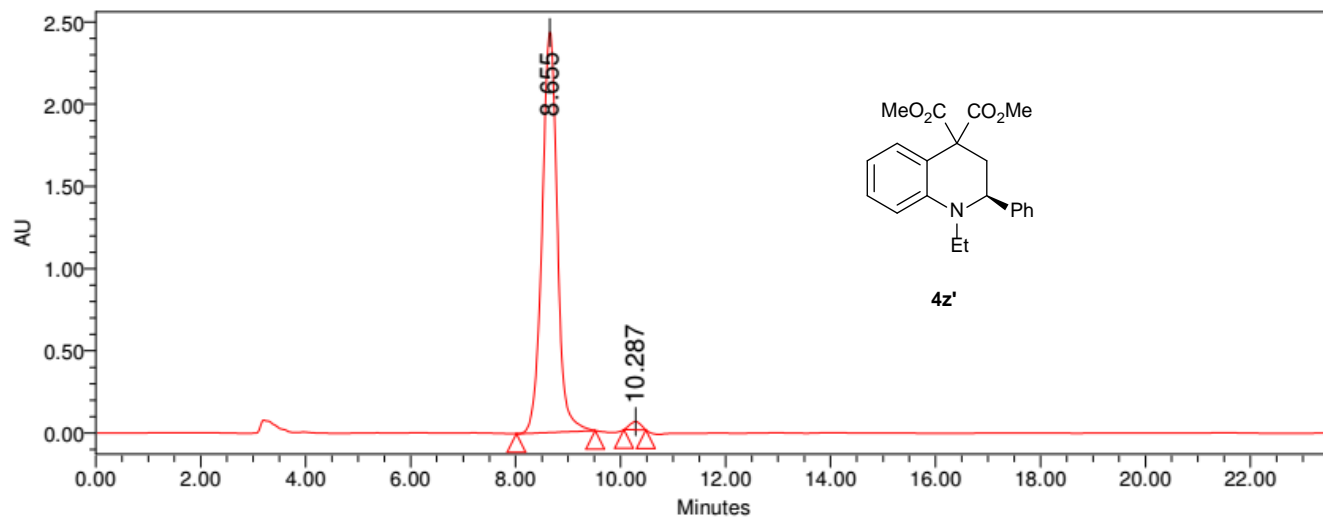

### Peak Results

|   | RT     | Height (μV) | % Area |
|---|--------|-------------|--------|
| 1 | 8.655  | 2436560     | 98.54  |
| 2 | 10.287 | 50203       | 1.46   |

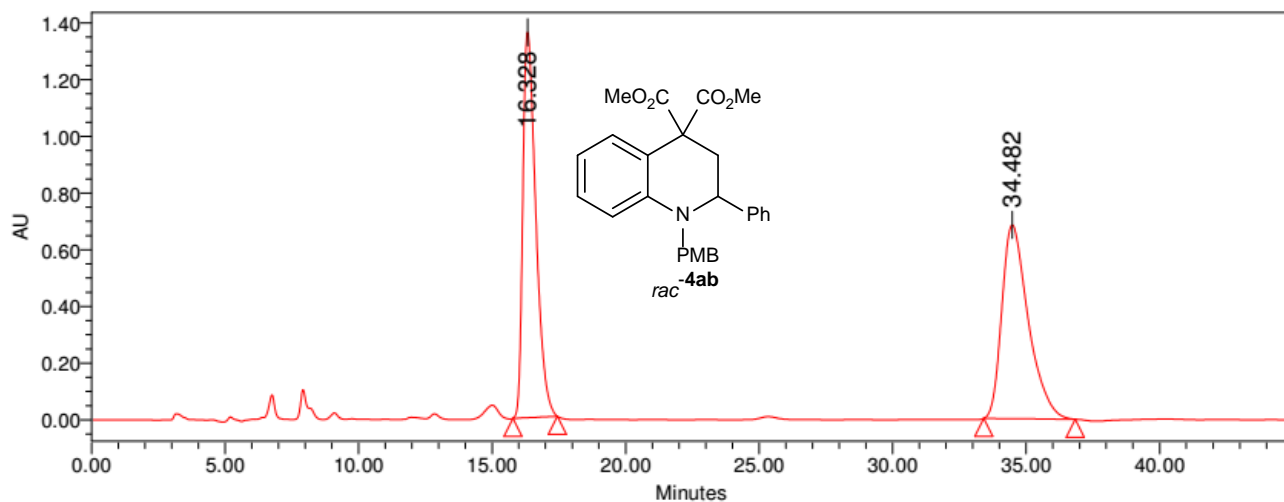

### Peak Results

|   | RT     | Height (μV) | % Area |
|---|--------|-------------|--------|
| 1 | 16.328 | 1360558     | 49.21  |
| 2 | 34.482 | 683393      | 50.79  |

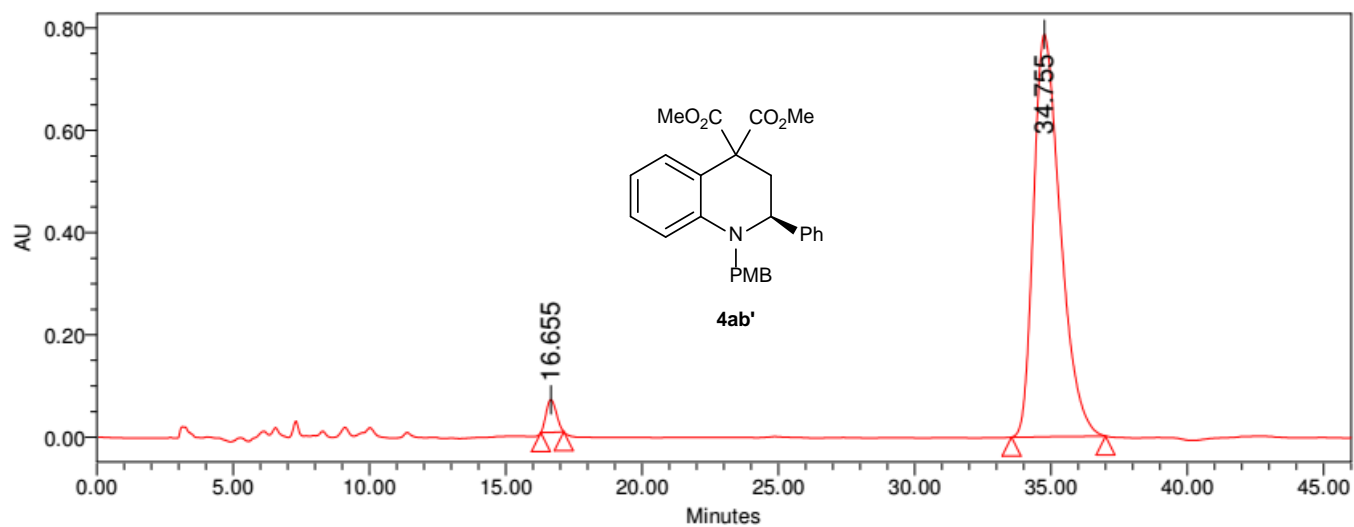

### Peak Results

|   | RT     | Height (μV) | % Area |
|---|--------|-------------|--------|
| 1 | 16.655 | 63704       | 2.98   |
| 2 | 34.755 | 787287      | 97.02  |

## Characterization Data

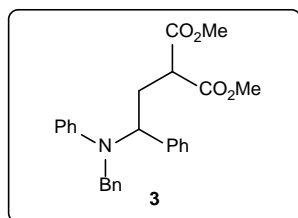

### Dimethyl 2-(2-(benzyl(phenyl)amino)-2-phenylethyl) malonate **3**.

Analytical TLC on silica gel, 1:9 ethyl acetate/hexane  $R_f = 0.42$ ; thick liquid;  $^1\text{H NMR}$  (600 MHz,  $\text{CDCl}_3$ )  $\delta$  7.42-7.34 (m, 5H), 7.32-7.23 (m, 7H), 6.95 (d,  $J = 8.4$  Hz, 2H), 6.86 (t,  $J = 7.2$  Hz, 1H), 5.26 (t,  $J = 7.8$ , 1H), 4.43 (d,  $J = 16.8$  Hz, 1H), 4.35 (d,  $J = 16.8$  Hz, 1H), 3.81 (s, 3H), 3.76 (s, 3H), 3.76-3.74 (m, 1H), 2.77-2.69 (m, 2H);  $^{13}\text{C NMR}$  (150 MHz,  $\text{CDCl}_3$ )  $\delta$  169.9, 169.8, 149.4, 139.5, 139.2, 129.2, 128.7, 128.5, 127.9, 127.7, 127.0, 126.6, 118.7, 116.2, 52.8, 52.8, 50.0, 49.1, 31.1; FT-IR (neat) 3061, 3029, 2953, 2847, 1731, 1628, 1598, 1501, 1452, 1436, 1265, 1223, 1155, 1064, 751, 697  $\text{cm}^{-1}$ ; HRMS (ESI)  $m/z$   $[\text{M}+\text{H}]^+$  calcd for  $\text{C}_{26}\text{H}_{28}\text{NO}_4$ : 418.2013 found: 418.2011.

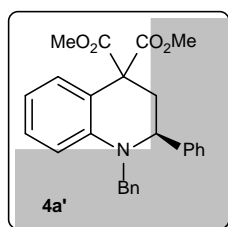

### (S)-Dimethyl 1-benzyl-2-phenyl-2,3-dihydroquinoline-4,4(1H)-dicarboxylate **4a'**.

Analytical TLC on silica gel, 1:9 ethyl acetate/hexane  $R_f = 0.43$ ; sticky liquid; yield 81% (67 mg);  $^1\text{H NMR}$  (600 MHz,  $\text{CDCl}_3$ )  $\delta$  7.22-7.03 (m, 10H), 7.01 (d,  $J = 7.8$  Hz, 2H), 6.66-6.64 (m, 2H), 4.58 (d,  $J = 16.8$  Hz, 1H), 4.47-4.45 (m, 1H), 3.98 (d,  $J = 16.8$  Hz, 1H), 3.68 (s, 3H), 3.45 (s, 3H), 2.90-2.87 (m, 1H), 2.64-2.60 (m, 1H);  $^{13}\text{C NMR}$  (150 MHz,  $\text{CDCl}_3$ )  $\delta$  171.7, 171.3, 145.0, 141.9, 138.1, 129.5, 129.0, 128.7, 128.5, 127.6, 127.4, 127.09, 127.01, 119.8, 117.0, 113.5, 59.1, 57.1, 53.2, 52.8, 52.7, 38.3; FT-IR (neat) 3062, 3028, 2952, 1733, 1602, 1495, 1451, 1240, 1099  $\text{cm}^{-1}$ ; HRMS (ESI)  $m/z$   $[\text{M}+\text{H}]^+$  calcd for  $\text{C}_{26}\text{H}_{26}\text{NO}_4$ : 416.1856, found: 416.1860;  $[\alpha]_{\text{D}}^{25} = +42.00$  ( $c = 0.1$ ,  $\text{CHCl}_3$ ); HPLC: >99% ee [CHIRALCEL AD-H, hexane/ $i$ PrOH = 90:10, flow rate: 1 mL /min,  $\lambda = 254$  nm,  $t_{\text{R}} = 24.34$  min (major), 11.83 min (minor)].

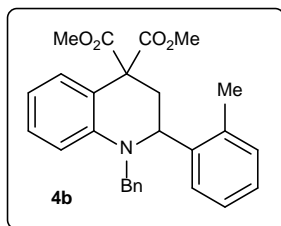

**Dimethyl 1-benzyl-2-(*o*-tolyl)-2,3-dihydroquinoline-4,4(1*H*)-dicarb-**

**oxylate 4b.** Analytical TLC on silica gel, 1:9 ethyl acetate/hexane  $R_f = 0.42$ ; sticky liquid; yield 67% (56 mg);  $^1\text{H NMR}$  (600 MHz,  $\text{CDCl}_3$ )  $\delta$  7.17-7.09 (m, 5H), 7.07-7.02 (m, 4H), 6.96 (d,  $J = 7.8$  Hz, 2H), 6.73 (d,  $J = 8.4$  Hz, 1H), 6.66 (t,  $J = 7.8$ , 1H), 4.62-4.58 (m, 2H), 3.92 (d,  $J = 16.2$  Hz, 1H), 3.67 (s, 3H), 3.47 (s, 3H), 2.80 (dd,  $J = 13.8, 4.8$  Hz, 1H), 2.51 (dd,  $J = 13.8, 9.0$  Hz, 1H), 2.07 (s, 3H);  $^{13}\text{C NMR}$  (150 MHz,  $\text{CDCl}_3$ )  $\delta$  171.7, 171.4, 145.6, 139.7, 137.9, 135.9, 130.83, 130.81, 129.5, 129.1, 128.6, 127.4, 127.3, 127.1, 126.4, 119.8, 116.9, 113.6, 57.2, 53.2, 52.9, 52.8, 36.5, 18.8; FT-IR (neat) 3027, 2951, 1734, 1602, 1495, 1453, 1240, 1135, 1101, 1025, 748, 699  $\text{cm}^{-1}$ ; HRMS (ESI)  $m/z$   $[\text{M}+\text{H}]^+$  calcd for  $\text{C}_{27}\text{H}_{28}\text{NO}_4$ : 430.2013, found: 430.2014.

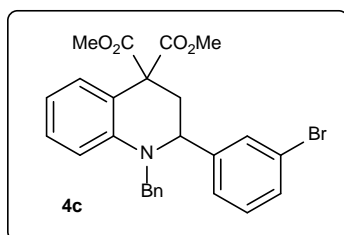

**Dimethyl 1-benzyl-2-(3-bromophenyl)-2,3-dihydroquinoline-**

**4,4(1*H*)-dicarboxylate 4c.** Analytical TLC on silica gel, 1:9 ethyl acetate/hexane  $R_f = 0.43$ ; sticky liquid; yield 76% (75 mg);  $^1\text{H NMR}$  (400 MHz,  $\text{CDCl}_3$ )  $\delta$  7.31-7.27 (m, 2H), 7.19-7.02 (m, 7H), 7.00-6.97 (m, 2H), 6.72-6.65 (m, 2H), 4.61 (d,  $J = 16.4$  Hz, 1H), 4.42-4.38 (m, 1H), 3.96 (d,  $J = 16.4$  Hz, 1H), 3.67 (s, 3H), 3.53 (s, 3H), 2.85 (dd,  $J = 13.6, 5.2$  Hz, 1H), 2.55 (dd,  $J = 13.6, 9.2$  Hz, 1H);  $^{13}\text{C NMR}$  (100 MHz,  $\text{CDCl}_3$ )  $\delta$  171.5, 171.2, 144.9, 144.7, 137.8, 130.9, 130.5, 130.3, 129.6, 129.1, 128.6, 127.25, 127.22, 126.1, 122.8, 120.0, 117.5, 113.8, 58.7, 57.1, 53.2, 52.9, 38.3; FT-IR (neat) 3028, 2951, 2924, 2853, 1733, 1601, 1572, 1496, 1450, 1434, 1342, 1240, 1067, 1026, 749, 697  $\text{cm}^{-1}$ ; HRMS (ESI)  $m/z$   $[\text{M}+\text{H}]^+$  calcd for  $\text{C}_{26}\text{H}_{25}\text{BrNO}_4$ : 494.0961, found: 494.0962.

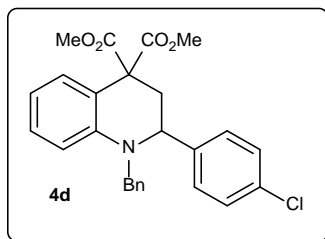

**Dimethyl 1-benzyl-2-(4-chlorophenyl)-2,3-dihydroquinoline-**

**4,4(1H)-dicarboxylate 4d.** Analytical TLC on silica gel, 1:9 ethyl acetate/hexane  $R_f = 0.46$ ; colorless crystal; mp 122-123 °C; yield 75% (67 mg);  $^1\text{H}$  NMR (400 MHz,  $\text{CDCl}_3$ )  $\delta$  7.27-7.05 (m, 11H), 6.76-6.73 (m, 2H), 4.65 (d,  $J = 16.4$  Hz, 1H), 4.50-4.47(m, 1H), 4.01 (d,  $J = 16.4$  Hz, 1H), 3.75 (s, 3H), 3.57 (s, 3H), 2.93 (dd,  $J = 13.6, 5.2$  Hz, 1H), 2.62 (dd,  $J = 13.6, 8.2$  Hz, 1H);  $^{13}\text{C}$  NMR (100 MHz,  $\text{CDCl}_3$ )  $\delta$  171.5, 171.3, 145.0, 140.6, 137.8, 133.4, 129.6, 129.1, 128.93, 128.91, 128.6, 127.23, 127.20, 120.0, 117.4, 113.7, 58.5, 57.1, 53.2, 52.95, 52.90, 38.4; FT-IR (KBr) 3028, 2951, 1733, 1601, 1575, 1495, 1493, 1450, 1343, 1240, 1089, 1014, 937, 835, 751, 699  $\text{cm}^{-1}$ ; HRMS (ESI)  $m/z$   $[\text{M}+\text{H}]^+$  calcd for  $\text{C}_{26}\text{H}_{25}\text{ClNO}_4$ : 450.1467, found: 450.1468.

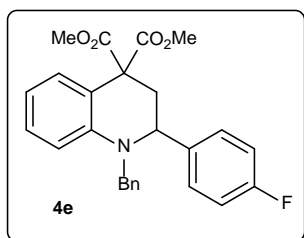

**Dimethyl 1-benzyl-2-(4-fluorophenyl)-2,3-dihydroquinoline-4,4(1H)-**

**dicarboxylate 4e.** Analytical TLC on silica gel, 1:9 ethyl acetate/hexane  $R_f = 0.36$ ; sticky liquid; yield 74% (64 mg);  $^1\text{H}$  NMR (400 MHz,  $\text{CDCl}_3$ )  $\delta$  7.18-7.04 (m, 7H), 7.00-6.97 (m, 2H), 6.90-6.86 (m, 2H), 6.68-6.64 (m, 2H), 4.57 (d,  $J = 16.8$  Hz, 1H), 4.44-4.40 (m, 1H), 3.95 (d,  $J = 16.8$  Hz, 1H), 3.67 (s, 3H), 3.51 (s, 3H), 2.86 (dd,  $J = 13.6, 5.2$  Hz, 1H), 2.56 (dd,  $J = 13.6, 9.2$  Hz, 1H);  $^{13}\text{C}$  NMR (150 MHz,  $\text{CDCl}_3$ )  $\delta$  171.6, 171.3, 163.1 ( $J_{\text{C-F}} = 244.2$  Hz), 145.0, 138.0, 137.7 ( $J_{\text{C-F}} = 3.1$  Hz), 129.6, 129.15, 129.13 ( $J_{\text{C-F}} = 7.8$  Hz), 128.6, 127.18, 127.14, 119.9, 117.3, 115.6 ( $J_{\text{C-F}} = 21.3$  Hz), 113.7, 58.5, 57.2, 53.2, 52.9, 52.8, 38.5;  $^{19}\text{F}$  NMR (377 MHz,  $\text{CDCl}_3$ )  $\delta$  -114.91; FT-IR (neat) 3030, 2952, 2922, 2852, 1733, 1644, 1602, 1502, 1451, 1345, 1235, 1161, 1100, 1059, 841, 749, 699  $\text{cm}^{-1}$ ; HRMS (ESI)  $m/z$   $[\text{M}+\text{H}]^+$  calcd for  $\text{C}_{26}\text{H}_{25}\text{FNO}_4$ : 434.1762, found: 434.1763.

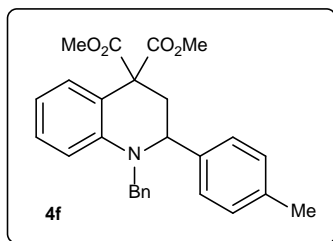

**Dimethyl 1-benzyl-2-(*p*-tolyl)-2,3-dihydroquinoline-4,4(1*H*)-**

**dicarboxylate 4f.** Analytical TLC on silica gel, 1:9 ethyl acetate/hexane  $R_f = 0.47$ ; sticky liquid; yield 68% (58 mg);  $^1\text{H NMR}$  (400 MHz,  $\text{CDCl}_3$ )  $\delta$  7.18-6.98 (m, 11H), 6.66-6.62 (m, 2H), 4.57 (d,  $J = 16.8$  Hz, 1H), 4.43-4.39 (m, 1H), 3.98 (d,  $J = 16.8$  Hz, 1H), 3.67 (s, 3H), 3.49 (s, 3H), 2.87-2.83 (m, 1H), 2.61-2.55 (m, 1H), 2.24 (s, 3H);  $^{13}\text{C NMR}$  (100 MHz,  $\text{CDCl}_3$ )  $\delta$  171.7, 171.4, 145.2, 139.0, 138.2, 137.3, 129.49, 129.42, 129.0, 128.5, 127.4, 127.1, 126.9, 120.0, 117.0, 113.6, 59.0, 57.3, 53.1, 52.8, 52.6, 38.6, 21.2; FT-IR (neat) 3025, 2952, 2923, 2853, 1733, 1602, 1496, 1451, 1346, 1240, 1126, 1103, 1026, 824, 753, 699, 667  $\text{cm}^{-1}$ ; HRMS (ESI)  $m/z$   $[\text{M}+\text{H}]^+$  calcd for  $\text{C}_{27}\text{H}_{28}\text{NO}_4$ : 430.2013, found: 430.2014.

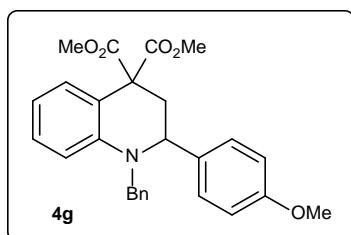

**Dimethyl 1-benzyl-2-(4-methoxyphenyl)-2,3-dihydroquinoline-**

**4,4(1*H*)-dicarboxylate 4g.** Analytical TLC on silica gel, 1:9 ethyl acetate/hexane  $R_f = 0.50$ ; brown sticky liquid; yield 62% (60 mg);  $^1\text{H NMR}$  (400 MHz,  $\text{CDCl}_3$ )  $\delta$  7.18-6.99 (m, 9H), 6.75-6.73 (m, 2H), 6.67-6.63 (m, 2H), 4.56 (d,  $J = 16.8$  Hz, 1H), 4.41-4.37 (m, 1H), 3.98 (d,  $J = 16.8$  Hz, 1H), 3.70 (s, 3H), 3.68 (s, 3H), 3.52 (s, 3H), 2.85 (dd,  $J = 13.6, 4.8$  Hz, 1H), 2.58 (dd,  $J = 13.6, 9.2$  Hz, 1H);  $^{13}\text{C NMR}$  (100 MHz,  $\text{CDCl}_3$ )  $\delta$  171.7, 171.5, 159.1, 145.3, 138.3, 133.9, 129.5, 129.1, 128.6, 128.5, 127.1, 126.9, 119.9, 117.0, 114.1, 113.6, 58.6, 57.3, 55.5, 53.2, 52.9, 52.6, 38.6; FT-IR (neat) 3027, 2952, 2849, 1733, 1603, 1509, 1451, 1302, 1245, 1173, 1030, 836, 751, 699  $\text{cm}^{-1}$ ; HRMS (ESI)  $m/z$   $[\text{M}+\text{H}]^+$  calcd for  $\text{C}_{27}\text{H}_{28}\text{NO}_5$ : 446.1962, found: 481. 446.1985.



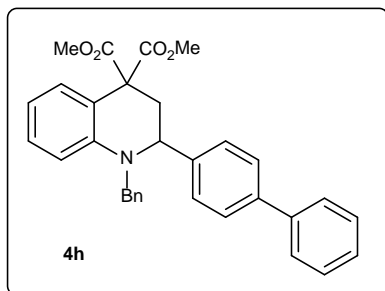

**Dimethyl 2-([1,1'-biphenyl]-4-yl)-1-benzyl-2,3-dihydroquinoline-4,4(1H)-dicarboxylate 3h.** Analytical TLC on silica gel, 1:9 ethyl acetate/hexane  $R_f = 0.41$ ; sticky liquid; yield 73% (71 mg);  $^1\text{H NMR}$  (400 MHz,  $\text{CDCl}_3$ )  $\delta$  7.58-7.51 (m, 4H), 7.45-7.41 (m, 2H), 7.36-7.32 (m, 1H), 7.28-7.10 (m, 9H), 6.78-6.72 (m, 2H), 4.71 (d,  $J = 16.8$  Hz, 1H), 4.61-4.57 (m, 1H), 4.13 (d,  $J = 16.8$  Hz, 1H), 3.77 (s, 3H), 3.54 (s, 3H), 3.01 (dd,  $J = 13.6, 5.2$  Hz, 1H), 2.74 (dd,  $J = 13.6, 8.8$  Hz, 1H);  $^{13}\text{C NMR}$  (100 MHz,  $\text{CDCl}_3$ )  $\delta$  171.7, 171.4, 145.1, 141.1, 140.9, 140.6, 138.1, 129.5, 129.1, 129.0, 128.6, 127.9, 127.5, 127.4, 127.2, 127.2, 127.0, 119.9, 117.1, 113.6, 59.0, 57.2, 53.2, 52.8, 38.4; FT-IR (neat) 3027, 2951, 2852, 1733, 1601, 1495, 1450, 1347, 1103, 1026, 843, 698, 667  $\text{cm}^{-1}$ ; HRMS (ESI)  $m/z$   $[\text{M}+\text{H}]^+$  calcd for  $\text{C}_{32}\text{H}_{30}\text{NO}_4$ : 492.2169, found: 492.2170.

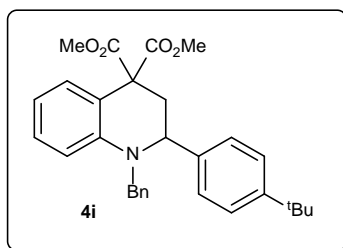

**Dimethyl 1-benzyl-2-(4-(tert-butyl)phenyl)-2,3-dihydroquinoline-4,4(1H)-dicarboxylate 3i.** Analytical TLC on silica gel, 1:9 ethyl acetate/hexane  $R_f = 0.56$ ; sticky liquid; yield 67% (63 mg);  $^1\text{H NMR}$  (400 MHz,  $\text{CDCl}_3$ )  $\delta$  7.22-7.01 (m, 11H), 6.65-6.62 (m, 2H), 4.57 (d,  $J = 16.8$  Hz, 1H), 4.48-4.44 (m, 1H), 4.02 (d,  $J = 16.8$  Hz, 1H), 3.67 (s, 3H), 3.40 (s, 3H), 2.89 (dd,  $J = 13.6, 5.2$  Hz, 1H), 2.64 (dd,  $J = 13.6, 8.4$  Hz, 1H), 1.21 (s, 9H);  $^{13}\text{C NMR}$  (100 MHz,  $\text{CDCl}_3$ )  $\delta$  171.7, 171.3, 150.4, 145.0, 138.7, 138.3, 129.4, 129.1, 128.5, 127.1, 127.0, 126.9, 125.5, 119.5, 116.9, 113.3, 58.9, 57.1, 53.1, 52.7, 38.1, 34.6, 31.5; FT-IR (neat) 3028, 2954, 2868, 1733, 1602, 1496, 1451, 1435, 1345, 1240, 1026, 839, 750, 697  $\text{cm}^{-1}$ ; HRMS (ESI)  $m/z$   $[\text{M}+\text{H}]^+$  calcd for  $\text{C}_{30}\text{H}_{34}\text{NO}_4$ : 472.2482, found: 472.2491.

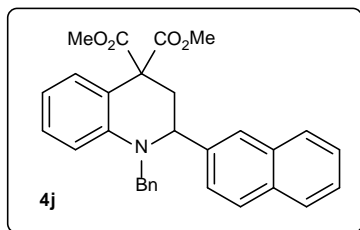

**Dimethyl 1-benzyl-2-(naphthalen-2-yl)-2,3-dihydroquinoline-**

**4,4(1H)-dicarboxylate 4j.** Analytical TLC on silica gel, 1:9 ethyl acetate/hexane  $R_f = 0.37$ ; semi solid; yield 71% (66 mg);  $^1\text{H NMR}$  (400 MHz,  $\text{CDCl}_3$ )  $\delta$  7.74-7.66 (m, 3H), 7.54 (s, 1H), 7.40-7.37 (m, 2H), 7.28-7.26 (m, 1H), 7.18-7.05 (m, 5H), 7.01-6.98 (m, 2H), 6.73-6.66 (m, 2H), 4.65-4.59 (m, 2H), 4.03 (d,  $J = 16.8$  Hz, 1H), 3.70 (s, 3H), 3.38 (s, 3H), 2.93 (dd,  $J = 13.6, 5.2$  Hz, 1H), 2.70 (dd,  $J = 13.6, 9.2$  Hz, 1H);  $^{13}\text{C NMR}$  (100 MHz,  $\text{CDCl}_3$ )  $\delta$  171.7, 171.4, 145.2, 139.5, 138.1, 133.4, 133.1, 129.6, 129.0, 128.7, 128.6, 128.0, 127.8, 127.2, 127.0, 126.6, 126.4, 126.1, 125.1, 120.1, 117.2, 113.7, 59.3, 57.4, 53.2, 52.8, 52.7, 38.4; FT-IR (neat) 3026, 2951, 2923, 2852, 1733, 1601, 1496, 1450, 1436, 1351, 1239, 1129, 1100, 1058, 1026, 751, 698  $\text{cm}^{-1}$ ; HRMS (ESI)  $m/z$   $[\text{M}+\text{H}]^+$  calcd for  $\text{C}_{30}\text{H}_{28}\text{NO}_4$ : 466.2013, found: 466.2015.

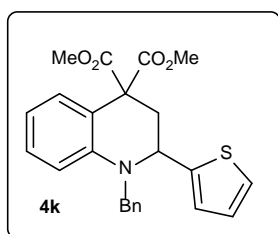

**Dimethyl 1-benzyl-2-(thiophen-2-yl)-2,3-dihydroquinoline-4,4(1H)-**

**dicarboxylate 4k.** Analytical TLC on silica gel, 1:9 ethyl acetate/hexane  $R_f = 0.36$ ; brown sticky liquid; yield 61% (51 mg);  $^1\text{H NMR}$  (400 MHz,  $\text{CDCl}_3$ )  $\delta$  7.20-7.03 (m, 8H), 6.82-6.80 (m, 1H), 6.77-6.76 (m, 1H), 6.70-6.64 (m, 2H), 4.73 (dd,  $J = 8.8, 4.8$  Hz, 1H), 4.60 (d,  $J = 16.4$  Hz, 1H), 4.08 (d,  $J = 16.8$  Hz, 1H), 3.67 (s, 3H), 3.59 (s, 3H), 2.97 (dd,  $J = 13.6, 4.8$  Hz, 1H), 2.69 (dd,  $J = 13.6, 9.2$  Hz, 1H);  $^{13}\text{C NMR}$  (100 MHz,  $\text{CDCl}_3$ )  $\delta$  171.5, 171.4, 146.1, 144.7, 138.2, 129.5, 129.1, 128.6, 127.2, 127.1, 126.5, 126.0, 125.1, 120.3, 117.7, 114.4, 57.3, 55.0, 53.2, 53.0, 52.9, 39.4; FT-IR (neat) 3028, 2952, 2922, 2851, 1733, 1602, 1494, 1435, 1355, 1242, 1199, 1023, 851, 750, 700  $\text{cm}^{-1}$ ; HRMS (ESI)  $m/z$   $[\text{M}+\text{H}]^+$  calcd for  $\text{C}_{24}\text{H}_{24}\text{NO}_4\text{S}$ : 422.1421, found: 422.1423.

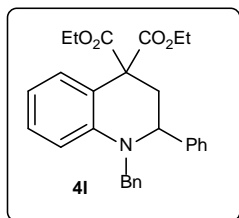

**Diethyl 1-benzyl-2-phenyl-2,3-dihydroquinoline-4,4(1H)-dicarboxylate**

**4l.** Analytical TLC on silica gel, 1:9 ethyl acetate/hexane  $R_f = 0.41$ ; sticky liquid; yield 81% (71 mg);  $^1\text{H}$  NMR (600 MHz,  $\text{CDCl}_3$ )  $\delta$  7.22-7.10 (m, 9H), 7.07-7.04 (m, 1H), 7.02-7.00 (m, 2H), 6.67-6.64 (m, 2H), 4.57 (d,  $J = 16.8$  Hz, 1H), 4.49-4.46 (m, 1H), 4.25-4.20 (m, 1H), 4.13-4.07 (m, 1H), 4.02-3.96 (m, 2H), 3.88-3.82 (m, 1H), 2.87-2.84 (m, 1H), 2.61-2.56 (m, 1H), 1.19-1.17 (m, 3H), 1.12-1.09 (m, 3H);  $^{13}\text{C}$  NMR (150 MHz,  $\text{CDCl}_3$ )  $\delta$  171.1, 171.0, 145.2, 142.2, 138.2, 129.3, 129.2, 128.7, 128.5, 127.7, 127.5, 127.1, 126.9, 119.9, 117.0, 113.5, 62.0, 61.9, 59.4, 57.1, 52.8, 38.3, 14.2, 14.1; FT-IR (neat) 3029, 2981, 1730, 1602, 1495, 1451, 1299, 1237, 1094, 1059, 1029, 862, 747, 701  $\text{cm}^{-1}$ ; HRMS (ESI)  $m/z$   $[\text{M}+\text{H}]^+$  calcd for  $\text{C}_{28}\text{H}_{30}\text{NO}_4$ : 444.2169, found: 444.2177.

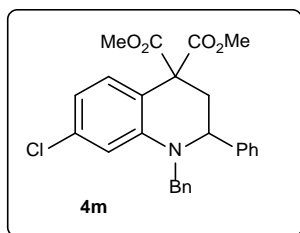

**Dimethyl 1-benzyl-7-chloro-2-phenyl-2,3-dihydroquinoline-4,4(1H)-dicarboxylate. 4m**

**4m** Analytical TLC on silica gel, 1:9 ethyl acetate/hexane  $R_f = 0.47$ ; sticky liquid; yield 64% (57 mg);  $^1\text{H}$  NMR (600 MHz,  $\text{CDCl}_3$ )  $\delta$  7.23-7.13 (m, 6H), 7.07 (d,  $J = 7.8$  Hz, 2H), 7.00-6.95 (m, 3H), 6.65-6.60 (m, 2H), 4.55 (d,  $J = 16.8$  Hz, 1H), 4.48-4.45 (m, 1H), 3.98 (d,  $J = 16.8$  Hz, 1H), 3.67 (s, 3H), 3.40 (s, 3H), 2.88-2.85 (m, 1H), 2.63-2.59 (m, 1H);  $^{13}\text{C}$  NMR (150 MHz,  $\text{CDCl}_3$ )  $\delta$  171.3, 170.9, 146.1, 141.2, 137.2, 135.3, 130.2, 128.8, 128.7, 127.8, 127.38, 127.32, 127.0, 118.0, 116.9, 113.0, 58.9, 56.5, 53.3, 52.9, 52.6, 37.7; FT-IR (neat) 3028, 2951, 1734, 1597, 1562, 1494, 1451, 1432, 1357, 1240, 1105, 1055, 1027, 849, 754, 700  $\text{cm}^{-1}$ ; HRMS (ESI)  $m/z$   $[\text{M}+\text{H}]^+$  calcd for  $\text{C}_{26}\text{H}_{25}\text{ClNO}_4$ : 450.1467, found: 450.1469.

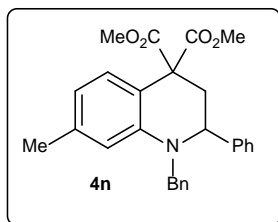

**Dimethyl 1-benzyl-7-methyl-2-phenyl-2,3-dihydroquinoline-4,4(1H)-dicarboxylate 4n.** Analytical TLC on silica gel, 1:9 ethyl acetate/hexane  $R_f = 0.51$ ; sticky liquid; yield 62% (53 mg);  $^1\text{H NMR}$  (400 MHz,  $\text{CDCl}_3$ )  $\delta$  7.22-7.08 (m, 8H), 7.02-6.99 (m, 2H), 6.95 (d,  $J = 8.0$  Hz, 1H), 6.52-6.47 (m, 2H), 4.62 (d,  $J = 16.4$  Hz, 1H), 4.42 (dd,  $J = 8.4, 4.8$  Hz, 1H), 3.97 (d,  $J = 16.8$  Hz, 1H), 3.67 (s, 3H), 3.43 (s, 3H), 2.86 (dd,  $J = 13.6, 5.2$  Hz, 1H), 2.61 (dd,  $J = 13.6, 8.4$  Hz, 1H), 2.16 (s, 3H);  $^{13}\text{C NMR}$  (100 MHz,  $\text{CDCl}_3$ )  $\delta$  171.8, 171.5, 145.1, 142.0, 139.4, 138.3, 129.0, 128.69, 128.60, 127.6, 127.5, 127.2, 127.0, 118.1, 116.9, 114.0, 59.0, 56.9, 53.2, 52.8, 52.7, 38.3, 21.9; FT-IR (neat) 3026, 2949, 2924, 2852, 1734, 1609, 1505, 1449, 1238, 1135, 1026, 940, 754, 700  $\text{cm}^{-1}$ ; HRMS (ESI)  $m/z$   $[\text{M}+\text{H}]^+$  calcd for  $\text{C}_{27}\text{H}_{28}\text{NO}_4$ : 430.2013, found: 430.2014.

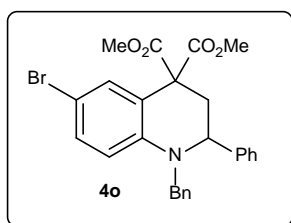

**Dimethyl 1-benzyl-6-bromo-2-phenyl-2,3-dihydroquinoline-4,4(1H)-dicarboxylate 4o.** Analytical TLC on silica gel, 1:9 ethyl acetate/hexane  $R_f = 0.47$ ; semi solid; yield 71% (70 mg);  $^1\text{H NMR}$  (400 MHz,  $\text{CDCl}_3$ )  $\delta$  7.24-7.07 (m, 10H), 7.99-6.97 (m, 2H), 6.53-6.50 (m, 1H), 4.52-4.45 (m, 2H), 3.99 (d,  $J = 16.8$  Hz, 1H), 3.70 (s, 3H), 3.47 (s, 3H), 2.90-2.85 (m, 1H), 2.62-2.56 (m, 1H);  $^{13}\text{C NMR}$  (100 MHz,  $\text{CDCl}_3$ )  $\delta$  171.1, 170.8, 144.1, 141.5, 137.5, 132.2, 131.7, 128.8, 128.7, 127.8, 127.4, 127.2, 127.0, 121.6, 115.1, 108.9, 59.3, 56.9, 53.4, 53.1, 52.8, 38.1; FT-IR (neat) 3029, 2952, 2922, 2852, 1734, 1594, 1493, 1452, 1347, 1239, 1132, 1025, 802, 754, 700  $\text{cm}^{-1}$ ; HRMS (ESI)  $m/z$   $[\text{M}+\text{H}]^+$  calcd for  $\text{C}_{26}\text{H}_{25}\text{BrNO}_4$ : 494.0961, found: 494.0962.

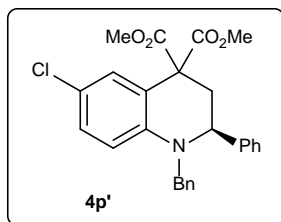

**(S)-Dimethyl 1-benzyl-6-chloro-2-phenyl-2,3-dihydroquinoline-**

**4,4(1H)-dicarboxylate 4p'**. Analytical TLC on silica gel, 1:9 ethyl acetate/hexane  $R_f = 0.44$ ; crystalline solid; mp 165-166 °C; yield 72% (65 mg);  $^1\text{H}$  NMR (400 MHz,  $\text{CDCl}_3$ )  $\delta$  7.23-7.07 (m, 8H), 7.03-6.97 (m, 4H), 6.57 (d,  $J = 8.8$  Hz, 1H), 4.52-4.45 (m, 2H), 3.99 (d,  $J = 16.8$  Hz, 1H), 3.69 (s, 3H), 3.46 (s, 3H), 2.88 (dd,  $J = 13.6, 5.2$  Hz, 1H), 2.60 (dd,  $J = 13.6, 8.8$  Hz, 1H);  $^{13}\text{C}$  NMR (100 MHz,  $\text{CDCl}_3$ )  $\delta$  171.1, 170.8, 143.7, 141.5, 137.6, 129.4, 128.9, 128.8, 128.7, 127.8, 127.4, 127.2, 127.0, 121.8, 121.2, 114.6, 59.2, 56.9, 53.3, 53.0, 52.9, 38.2; FT-IR (KBr) 3028, 2951, 1734, 1599, 1494, 1452, 1346, 1239, 1134, 1061, 1025, 803, 753, 700  $\text{cm}^{-1}$ ; HRMS (ESI)  $m/z$   $[\text{M}+\text{H}]^+$  calcd for  $\text{C}_{26}\text{H}_{25}\text{ClNO}_4$ : 450.1467, found: 450.1465;  $[\alpha]_{\text{D}}^{25} = +32.00$  ( $c = 0.1$ ,  $\text{CHCl}_3$ ); HPLC: >99% *ee* [CHIRALCEL AD-H, hexane/*i*PrOH = 90:10, flow rate: 1 mL /min,  $\lambda = 254$  nm,  $t_{\text{R}} = 16.10$  min (major), 8.68 min (minor)].

BB

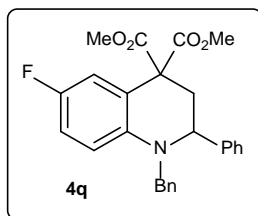

**Dimethyl 1-benzyl-6-fluoro-2-phenyl-2,3-dihydroquinoline-4,4(1H)-**

**dicarboxylate 4q**. Analytical TLC on silica gel, 1:9 ethyl acetate/hexane  $R_f = 0.40$ ; sticky liquid; yield 68% (58 mg);  $^1\text{H}$  NMR (400 MHz,  $\text{CDCl}_3$ )  $\delta$  7.23-7.07 (m, 8H), 7.00-6.98 (m, 2H), 6.84-6.76 (m, 2H), 6.56 (dd,  $J = 9.2, 4.8$  Hz, 1H), 4.49-4.41 (m, 2H), 3.97 (d,  $J = 16.8$  Hz, 1H), 3.69 (s, 3H), 3.49 (s, 3H), 2.89 (dd,  $J = 13.6, 5.2$  Hz, 1H), 2.58 (dd,  $J = 13.6, 9.2$  Hz, 1H);  $^{13}\text{C}$  NMR (150 MHz,  $\text{CDCl}_3$ )  $\delta$  171.1, 170.8, 155.8 ( $J_{\text{C-F}} = 234.3$  Hz), 141.8, 141.6, 137.9, 128.7, 128.6, 127.7, 127.4, 127.1, 121.0 ( $J_{\text{C-F}} = 7.2$  Hz), 116.2, 116.0, 115.8 ( $J_{\text{C-F}} = 23.55$  Hz), 114.4 ( $J_{\text{C-F}} = 7.9$  Hz), 59.3, 57.1, 53.3, 53.2, 53.0, 38.5;  $^{19}\text{F}$  NMR (377 MHz,  $\text{CDCl}_3$ )  $\delta$  -127.87; FT-IR (neat) 3028, 2953, 1733, 1602, 1499, 1453, 1434, 1243, 1166, 1024, 803, 755, 701  $\text{cm}^{-1}$ ; HRMS (ESI)  $m/z$   $[\text{M}+\text{H}]^+$  calcd for  $\text{C}_{26}\text{H}_{25}\text{FNO}_4$ : 434.1762, found: 434.1764.

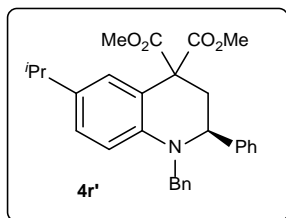

**(S)-Dimethyl 1-benzyl-6-isopropyl-2-phenyl-2,3-dihydroquino-line-**

**4,4(1H)-dicarboxylate 4r'**. Analytical TLC on silica gel, 1:9 ethyl acetate/hexane  $R_f = 0.58$ ; brown oil; yield 66% (60 mg);  $^1\text{H NMR}$  (400 MHz,  $\text{CDCl}_3$ )  $\delta$  7.20-7.09 (m, 8H), 7.02-7.00 (m, 2H), 6.95-6.92 (m, 1H), 6.90-6.89 (m, 1H), 6.60 (d,  $J = 8.4$  Hz, 1H), 4.54 (d,  $J = 16.4$  Hz, 1H), 4.41 (dd,  $J = 9.2, 4.8$  Hz, 1H), 3.96 (d,  $J = 16.4$  Hz, 1H), 3.68 (s, 3H), 3.46 (s, 3H), 2.86 (dd,  $J = 13.6, 5.2$  Hz, 1H), 2.78-2.68 (m, 1H), 2.60 (dd,  $J = 13.6, 8.8$  Hz, 1H), 1.14 (d,  $J = 7.6$  Hz, 6H);  $^{13}\text{C NMR}$  (100 MHz,  $\text{CDCl}_3$ )  $\delta$  171.7, 171.5, 143.3, 142.2, 138.5, 137.2, 128.6, 128.5, 127.6, 127.5, 127.35, 127.30, 127.1, 126.9, 119.4, 113.4, 59.2, 57.3, 53.1, 53.0, 52.7, 38.5, 33.1, 24.2; FT-IR (neat) 3028, 2958, 2871, 1733, 1615, 1505, 1452, 1351, 1239, 1089, 1061, 1026, 949, 814, 752, 700  $\text{cm}^{-1}$ ; HRMS (ESI)  $m/z$   $[\text{M}+\text{H}]^+$  calcd for  $\text{C}_{29}\text{H}_{32}\text{NO}_4$ : 458.2326, found: 458.2331;  $[\alpha]_D^{25} = +32.00$  ( $c = 0.1$ ,  $\text{CHCl}_3$ ); HPLC: >99% *ee* [CHIRALCEL AD-H, hexane/*i*PrOH = 97:03, flow rate: 1 mL/min,  $\lambda = 254$  nm,  $t_R = 11.31$  min (major), 10.03 min (minor)].

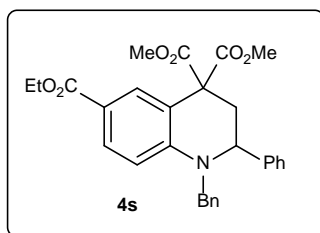

**6-Ethyl 4,4-dimethyl 1-benzyl-2-phenyl-2,3-dihydroquino-line-**

**4,4,6(1H)-tricarboxylate 4s**. Analytical TLC on silica gel, 1:9 ethyl acetate/hexane  $R_f = 0.35$ ; sticky liquid; yield 62% (58 mg);  $^1\text{H NMR}$  (400 MHz,  $\text{CDCl}_3$ )  $\delta$  7.76-7.74 (m, 2H), 7.25-7.14 (m, 6H), 7.10-7.07 (m, 2H), 7.00-6.97 (m, 2H), 6.66 (d,  $J = 8.8$  Hz, 1H), 4.67 (d,  $J = 16.8$  Hz, 1H), 4.56 (dd,  $J = 8.0, 5.2$  Hz, 1H), 4.23 (q,  $J = 7.2$  Hz, 2H), 4.07 (d,  $J = 17.2$  Hz, 1H), 3.70 (s, 3H), 3.43 (s, 3H), 2.92-2.88 (m, 1H), 2.67 (dd,  $J = 13.6, 8.8$  Hz, 1H), 1.26 (t,  $J = 7.2$  Hz, 3H);  $^{13}\text{C NMR}$  (100 MHz,  $\text{CDCl}_3$ )  $\delta$  171.3, 170.8, 166.7, 148.5, 141.0, 137.1, 131.3, 131.2, 128.9, 128.8, 127.9, 127.39, 127.37, 126.9, 118.8, 118.7, 112.4, 60.4, 59.4, 56.7, 53.3, 53.0, 52.6, 37.6, 14.6; FT-IR (neat) 3027, 2981, 2953, 2852, 1734, 1705, 1608, 1512, 1451, 1308, 1241, 1171, 1061, 1026, 929, 756, 700  $\text{cm}^{-1}$ ; HRMS (ESI)  $m/z$   $[\text{M}+\text{H}]^+$  calcd for  $\text{C}_{29}\text{H}_{30}\text{NO}_6$ : 488.2068, found: 488.2069.

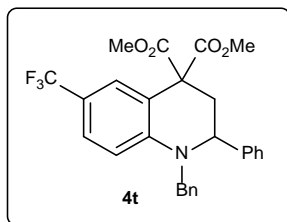

**Dimethyl 1-benzyl-2-phenyl-6-(trifluoromethyl)-2,3-dihydroqui-**

**noline-4,4(*1H*)-dicarboxylate 4t.** Analytical TLC on silica gel, 1:9 ethyl acetate/hexane  $R_f = 0.37$ ; colorless solid; mp 116-117 °C; yield 77% (74 mg);  $^1\text{H}$  NMR (600 MHz,  $\text{CDCl}_3$ )  $\delta$  7.30-7.27 (m, 2H), 7.24-7.14 (m, 6H), 7.08 (d,  $J = 7.2$  Hz, 2H), 7.01 (d,  $J = 7.2$  Hz, 2H), 6.67 (d,  $J = 9.0$  Hz, 1H), 4.62-4.56 (m, 2H), 4.07 (d,  $J = 16.8$  Hz, 1H), 3.70 (s, 3H), 3.40 (s, 3H), 2.92 (dd,  $J = 13.8, 5.4$  Hz, 1H), 2.68 (dd,  $J = 13.8, 9.0$  Hz, 1H);  $^{13}\text{C}$  NMR (150 MHz,  $\text{CDCl}_3$ )  $\delta$  171.0, 170.6, 147.4, 140.9, 137.1, 128.89, 128.87, 128.0, 127.4, 127.3, 126.8, 126.7 (q,  $J = 3.5$  Hz), 126.6 (q,  $J = 3.8$  Hz), 125.8 (q,  $J = 268.9$  Hz), 118.8, 118.6 (q,  $J = 32.2$  Hz), 112.7, 59.3, 56.5, 53.4, 53.0, 52.8, 37.4;  $^{19}\text{F}$  NMR (377 MHz,  $\text{CDCl}_3$ )  $\delta$  -61.02; FT-IR (KBr) 3030, 2953, 1735, 1619, 1519, 1494, 1453, 1435, 1334, 1273, 1156, 1123 1087, 754, 700  $\text{cm}^{-1}$ ; HRMS (ESI)  $m/z$   $[\text{M}+\text{H}]^+$  calcd for  $\text{C}_{27}\text{H}_{25}\text{F}_3\text{NO}_4$ : 484.1730, found: 484.1734.

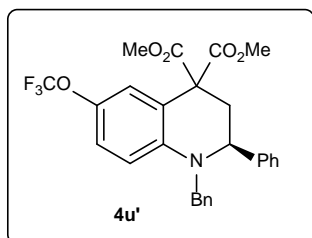

**(*S*)-Dimethyl 1-benzyl-2-phenyl-6-(trifluoromethoxy)-2,3-dihydro-**

**droquinoline-4,4(*1H*)-dicarboxylate 4u'.** Analytical TLC on silica gel, 1:9 ethyl acetate/hexane  $R_f = 0.36$ ; semi solid; yield 69% (68 mg);  $^1\text{H}$  NMR (400 MHz,  $\text{CDCl}_3$ )  $\delta$  7.24-7.08 (m, 8H), 7.02-6.97 (m, 3H), 6.94-6.90 (m, 1H), 6.59 (d,  $J = 9.2$  Hz, 1H), 4.54-4.48 (m, 2H), 4.03 (d,  $J = 16.8$  Hz, 1H), 3.69 (s, 3H), 3.44 (s, 3H), 2.89 (dd,  $J = 13.6, 4.8$  Hz, 1H), 2.63 (dd,  $J = 13.6, 8.4$  Hz, 1H);  $^{13}\text{C}$  NMR (100 MHz,  $\text{CDCl}_3$ )  $\delta$  171.0, 170.7, 144.0, 141.4, 139.9, 137.6, 128.8, 128.7, 127.9, 127.4, 127.2, 126.9, 122.7, 122.4, 122.1 (q,  $J = 254.1$  Hz), 120.1, 113.8, 59.4, 56.9, 53.3, 53.1, 53.0, 37.9;  $^{19}\text{F}$  NMR (377 MHz,  $\text{CDCl}_3$ )  $\delta$  -58.38; FT-IR (neat) 3029, 2956, 2924, 2853, 1737, 1604, 1502, 1454, 1435, 1377, 1261, 1162, 1025, 804, 762, 700  $\text{cm}^{-1}$ ; HRMS (ESI)  $m/z$   $[\text{M}+\text{H}]^+$  calcd for  $\text{C}_{27}\text{H}_{25}\text{F}_3\text{NO}_5$ : 500.1679, found: 500.1680;  $[\alpha]_D^{25} = +46.00$  ( $c = 0.1$ ,  $\text{CHCl}_3$ ); HPLC:

>97% *ee* [CHIRALCEL AD-H, hexane/*i*PrOH = 90:10, flow rate: 1 mL /min,  $\lambda$  = 254 nm,  $t_R$  = 9.51 min (major), 5.92 min (minor)].

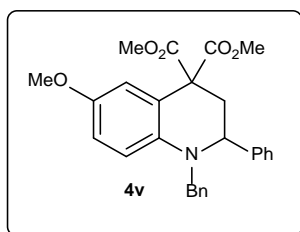

**Dimethyl 1-benzyl-6-methoxy-2-phenyl-2,3-dihydroquinoline-**

**4,4(1H)-dicarboxylate 4v.** Analytical TLC on silica gel, 1:9 ethyl acetate/hexane  $R_f$  = 0.47; sticky liquid; yield 56% (50 mg);  $^1\text{H}$  NMR (600 MHz,  $\text{CDCl}_3$ )  $\delta$  7.22-7.10 (m, 8H), 7.01 (d,  $J$  = 7.2 Hz, 2H), 6.69-6.66 (m, 2H), 6.60 (d,  $J$  = 9.0 Hz, 1H), 4.48 (d,  $J$  = 16.2 Hz, 1H), 4.39-4.37 (m, 1H), 3.92 (d,  $J$  = 16.2 Hz, 1H), 3.68 (s, 3H), 3.67 (s, 3H), 3.52 (s, 3H), 2.89-2.86 (m, 1H), 2.57-2.53 (m, 1H);  $^{13}\text{C}$  NMR (150 MHz,  $\text{CDCl}_3$ )  $\delta$  171.5, 171.3, 151.3, 142.3, 139.5, 138.4, 128.7, 128.5, 127.6, 127.5, 127.2, 126.9, 121.5, 115.0, 114.8, 114.7, 59.2, 57.5, 55.8, 53.26, 53.24, 53.0, 39.0; FT-IR (neat) 2953, 2924, 2852, 1734, 1501, 1453, 1242, 1053, 803, 755, 701  $\text{cm}^{-1}$ ; HRMS (ESI)  $m/z$   $[\text{M}+\text{H}]^+$  calcd for  $\text{C}_{27}\text{H}_{28}\text{NO}_5$ : 446.1962, found: 446.1972.

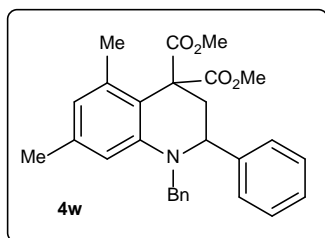

**Dimethyl 1-benzyl-5,7-dimethyl-2-phenyl-2,3-dihydroquinoline-**

**4,4(1H)-dicarboxylate 4w.** Analytical TLC on silica gel, 1:9 ethyl acetate/hexane  $R_f$  = 0.57; sticky liquid; yield 51% (45 mg);  $^1\text{H}$  NMR (400 MHz,  $\text{CDCl}_3$ )  $\delta$  7.23-7.10 (m, 9H), 6.95-6.92 (m, 2H), 6.46 (s, 1H), 6.37 (s, 1H), 4.61 (d,  $J$  = 16.4 Hz, 1H), 4.37 (dd,  $J$  = 9.2, 5.2 Hz, 1H), 3.92 (d,  $J$  = 16.4 Hz, 1H), 3.67 (s, 3H), 3.43 (s, 3H), 2.78 (dd,  $J$  = 13.2, 5.2 Hz, 1H), 2.56 (dd,  $J$  = 13.2, 9.2 Hz, 1H), 2.12 (s, 3H), 2.10 (s, 3H);  $^{13}\text{C}$  NMR (150 MHz,  $\text{CDCl}_3$ )  $\delta$  172.2, 172.0, 145.8, 142.4, 138.5, 138.3, 138.1, 128.7, 128.5, 127.6, 127.4, 127.3, 126.9, 122.1, 117.5, 112.9, 56.4, 53.4, 53.1, 52.8, 40.6, 21.7, 20.8; FT-IR (neat) 3027, 2950, 2924, 2856, 1732, 1605, 1572, 1451, 1343, 1234, 1073, 1028, 823, 751, 700  $\text{cm}^{-1}$ ; HRMS (ESI)  $m/z$   $[\text{M}+\text{H}]^+$  calcd for  $\text{C}_{28}\text{H}_{30}\text{NO}_4$ : 444.2169, found: 444.2179.



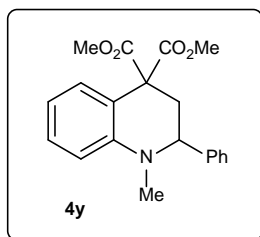

**Dimethyl 1-methyl-2-phenyl-2,3-dihydroquinoline-4,4(1H)-dicar-**

**boxylate 4y.** Analytical TLC on silica gel, 1:9 ethyl acetate/hexane  $R_f = 0.60$ ; sticky liquid; yield 75% (51 mg);  $^1\text{H NMR}$  (400 MHz,  $\text{CDCl}_3$ )  $\delta$  7.27-7.24 (m, 2H), 7.20-7.17 (m, 4H), 7.07-7.05 (m, 1H), 6.70-6.65 (m, 2H), 4.29-4.27 (m, 1H), 3.71 (s, 3H), 3.53 (s, 3H), 2.78 (dd,  $J = 13.8, 4.2$  Hz, 1H), 2.65 (s, 3H), 2.45-2.41(m, 1H);  $^{13}\text{C NMR}$  (100 MHz,  $\text{CDCl}_3$ )  $\delta$  171.74, 171.72, 146.4, 142.6, 129.6, 129.4, 128.8, 127.6, 127.2, 118.9, 116.7, 112.9, 60.8, 57.2, 53.3, 52.9, 38.9, 37.9; FT-IR (neat) 3026, 2953, 2921, 2852, 1735, 1690, 1604, 1495, 1450, 1351, 1239, 1100, 1061, 751, 701  $\text{cm}^{-1}$ ; HRMS (ESI)  $m/z$   $[\text{M}+\text{H}]^+$  calcd for  $\text{C}_{20}\text{H}_{22}\text{NO}_4$ : 340.1543, found: 340.1544.

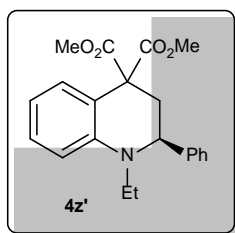

**(S)-Dimethyl 1-ethyl-2-phenyl-2,3-dihydroquinoline-4,4(1H)-dicar-**

**boxylate 4z'.** Analytical TLC on silica gel, 1:9 ethyl acetate/hexane  $R_f = 0.61$ ; semi solid; yield 72% (51 mg);  $^1\text{H NMR}$  (400 MHz,  $\text{CDCl}_3$ )  $\delta$  7.25-7.12 (m, 6H), 7.04-7.02 (m, 1H), 6.76 (d,  $J = 8.8$  Hz, 1H), 6.65-6.61 (m, 1H), 4.35(dd,  $J = 9.6, 4.4$  Hz, 1H), 3.68 (s, 3H), 3.50 (s, 3H), 3.43-3.34 (m, 1H), 2.89-2.80 (m, 1H), 2.76-2.71 (m, 1H), 2.50-2.43 (m, 1H), 0.88 (t,  $J = 7.2$  Hz, 3H);  $^{13}\text{C NMR}$  (100 MHz,  $\text{CDCl}_3$ )  $\delta$  171.8, 171.6, 145.0, 142.8, 129.47, 129.43, 128.7, 127.6, 127.4, 119.8, 116.6, 113.5, 58.3, 57.3, 53.1, 52.8, 43.2, 38.7, 11.2; FT-IR (neat) 3029, 2952, 1733, 1602, 1573, 1495, 1452, 1344, 1255, 1203, 1096, 1058, 1023 749, 703  $\text{cm}^{-1}$ ; HRMS (ESI)  $m/z$   $[\text{M}+\text{H}]^+$  calcd for  $\text{C}_{21}\text{H}_{24}\text{NO}_4$ : 354.1700, found: 354.1706;  $[\alpha]_{\text{D}}^{25} = +12.00$  ( $c = 0.1$ ,  $\text{CHCl}_3$ ); HPLC: >97% *ee* [CHIRALCEL AD-H, hexane/*i*PrOH = 97:03, flow rate: 1 mL /min,  $\lambda = 254$  nm,  $t_R = 10.28$  min (major), 8.65 min (minor)].

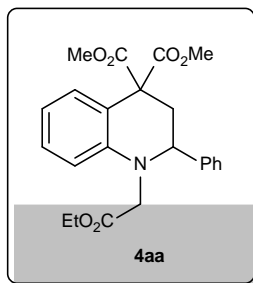

**Dimethyl 1-(2-ethoxy-2-oxoethyl)-2-phenyl-2,3-dihydroquinoline-**

**4,4(1H)-dicarboxylate 4aa.** Analytical TLC on silica gel, 1:9 ethyl acetate/hexane  $R_f = 0.47$ ; sticky liquid; yield 62% (51 mg);  $^1\text{H NMR}$  (400 MHz,  $\text{CDCl}_3$ )  $\delta$  7.34-7.25 (m, 5H), 7.21-7.17 (m, 2H), 6.79-6.75 (m, 1H), 6.68-6.65 (m, 1H), 4.60 (dd,  $J = 10.8, 3.6$  Hz, 1H), 4.09-4.01 (m, 2H), 3.80 (s, 3H), 3.65 (s, 3H), 2.84 (dd,  $J = 13.6, 4.0$  Hz, 1H), 2.55 (dd,  $J = 13.6, 10.8$  Hz, 1H), 1.11 (t,  $J = 7.2$  Hz, 3H);  $^{13}\text{C NMR}$  (100 MHz,  $\text{CDCl}_3$ )  $\delta$  171.9, 171.4, 170.7, 145.3, 142.0, 130.3, 129.5, 129.0, 128.1, 127.6, 119.2, 117.8, 112.9, 60.9, 60.0, 57.4, 53.2, 53.0, 51.0, 38.5, 14.2; FT-IR (neat) 2953, 1733, 1603, 1495, 1454, 1435, 1334, 1236, 1193, 1126, 1093, 1026, 749, 703  $\text{cm}^{-1}$ ; HRMS (ESI)  $m/z$   $[\text{M}+\text{H}]^+$  calcd for  $\text{C}_{23}\text{H}_{26}\text{NO}_6$ : 412.1755, found: 412.1756.

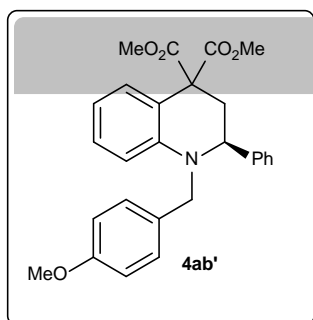

**(S)-Dimethyl 1-(4-methoxybenzyl)-2-phenyl-2,3-dihydroquinoline-**

**4,4(1H)-dicarboxylate 4ab'.** Analytical TLC on silica gel, 1:9 ethyl acetate/hexane  $R_f = 0.63$ ; sticky liquid; yield 71% (63 mg);  $^1\text{H NMR}$  (400 MHz,  $\text{CDCl}_3$ )  $\delta$  7.22-7.01 (m, 7H), 6.91 (d,  $J = 8.8$  Hz, 1H), 6.70-6.62 (m, 4H), 4.53 (d,  $J = 16.4$  Hz, 1H), 4.42-4.39 (m, 1H), 3.89 (d,  $J = 16.4$  Hz, 1H), 3.67 (s, 3H), 3.66 (s, 3H), 3.46 (s, 3H), 2.88-2.83 (m, 1H), 2.60-2.54 (m, 1H);  $^{13}\text{C NMR}$  (100 MHz,  $\text{CDCl}_3$ )  $\delta$  171.7, 171.3, 158.7, 145.2, 142.1, 129.9, 129.5, 128.9, 128.7, 128.4, 127.6, 127.4, 120.1, 117.0, 113.9, 113.6, 58.8, 57.2, 55.4, 53.1, 52.8, 52.0, 38.5; FT-IR (neat) 3028, 2951, 2838, 1733, 1603, 1509, 1453, 1245, 1175, 1102, 1060, 815, 751, 702  $\text{cm}^{-1}$ ; HRMS (ESI)  $m/z$   $[\text{M}+\text{H}]^+$  calcd for  $\text{C}_{27}\text{H}_{28}\text{NO}_5$ : 446.1962 found: 446.1969;  $[\alpha]_{\text{D}}^{25} = -42.00$  ( $c = 0.1$ ,  $\text{CHCl}_3$ ); HPLC: >94% *ee* [CHIRALCEL AD-H, hexane/*i*PrOH = 90:10, flow rate: 1 mL/min,  $\lambda = 254$  nm,  $t_{\text{R}} = 34.75$  min (major), 16.65 min (minor)].

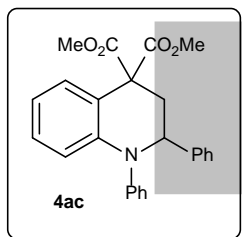

**Dimethyl 1,2-diphenyl-2,3-dihydroquinoline-4,4(1H)-dicarboxylate 4ac.**

Analytical TLC on silica gel, 1:9 ethyl acetate/hexane  $R_f = 0.47$ ; semi solid; yield 68% (54 mg);  $^1\text{H}$  NMR (400 MHz,  $\text{CDCl}_3$ )  $\delta$  7.21-7.05 (m, 9H), 6.90-6.78 (m, 5H), 4.72-4.68 (dd,  $J = 9.2, 6.0$  Hz, 1H), 3.62 (s, 3H), 3.58 (s, 3H), 3.09 (dd,  $J = 13.6, 5.6$  Hz, 1H), 2.61 (dd,  $J = 13.6, 9.2$  Hz, 1H);  $^{13}\text{C}$  NMR (100 MHz,  $\text{CDCl}_3$ )  $\delta$  171.5, 171.0, 147.6, 144.2, 143.1, 129.2, 129.0, 128.7, 128.4, 127.3, 127.0, 124.5, 123.6, 123.5, 120.13, 120.11, 60.5, 57.4, 53.3, 53.0, 40.6; FT-IR (neat) 3029, 2952, 1733, 1594, 1492, 1449, 1383, 1314, 1249, 1129, 1095, 1056, 1026, 751, 699  $\text{cm}^{-1}$ ; HRMS (ESI)  $m/z$   $[\text{M}+\text{H}]^+$  calcd for  $\text{C}_{25}\text{H}_{24}\text{NO}_4$ : 402.1700, found: 402.1703.

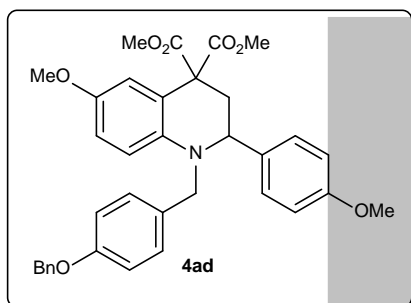

**Dimethyl 1-(4-(benzyloxy)benzyl)-6-methoxy-2-(4-**

**methoxyphenyl)-2,3-dihydroquinoline-4,4(1H)-dicarboxylate 4ad.** Analytical TLC on silica gel, 1:9 ethyl acetate/hexane  $R_f = 0.47$ ; thick liquid; yield 75% (87 mg);  $^1\text{H}$  NMR (400 MHz,  $\text{CDCl}_3$ )  $\delta$  7.43-7.30 (m, 5H), 7.10 (d,  $J = 8.8$  Hz, 2H), 6.99 (d,  $J = 8.8$  Hz, 2H), 6.86-6.68 (m, 7H), 5.02 (s, 2H), 4.49 (d,  $J = 16.0$  Hz, 1H), 4.36-4.33 (m, 1H), 3.90 (d,  $J = 16.0$  Hz, 1H), 3.78 (s, 3H), 3.74 (s, 3H), 3.72 (s, 3H), 3.64 (s, 3H), 2.90 (dd,  $J = 13.6, 5.2$  Hz, 1H), 2.57 (dd,  $J = 13.6, 9.6$  Hz, 1H);  $^{13}\text{C}$  NMR (100 MHz,  $\text{CDCl}_3$ )  $\delta$  171.5, 171.4, 159.0, 157.8, 151.3, 139.8, 137.2, 134.4, 130.7, 128.7, 128.6, 128.5, 128.1, 127.6, 121.8, 115.0, 114.9, 114.84, 114.80, 114.0, 70.1, 58.3, 57.7, 55.8, 55.4, 53.1, 53.0, 52.3, 39.3; FT-IR (neat) 2951, 2836, 1733, 1610, 1584, 1509, 1454, 1245, 1172, 1032, 832, 744, 698  $\text{cm}^{-1}$ ; HRMS (ESI)  $m/z$   $[\text{M}+\text{H}]^+$  calcd for  $\text{C}_{35}\text{H}_{36}\text{NO}_7$ : 582.2486, found: 582.2485.

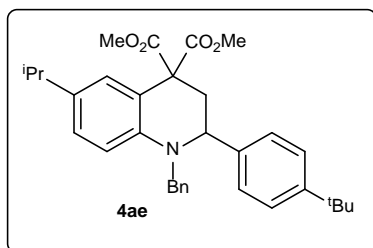

**Dimethyl 1-benzyl-2-(4-(tert-butyl)phenyl)-6-isopropyl-2,3-dihydroquinoline-4,4(1H)-dicarboxylate 4ae.** Analytical TLC on silica gel, 1:9 ethyl acetate/hexane  $R_f = 0.68$ ; sticky liquid; yield 78% (80 mg);  $^1\text{H}$  NMR (400 MHz,  $\text{CDCl}_3$ )  $\delta$  7.21-7.08 (m, 5H), 7.05-7.01 (m, 4H), 6.94-6.88 (m, 2H), 6.59 (d,  $J = 8.4$  Hz, 1H), 4.54 (d,  $J = 16.8$  Hz, 1H), 4.43-4.40 (m, 1H), 4.01 (d,  $J = 16.8$  Hz, 1H), 3.68 (s, 3H), 3.42 (s, 3H), 2.86 (dd,  $J = 13.6, 4.8$  Hz, 1H), 2.76-2.69 (m, 1H), 2.62 (dd,  $J = 13.6, 8.8$  Hz, 1H), 1.21 (s, 9H), 1.14 (d,  $J = 6.8$ , 6H);  $^{13}\text{C}$  NMR (100 MHz,  $\text{CDCl}_3$ )  $\delta$  171.9, 171.6, 150.4, 143.3, 138.9, 138.7, 137.0, 128.5, 127.4, 127.28, 127.23, 127.1, 126.8, 125.5, 119.1, 113.3, 59.0, 57.3, 53.1, 53.0, 52.7, 38.3, 34.6, 33.1, 31.5, 24.3, 24.2; FT-IR (neat) 3026, 2958, 2869, 1735, 1615, 1508, 1453, 1434, 1360, 1239, 1142, 1081, 1025, 810, 756, 699  $\text{cm}^{-1}$ ; HRMS (ESI)  $m/z$   $[\text{M}+\text{H}]^+$  calcd for  $\text{C}_{33}\text{H}_{40}\text{NO}_4$ : 514.2952, found: 514.2961.

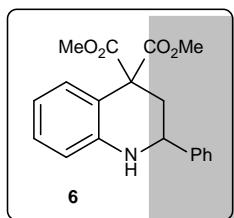

**Dimethyl 2-phenyl-2,3-dihydroquinoline-4,4(1H)-dicarboxylate 6.**<sup>4</sup> Anisole (2 mL) was added to a stirring solution of **4ab** (0.1 mmol, 50 mg) in TFA (1.5 mL, 1 mmol) and the resultant mixture was heated to reflux for 4 h. The reaction was quenched by addition of sat. aq.  $\text{NaHCO}_3$  (5 mL) and extracted with  $\text{CH}_2\text{Cl}_2$  (10 mL). Drying ( $\text{Na}_2\text{SO}_4$ ) and evaporation of the solvent gave a residue that was purified on silica gel column chromatography to give **6**. Analytical TLC on silica gel, 1:9 ethyl acetate/hexane  $R_f = 0.37$ ; yellow solid; mp 124-125  $^\circ\text{C}$ ; yield 89% (29 mg);  $^1\text{H}$  NMR (400 MHz,  $\text{CDCl}_3$ )  $\delta$  7.47-7.44 (m, 2H), 7.40-7.29 (m, 4H), 7.15-7.10 (m, 1H), 6.76-6.72 (m, 1H), 6.60-6.58 (m, 1H), 4.47-4.43 (m, 1H), 4.17 (brs, 1H), 3.80 (s, 3H), 3.74 (s, 3H), 2.81 (dd,  $J = 13.2, 2.8$  Hz, 1H), 2.32 (dd,  $J = 13.2, 11.6$  Hz, 1H);  $^{13}\text{C}$  NMR (100

MHz, CDCl<sub>3</sub>)  $\delta$  172.2, 171.7, 144.8, 142.9, 131.1, 129.3, 128.9, 128.2, 126.9, 117.7, 115.7, 115.3, 57.5, 53.7, 53.3, 53.1, 38.6; FT-IR (neat) 3028, 2952, 2848, 1731, 1607, 1490, 1434, 1321, 1253, 1126, 1059, 751, 701 cm<sup>-1</sup>; HRMS (ESI)  $m/z$  [M+H]<sup>+</sup> calcd for C<sub>19</sub>H<sub>20</sub>NO<sub>4</sub>: 326.1387, found: 326.1397.

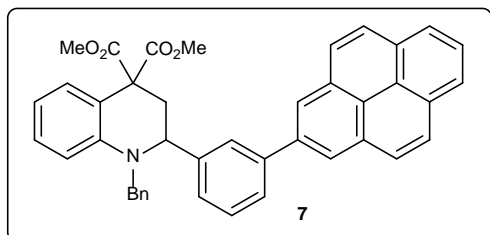

**Dimethyl 1-benzyl-2-(3-(pyren-2-yl)phenyl)-2,3-dihydroquinoline-4,4(1H)-dicarboxylate 7.** Tetrahydroquinoline **4c** (0.1 mmol, 50 mg), Pd(PPh<sub>3</sub>)<sub>4</sub> (2 mol %, 2.3 mg), pyrene-1-boronic acid (0.2 mmol, 50 mg), Na<sub>2</sub>CO<sub>3</sub> (0.2 mmol, 22 mg) and H<sub>2</sub>O (50  $\mu$ L) were refluxed in toluene:EtOH (1:1, 2 mL) for 4 h under N<sub>2</sub> atmosphere. After completion, the reaction mixture was cooled to room temperature and passed through a short pad of celite using CH<sub>2</sub>Cl<sub>2</sub> (10 mL). Evaporation of the solvent gave a residue that was purified on silica gel column chromatography using hexane and ethyl acetate as an eluent to give **7**. Analytical TLC on silica gel, 1:9 ethyl acetate/hexane R<sub>f</sub> = 0.32; semi solid; yield 91% (56 mg); <sup>1</sup>H NMR (600 MHz, CDCl<sub>3</sub>)  $\delta$  8.13-8.09 (m, 3H), 8.07 (d,  $J$  = 9.0 Hz, 1H), 8.02 (s, 2H), 7.96-7.93 (m, 2H), 7.76 (s, 1H), 7.45-7.39 (m, 3H), 7.25-7.23 (m, 1H), 7.21-7.18 (m, 2H), 7.16-7.13 (m, 1H), 7.11-7.05 (m, 4H), 6.69-6.65 (m, 2H), 4.70 (d,  $J$  = 16.8 Hz, 1H), 4.61-4.58 (m, 1H), 4.18 (d,  $J$  = 16.8 Hz, 1H), 3.70 (s, 3H), 3.52 (s, 3H), 3.01 (dd,  $J$  = 13.8, 4.8 Hz, 1H), 2.76 (dd,  $J$  = 13.2, 8.4 Hz, 1H); <sup>13</sup>C NMR (150 MHz, CDCl<sub>3</sub>)  $\delta$  171.7, 171.5, 145.2, 142.2, 141.6, 138.2, 137.4, 131.6, 131.1, 130.8, 130.0, 129.7, 129.6, 129.2, 128.7, 128.5, 127.8, 127.7, 127.66, 127.61, 127.19, 127.11, 126.4, 126.2, 125.3, 125.2, 125.1, 125.07, 125.04, 124.8, 119.6, 117.2, 113.6, 59.4, 57.2, 53.3, 53.2, 53.0, 38.4; FT-IR (neat) 2924, 2853, 1732, 1602, 1456, 1451, 1239, 1083, 1029, 848, 750 cm<sup>-1</sup>; HRMS (ESI)  $m/z$  [M+H]<sup>+</sup> calcd for C<sub>42</sub>H<sub>34</sub>NO<sub>4</sub>: 616.2482, found: 616.2489.

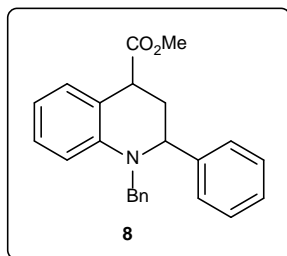

**Methyl 1-benzyl-2-phenyl-1,2,3,4-tetrahydroquinoline-4-carboxylate**

**8.**<sup>5</sup> Tetrahydroquinoline **4a** (41.6 mg, 0.1 mmol), LiCl (12.7 mg, 0.3 mmol) and H<sub>2</sub>O (1 drop) were stirred in DMSO (2 mL) at 130 °C for 12 h. The mixture was cooled to room temperature, washed with brine (5 mL) and extracted with ethyl acetate (10 mL). Evaporation of the solvent gave a residue that was purified by silica gel column chromatography using hexane and ethyl acetate as an eluent to furnish **8** in 77% yield as a 6:5 mixture of diastereomers.

Data for major diastereomer. Analytical TLC on silica gel, 1:9 ethyl acetate/hexane  $R_f = 0.60$ ; liquid; yield 42% (15 mg); <sup>1</sup>H NMR (400 MHz, CDCl<sub>3</sub>) δ 7.23-7.09 (m, 10H), 7.06-7.01 (m, 1H), 6.96-6.94 (m, 1H), 6.64-6.59 (m, 2H), 4.69 (d,  $J = 17.2$  Hz, 1H), 4.58 (t,  $J = 5.2$  Hz, 1H), 4.093 (d,  $J = 17.6$  Hz, 1H), 3.75 (t,  $J = 5.6$  Hz, 1H), 3.20 (s, 3H), 2.73-2.68 (m, 1H), 2.47-2.41 (m, 1H); <sup>13</sup>C NMR (100 MHz, CDCl<sub>3</sub>) δ 173.7, 145.1, 141.8, 138.5, 130.4, 128.7, 128.5, 127.4, 127.0, 126.6, 118.9, 116.4, 112.0, 60.6, 53.0, 51.9, 42.0 32.9; FT-IR (neat) 3028, 2952, 1734, 1602, 1494, 1400, 1451, 1196, 1162, 1124, 1014 cm<sup>-1</sup>; HRMS (ESI)  $m/z$  [M+H]<sup>+</sup> calcd for C<sub>24</sub>H<sub>24</sub>NO<sub>2</sub>: 358.1802, found: 358.1803.

Data for minor diastereomer. Analytical TLC on silica gel, 1:9 ethyl acetate/hexane  $R_f = 0.63$ ; sticky liquid; yield 35% (12 mg); <sup>1</sup>H NMR (600 MHz, CDCl<sub>3</sub>) δ 7.25-7.10 (m, 10H), 7.03-7.00 (m, 1H), 6.95 (d,  $J = 7.8$  Hz, 1H), 6.60-6.54 (m, 2H), 4.66 (t,  $J = 5.4$  Hz, 1H), 4.63 (d,  $J = 17.4$  Hz, 1H), 4.14 (d,  $J = 17.4$  Hz, 1H), 3.67 (s, 3H), 3.62-3.59 (m, 1H), 2.57-2.52 (m, 1H), 2.19-2.16 (m, 1H); <sup>13</sup>C NMR (150 MHz, CDCl<sub>3</sub>) δ 174.7, 144.9, 143.2, 138.3, 128.9, 128.8, 128.7, 128.1, 127.6, 127.0, 126.9, 126.6, 119.2, 116.4, 111.7, 59.8, 52.9, 52.2, 40.6, 33.4; FT-IR (neat) 3018, 2952, 1733, 1601, 1400, 1451, 1250, 1162, 1123, 1013 cm<sup>-1</sup>; HRMS (ESI)  $m/z$  [M+H]<sup>+</sup> calcd for C<sub>24</sub>H<sub>24</sub>NO<sub>2</sub>: 358.1802, found: 358.1804.

## References

1. Preparation of DA cyclopropane, see: A. F. G. Goldberg, N. R. O'Connor, R. A. Craig and B. M. Stolz, *Org. Lett.* 2012, **14**, 5314.
2. For preparation of chiral cyclopropane, see: K. Sapeta and M. A. Kerr, *J. Org. Chem.*, 2007, **72**, 8597.
3. Preparation of *N*-alkylanilines, see: X. Ling, Y. Xiong, R. Huang, X. Zhang, S. Zhang and C. Chen, *J. Org. Chem.* 2013, **78**, 5218.
4. F. Burg, M. Gicquel, S. Breitenlechner, A. Pothig and T. Bach, *Angew. Chem., Int. Ed.*, 2018, **57**, 2953.
5. S. Das, S. Chakrabarty, C. G. Daniliuc and A. Studer, *Org. Lett.* 2016, **18**, 2784.

# NMR spectra

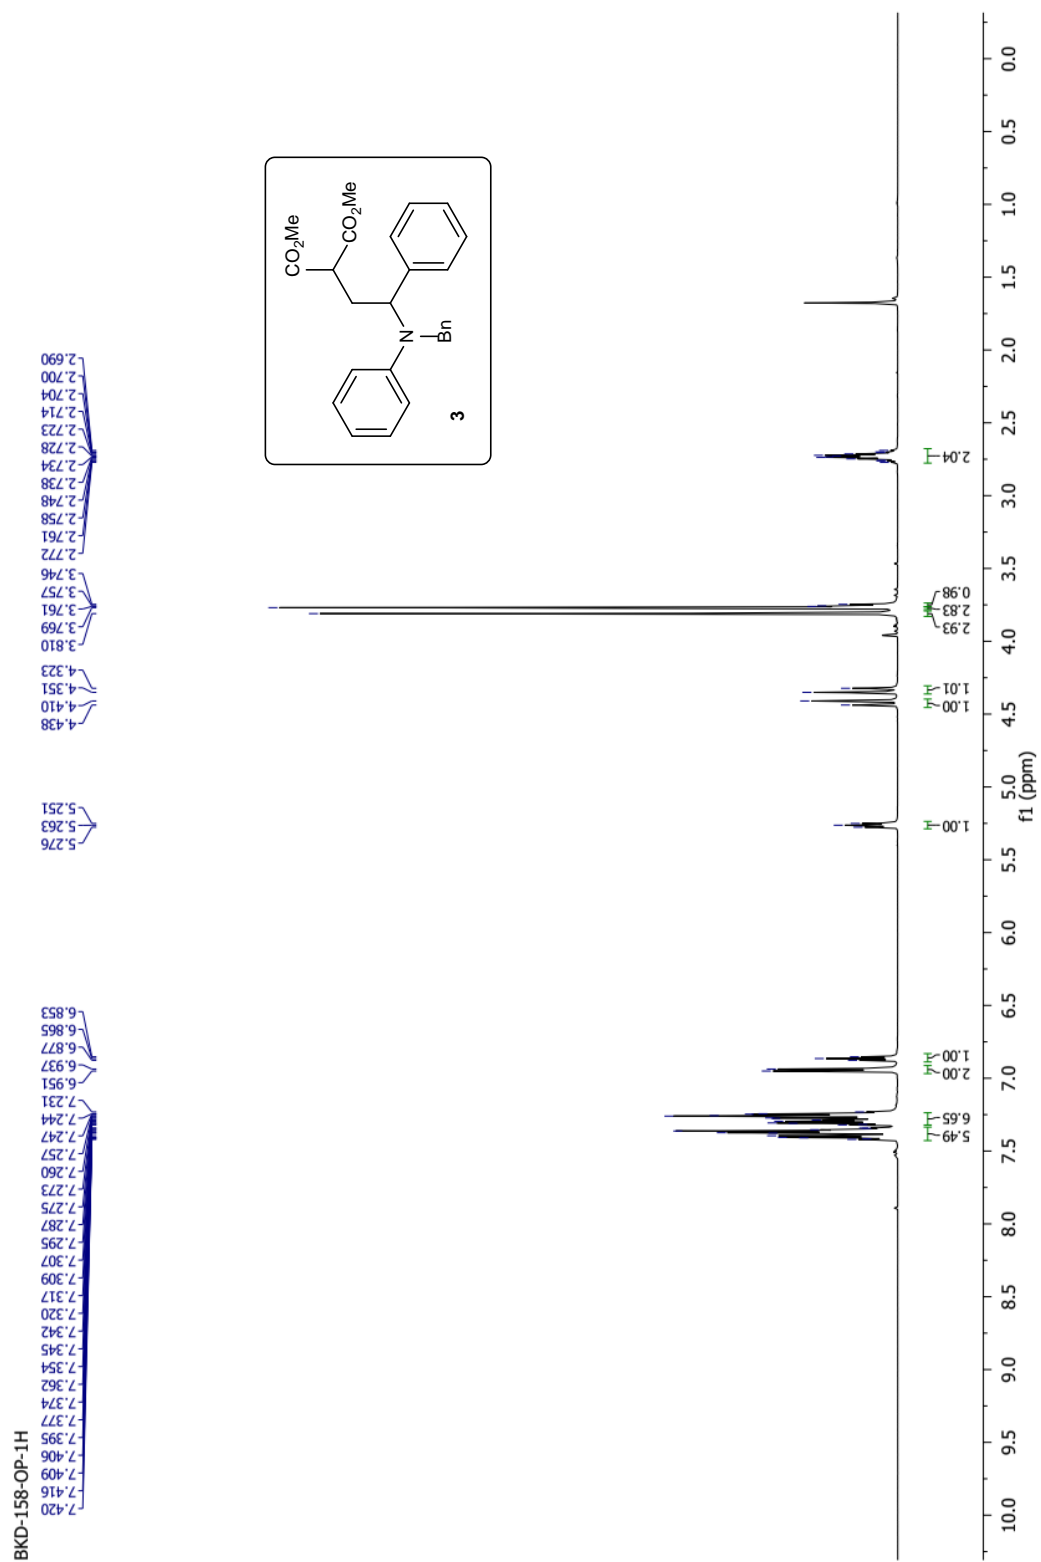



BKD-158-OP-13C

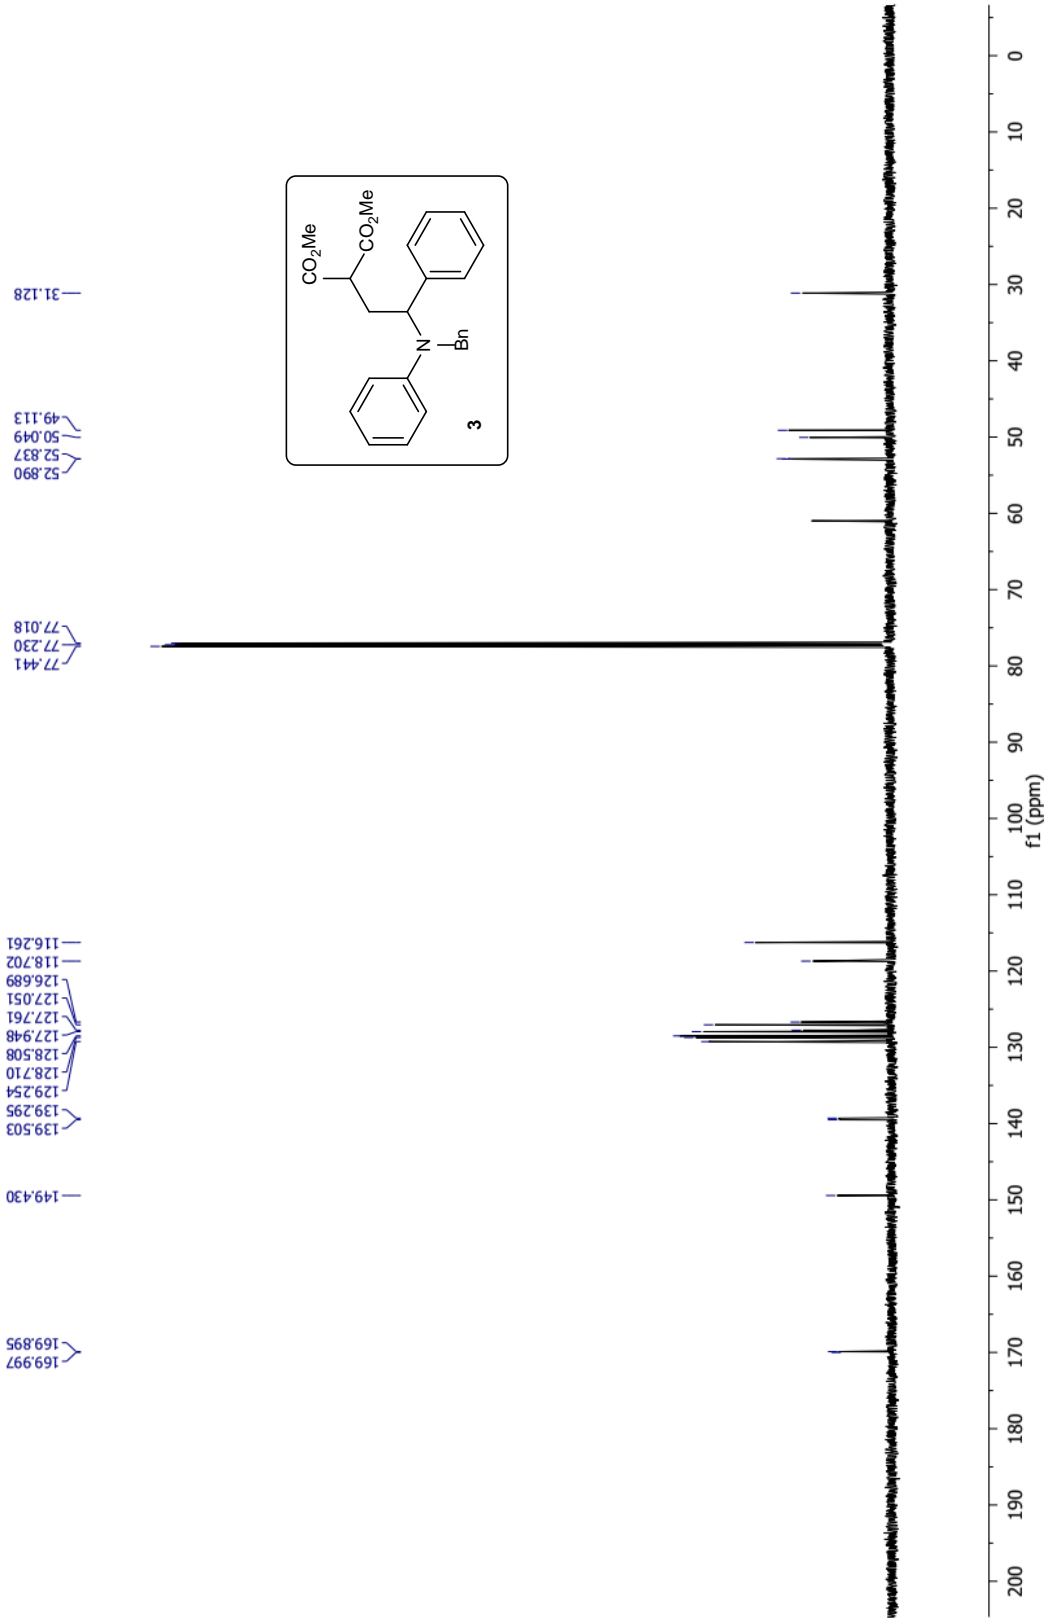



BKD-158-BN-13C

59.188  
57.151  
53.217  
52.875  
52.755  
38.321

77.441  
77.230  
77.018

145.064  
141.973  
138.109  
129.064  
129.529  
129.041  
128.711  
128.590  
127.679  
127.454  
127.092  
127.010  
119.803  
117.069  
113.505

171.706  
171.365

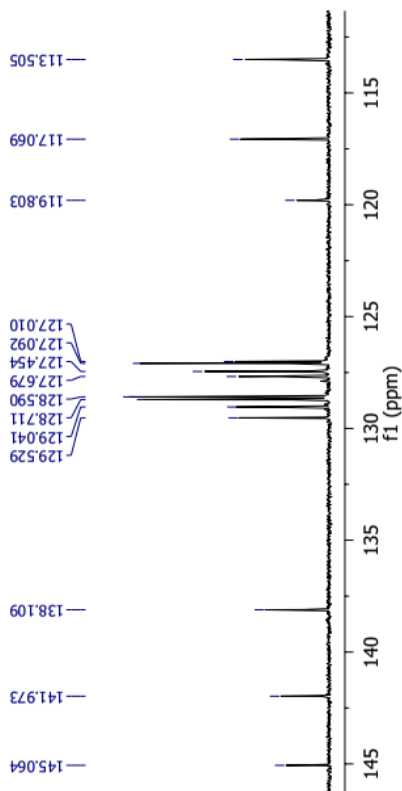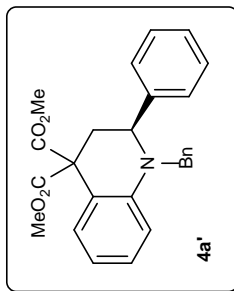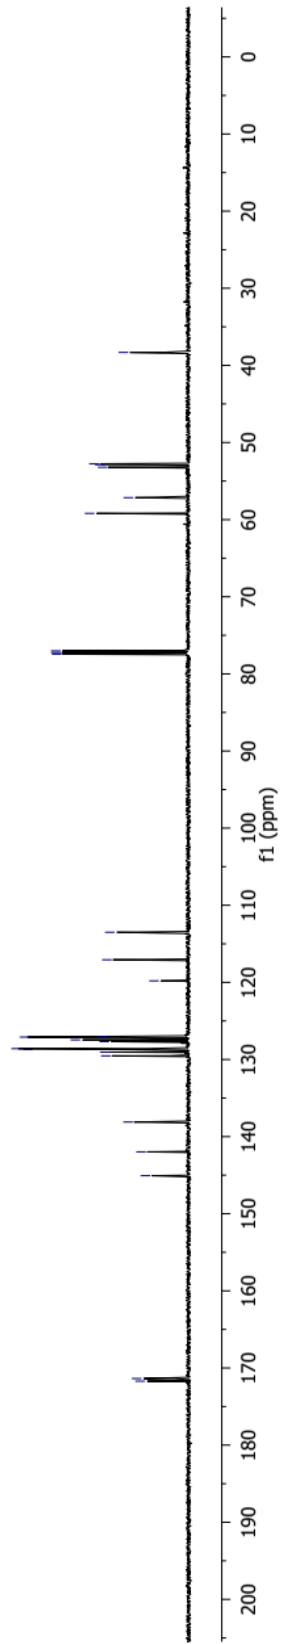

BKD-166-2-ME-1H

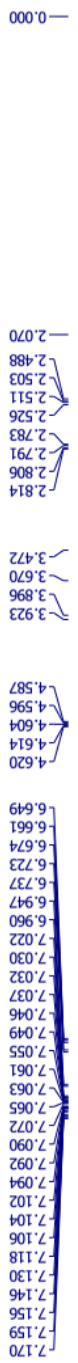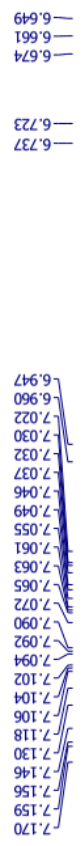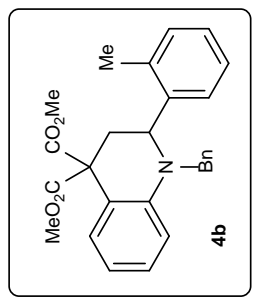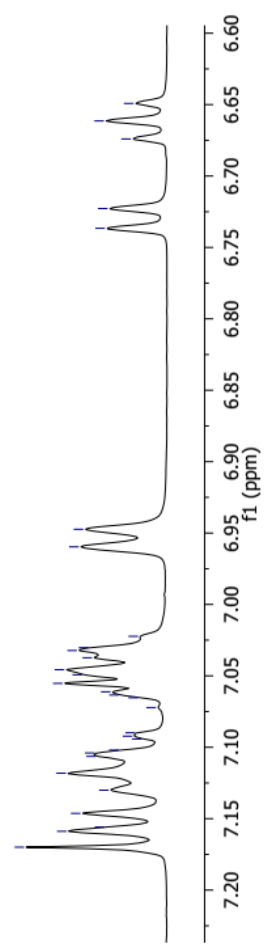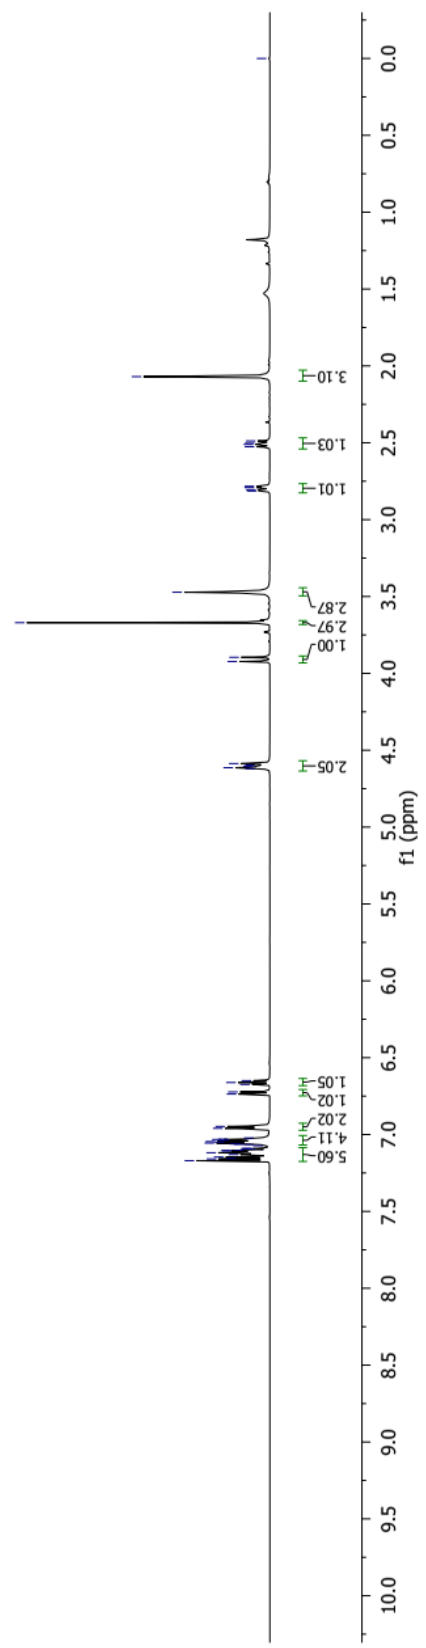

BKD-166-2ME-13C

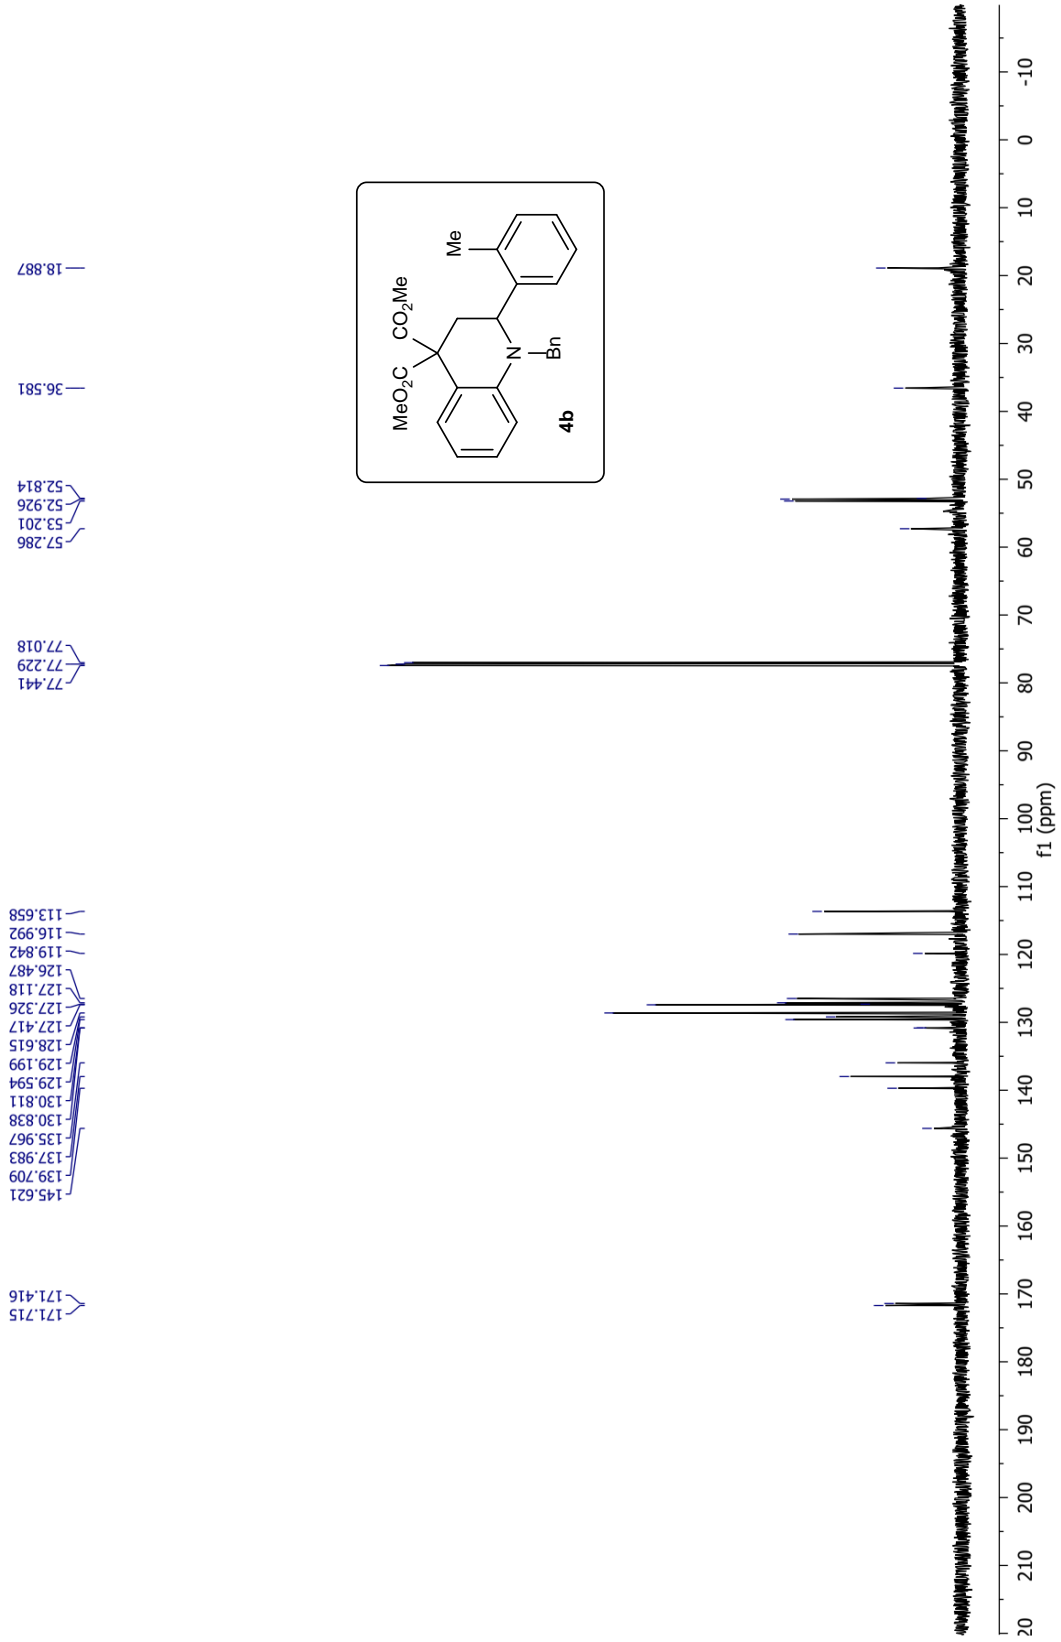





BKD-162-4-Cl-1H

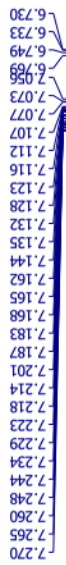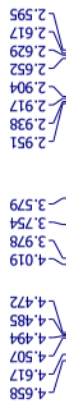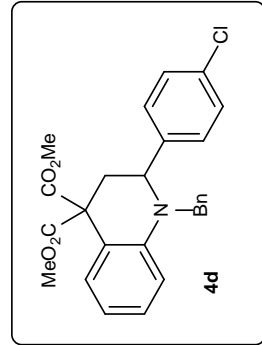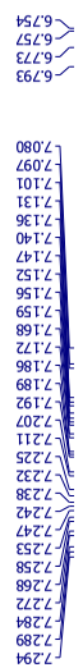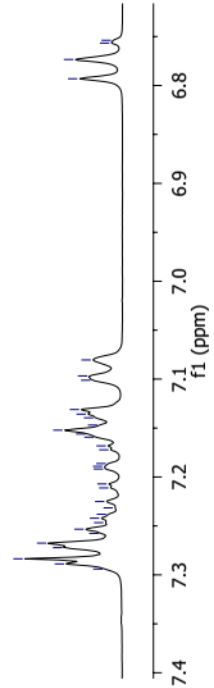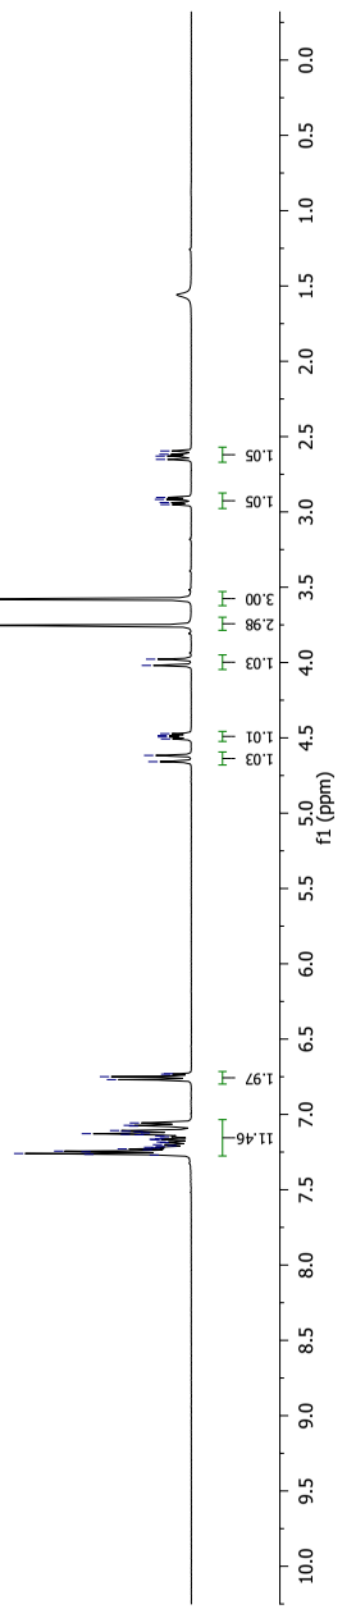



BKD-162-4-CL-13C

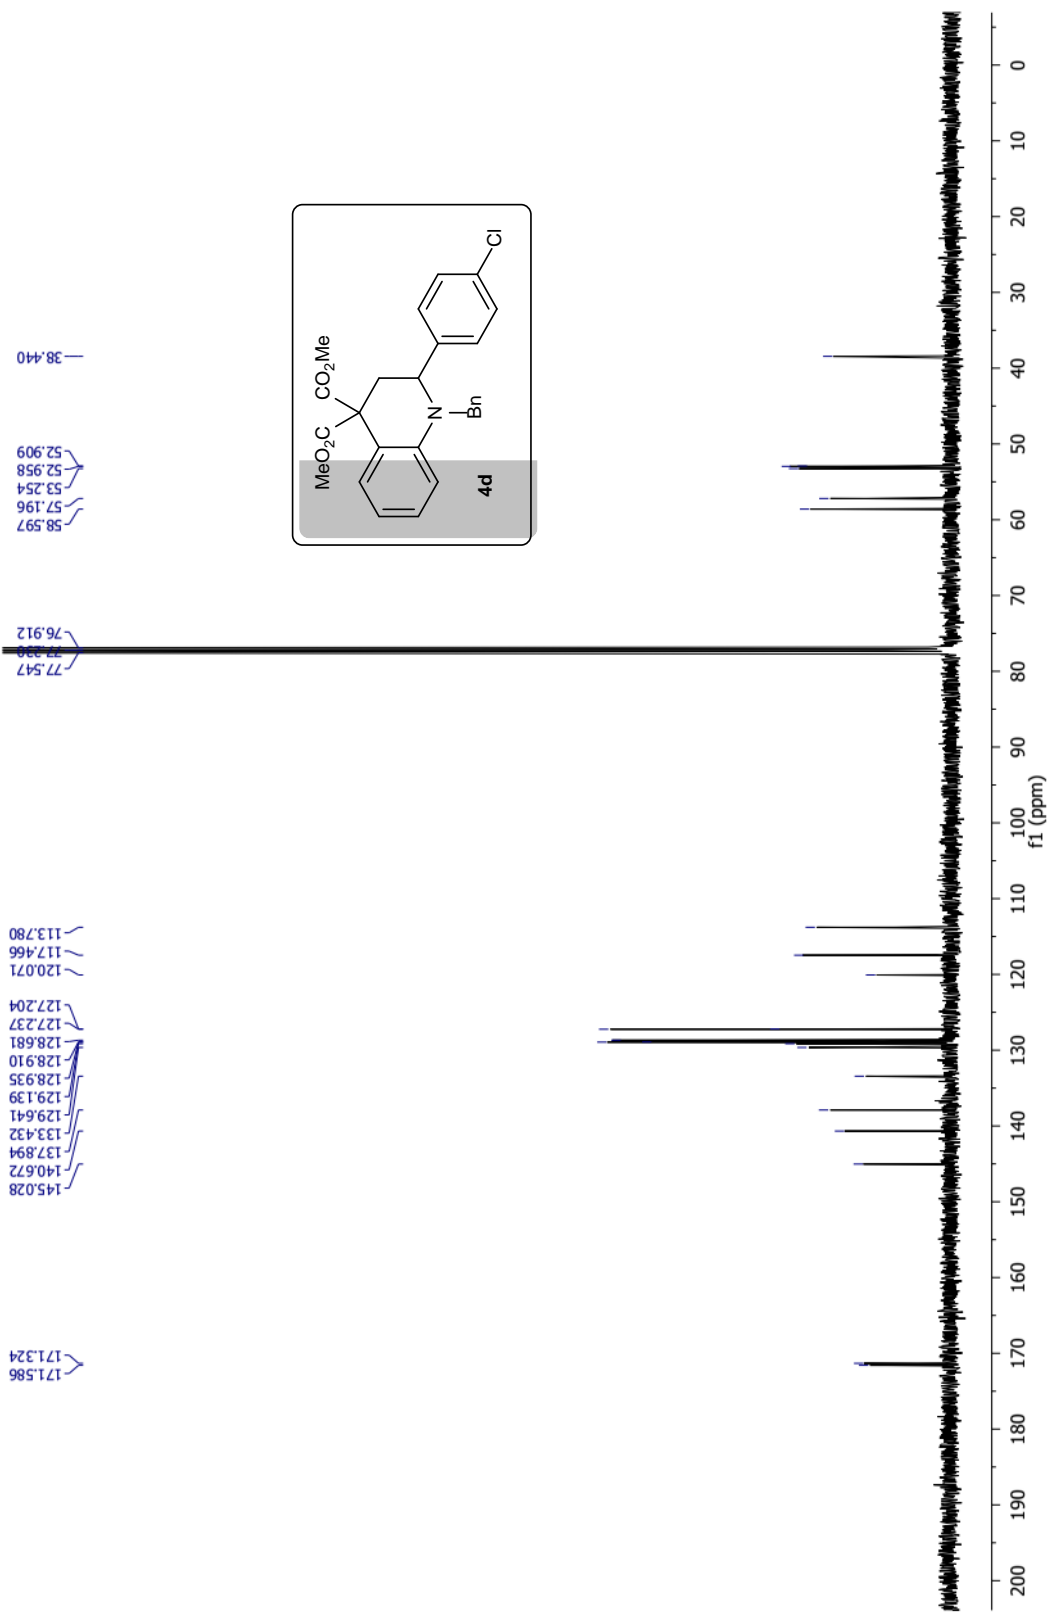

BKD-168-4-F-1H

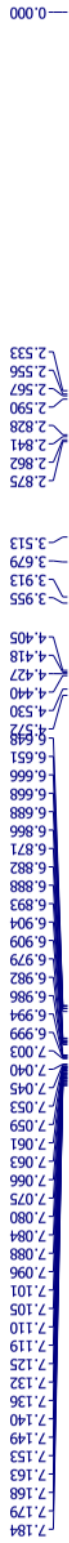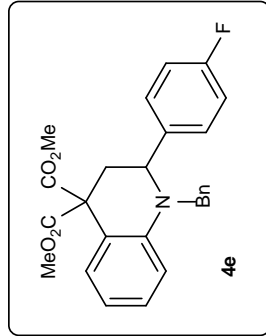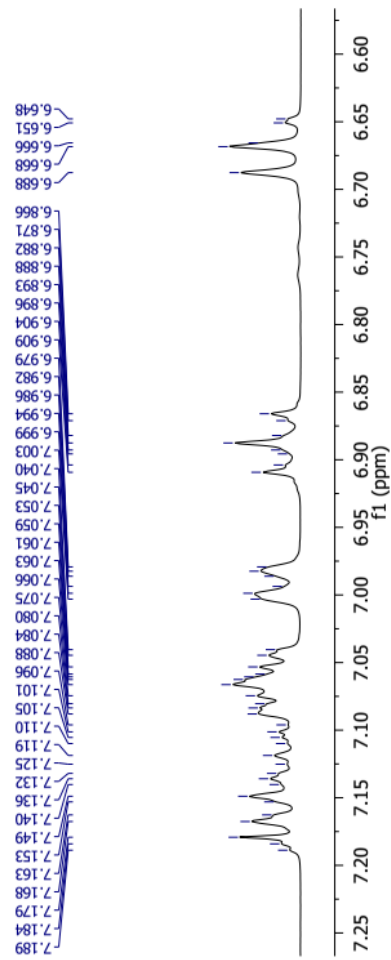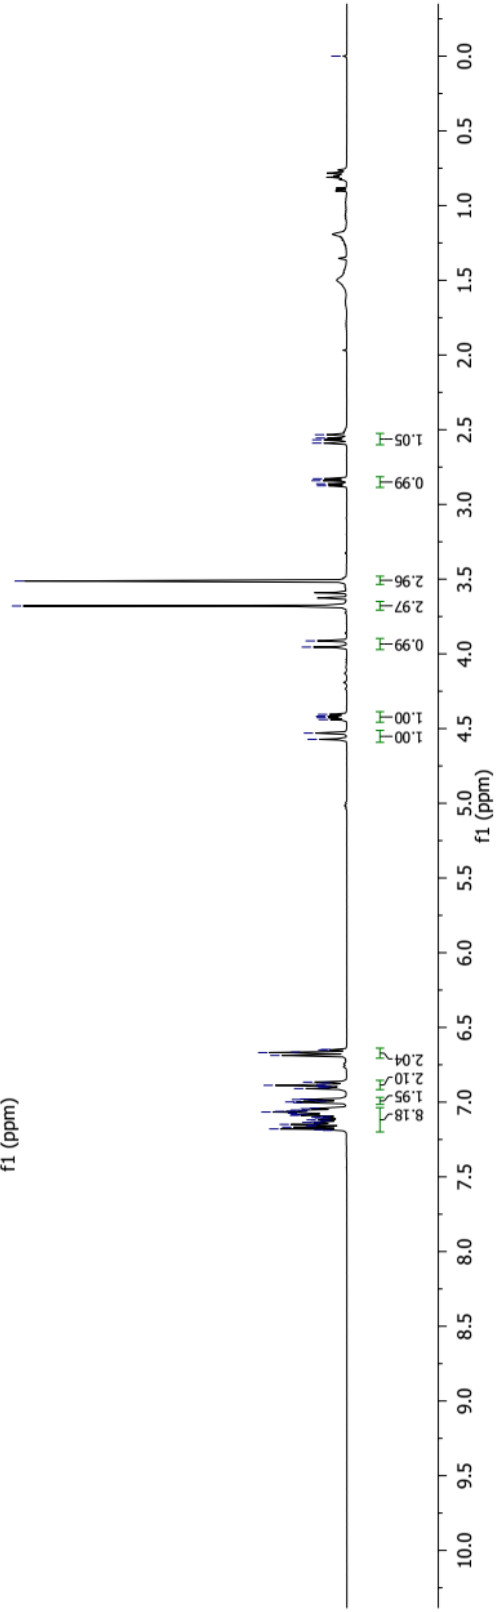

BKD-168-4F-13C

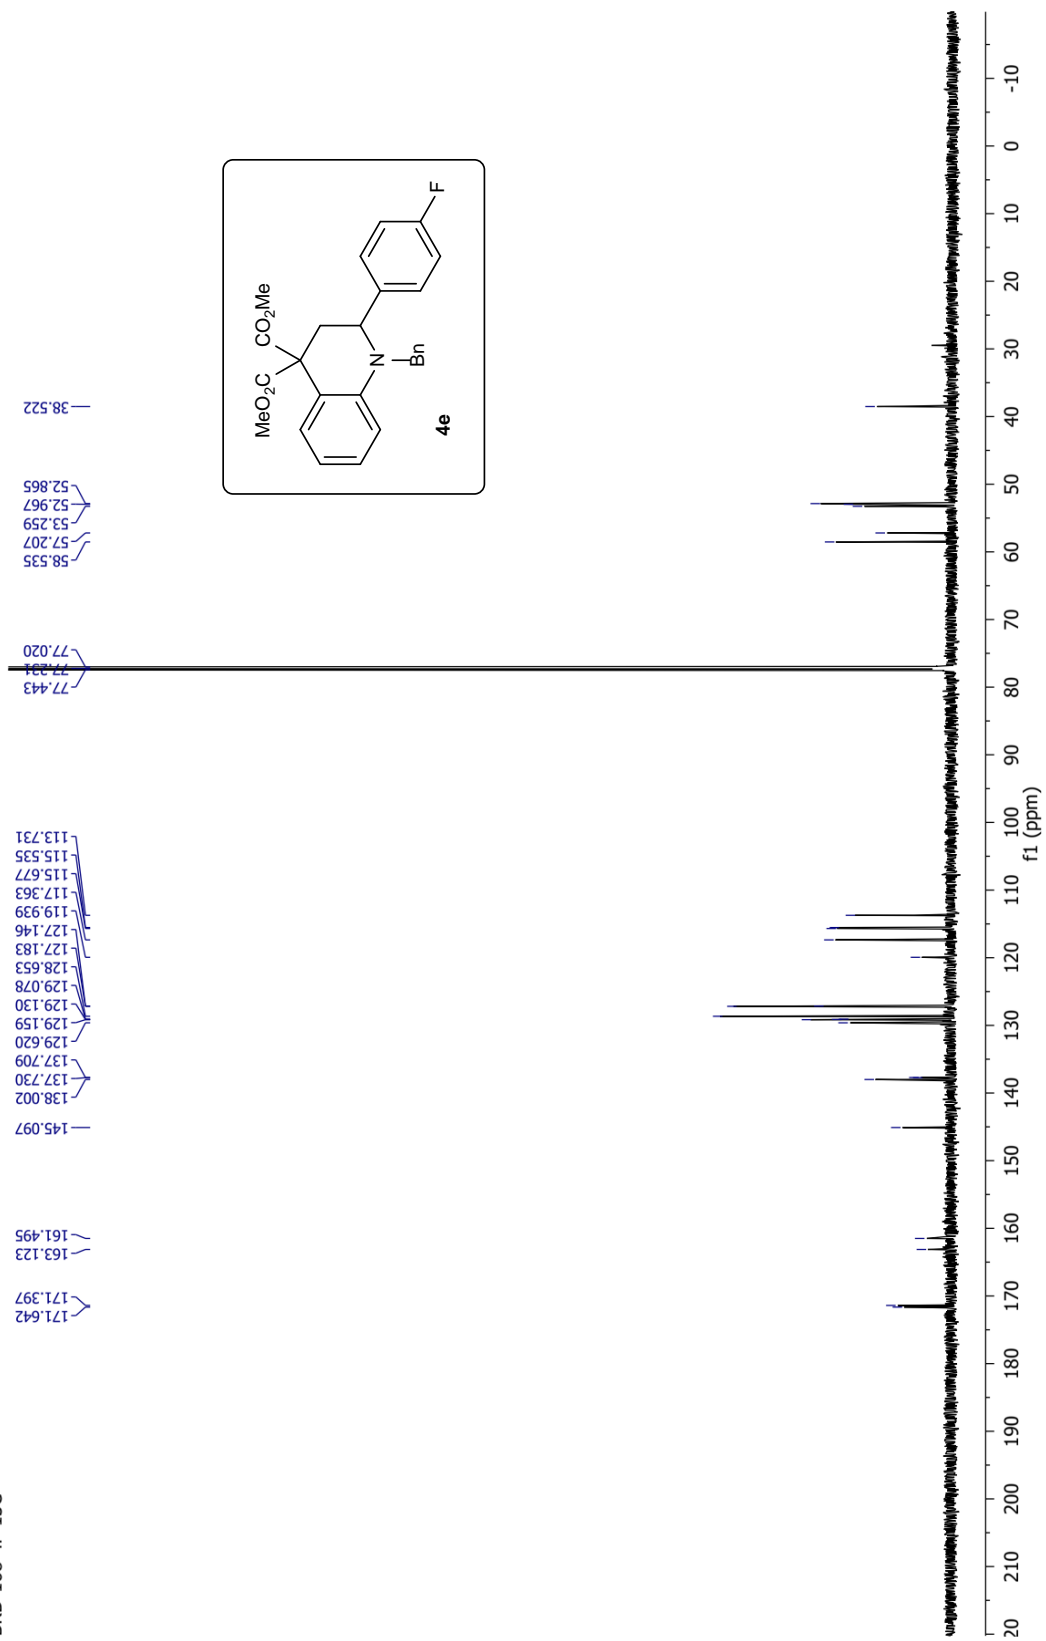

BKD-168-4F-19F

— -114.910

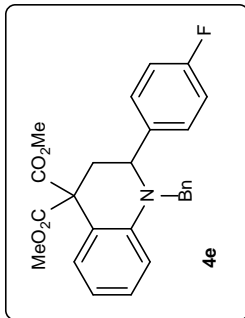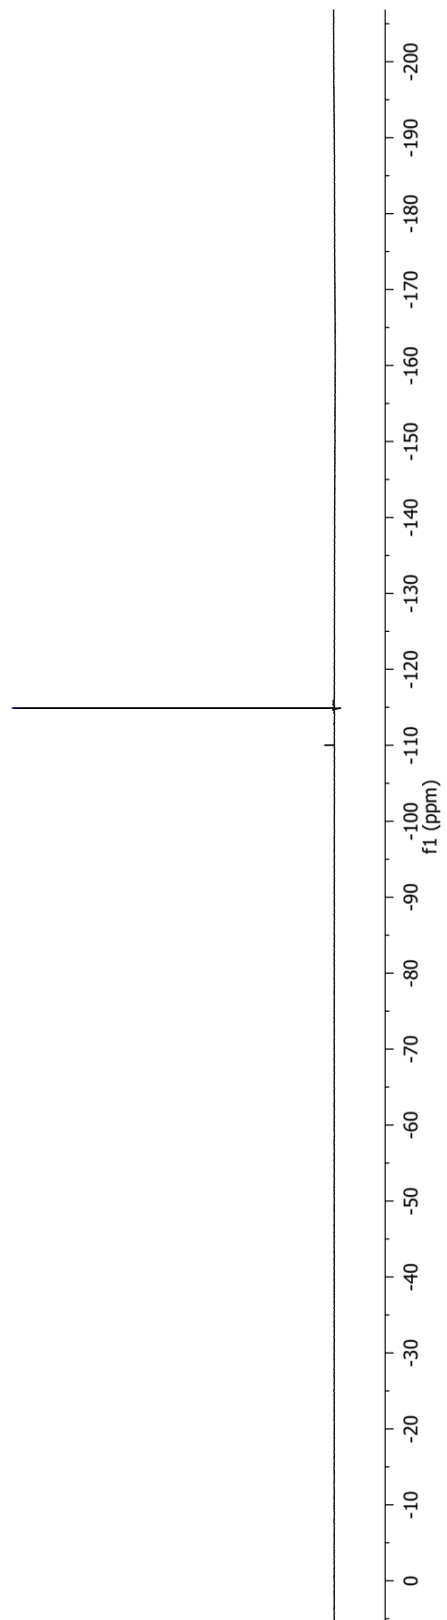

BKD-175-4-ME-1H

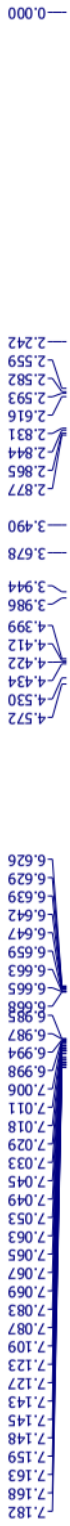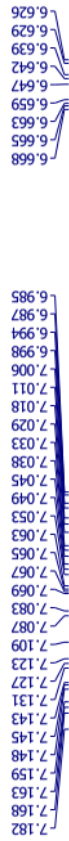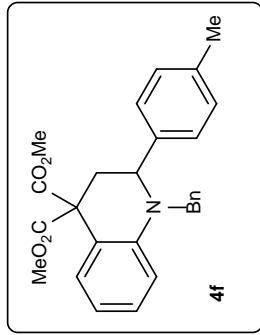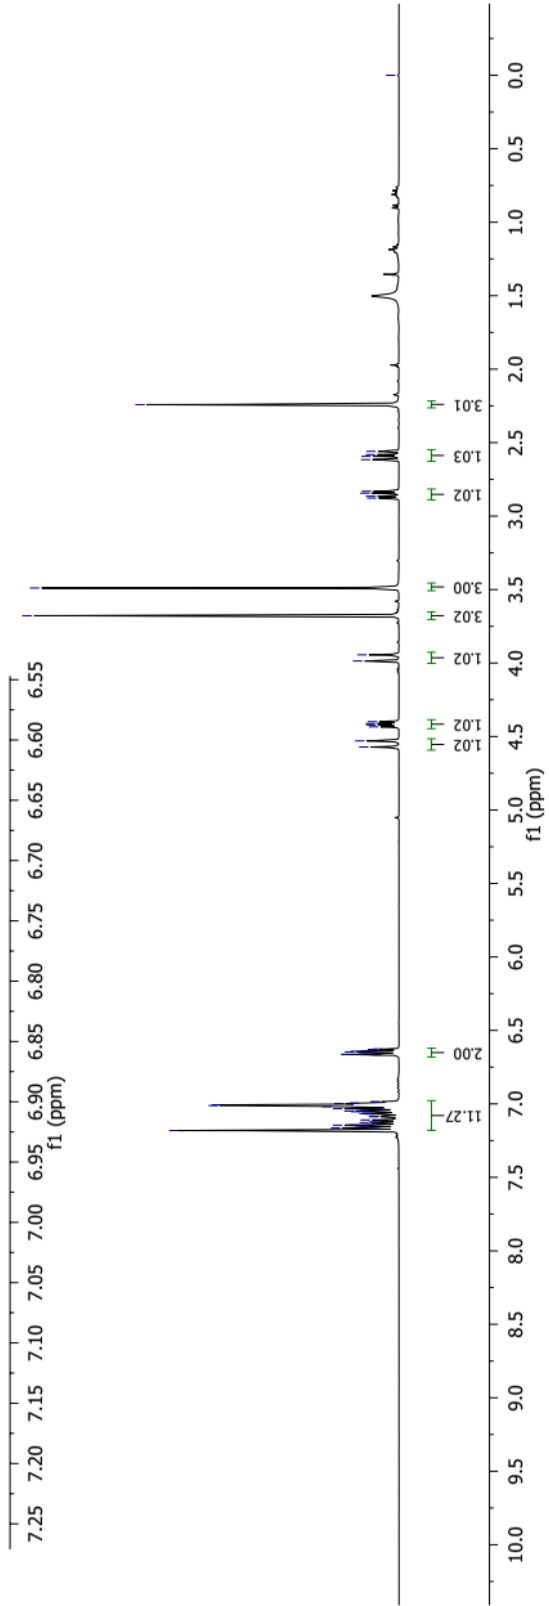

BKD-175-4-ME-13C

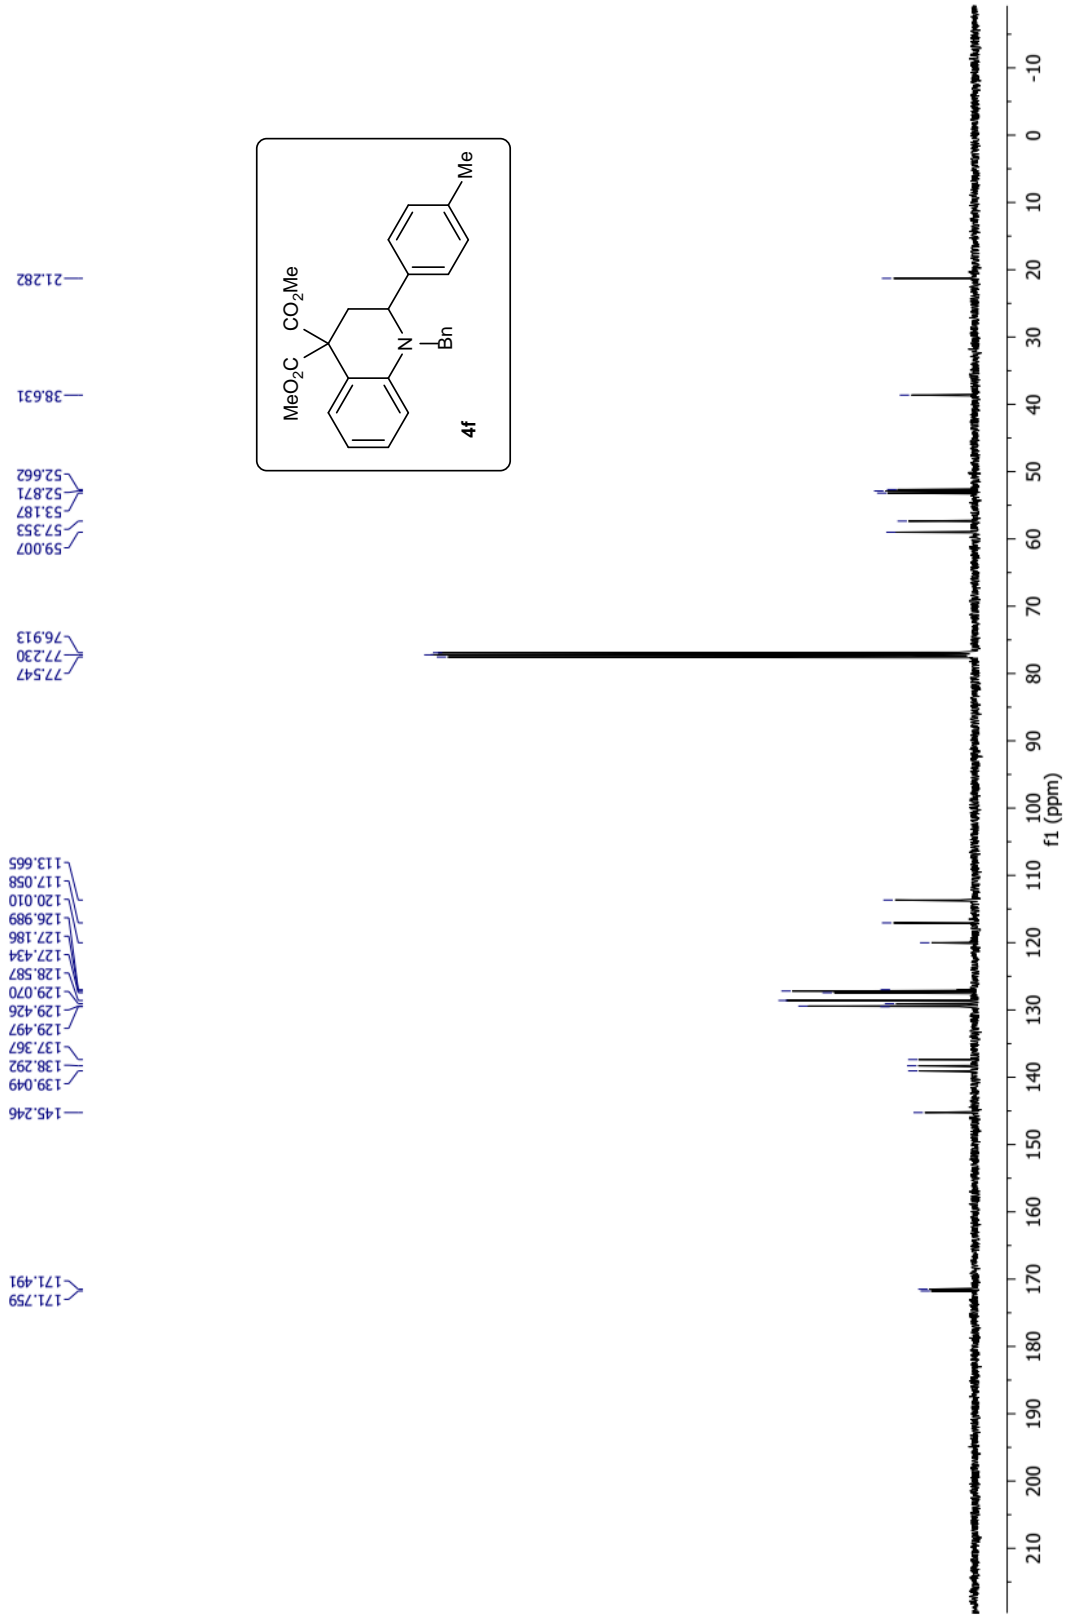



BKD-160-4-OME-13C

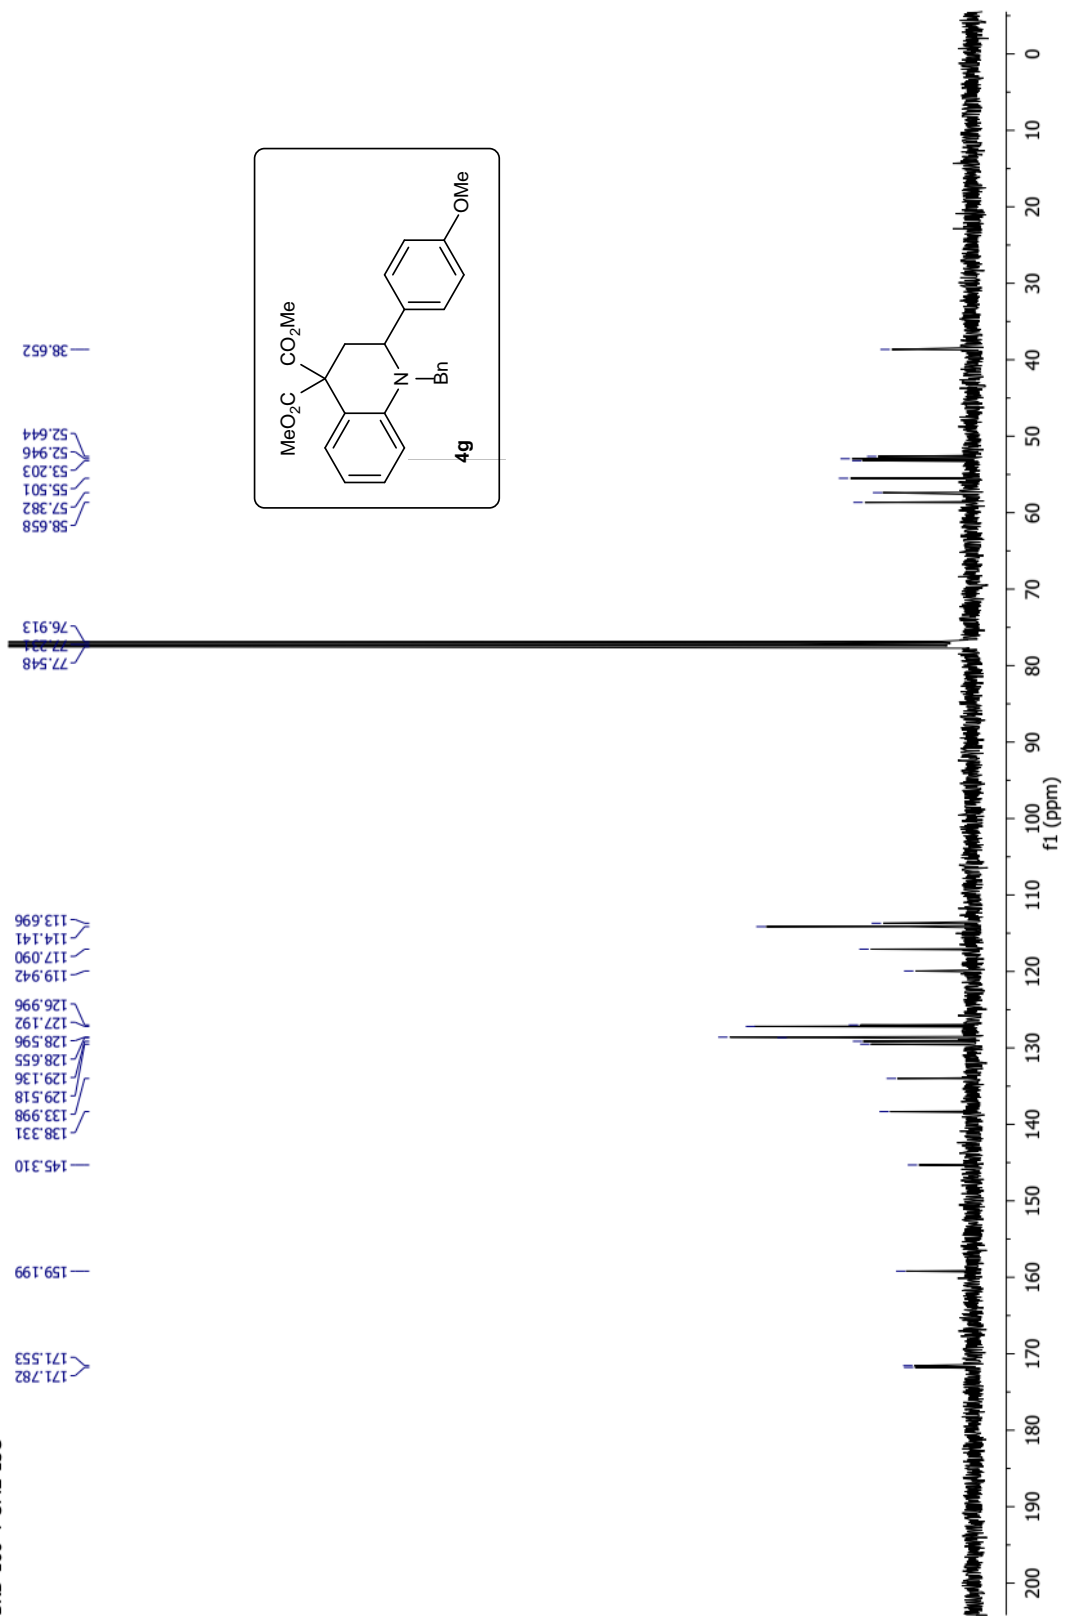



BKD-170-BPH-1H

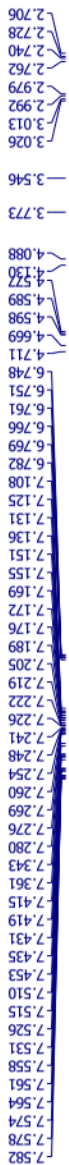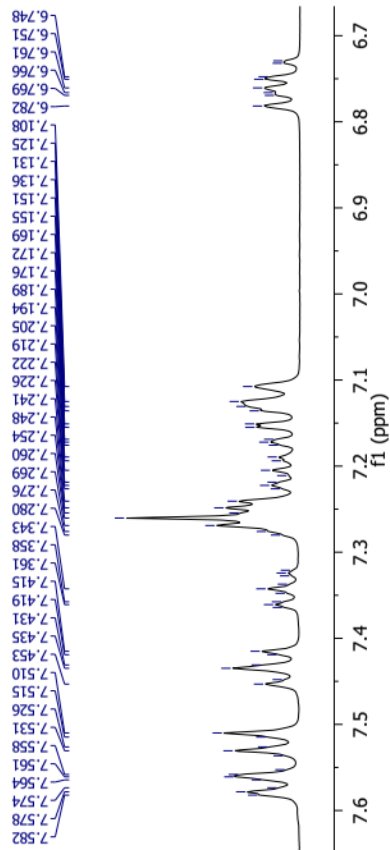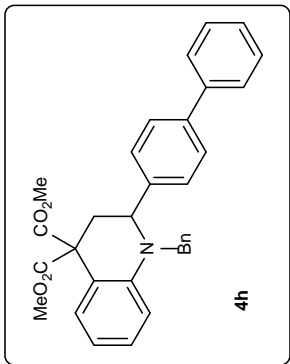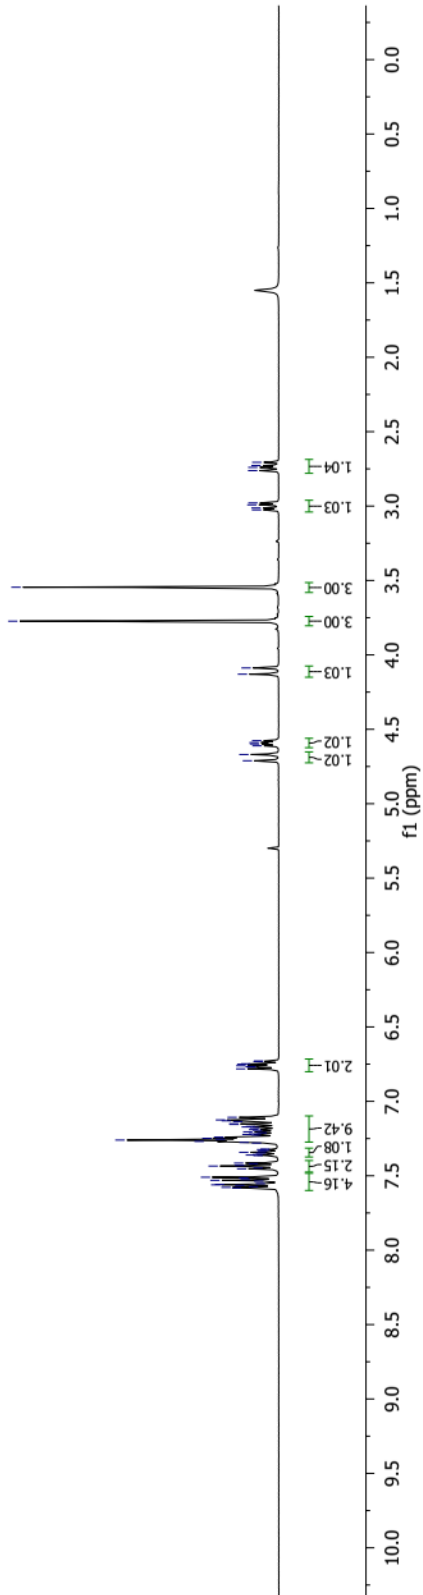

BKD-170-BPH-13C

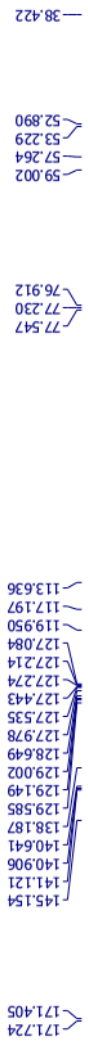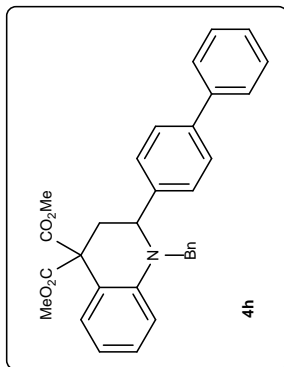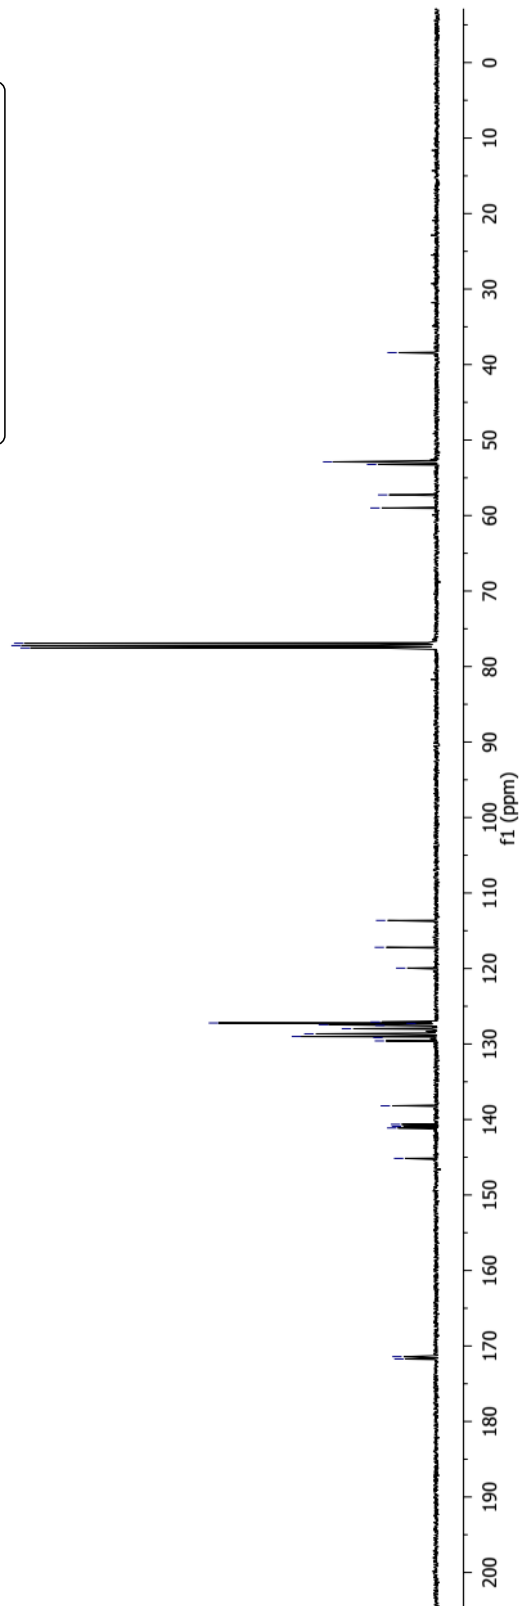

BKD-198-TBU-1H

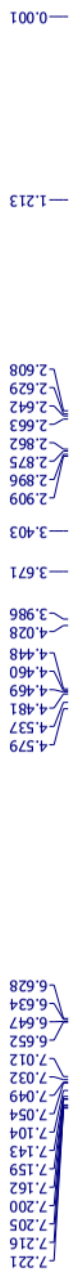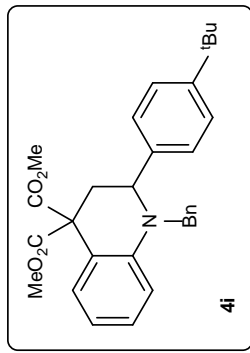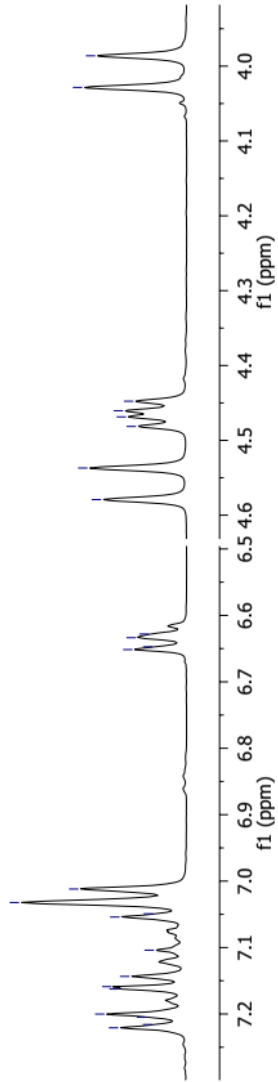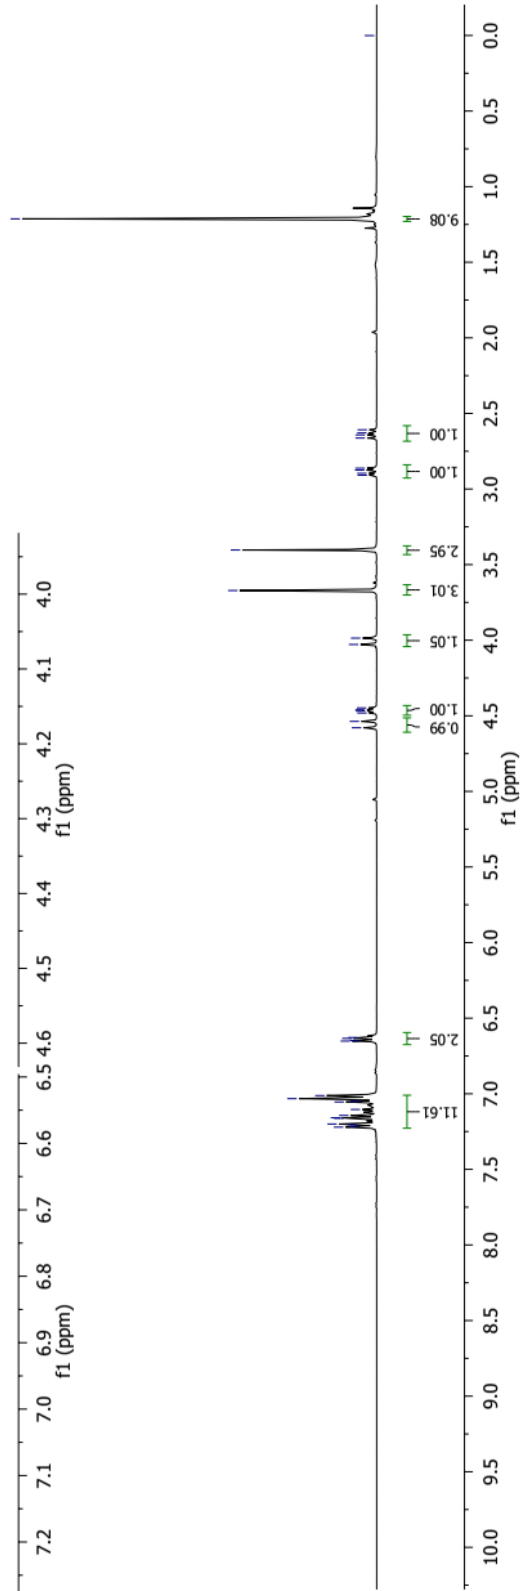

BKD-198-TBU-13C

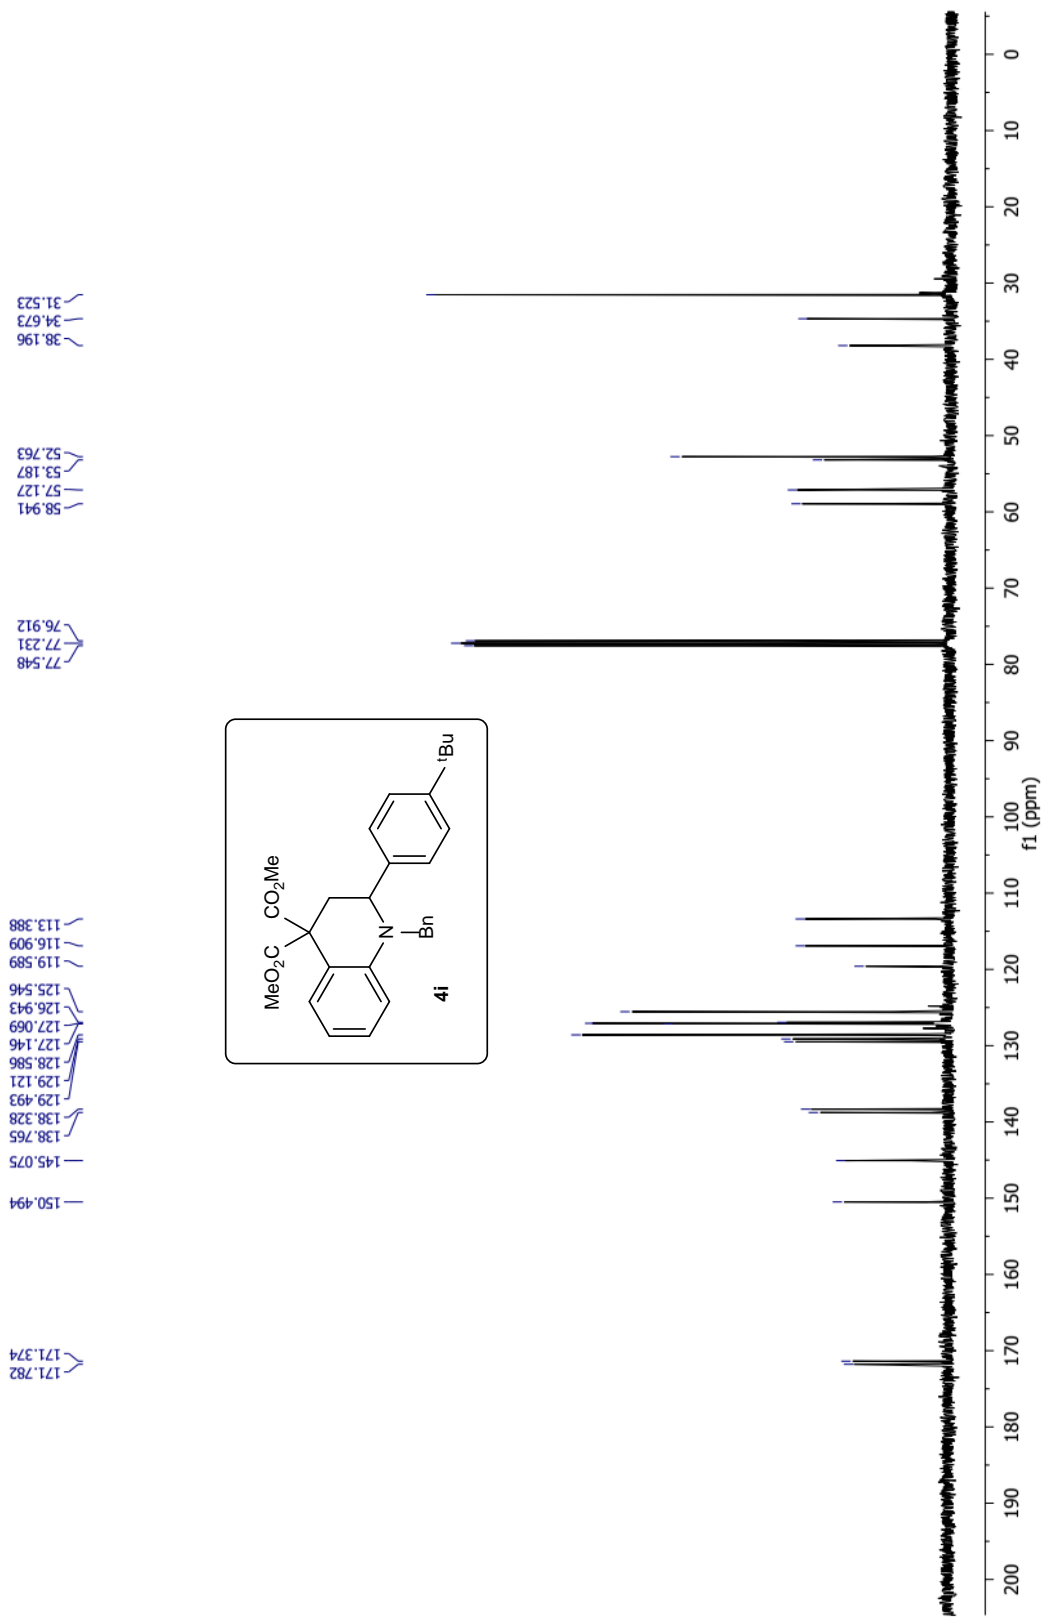

BKD-167-NPH-1H

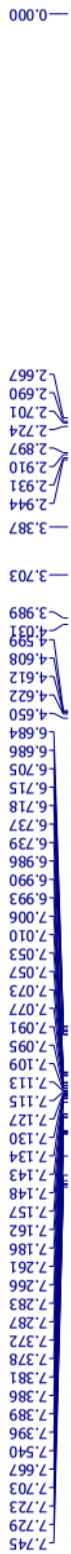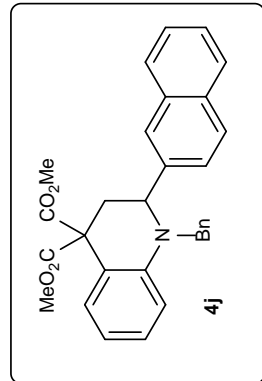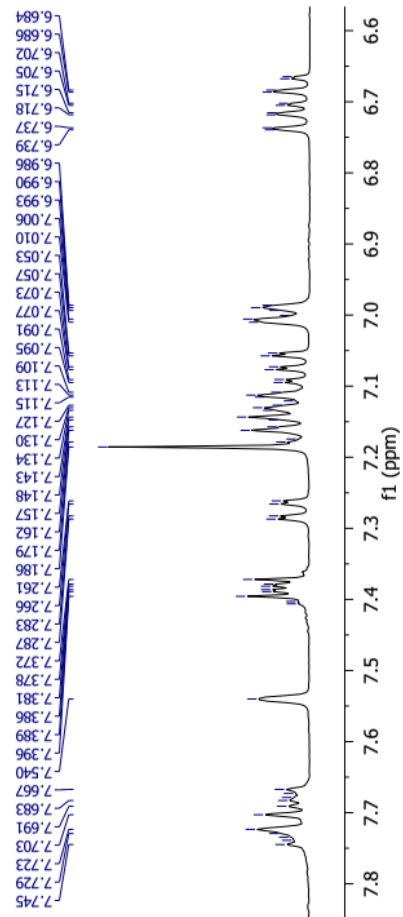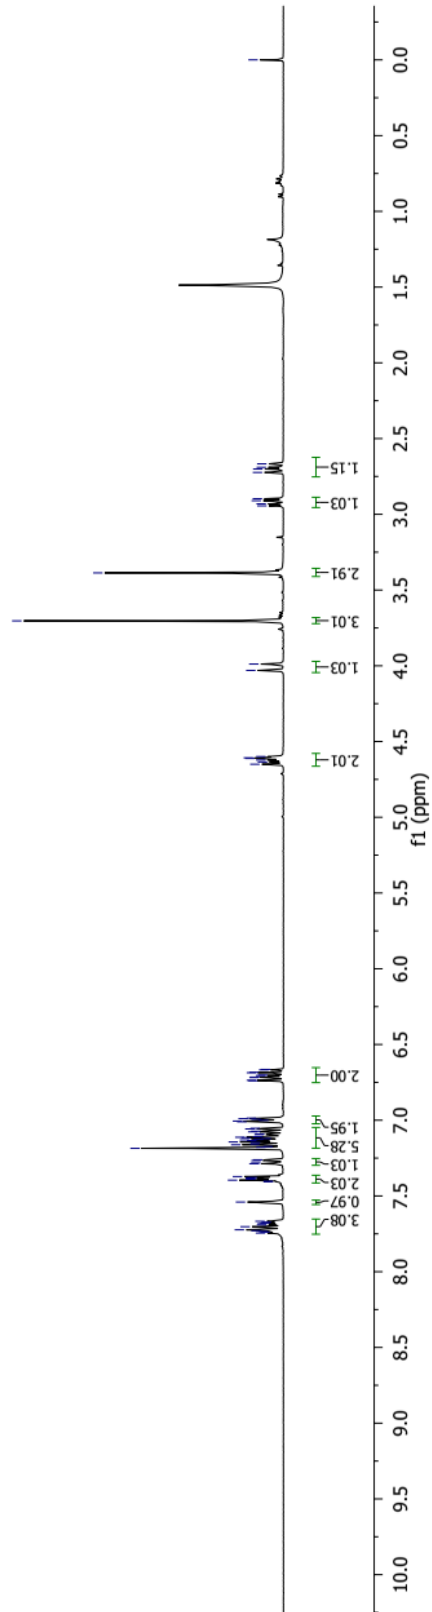

BKD-167-NPH-13C

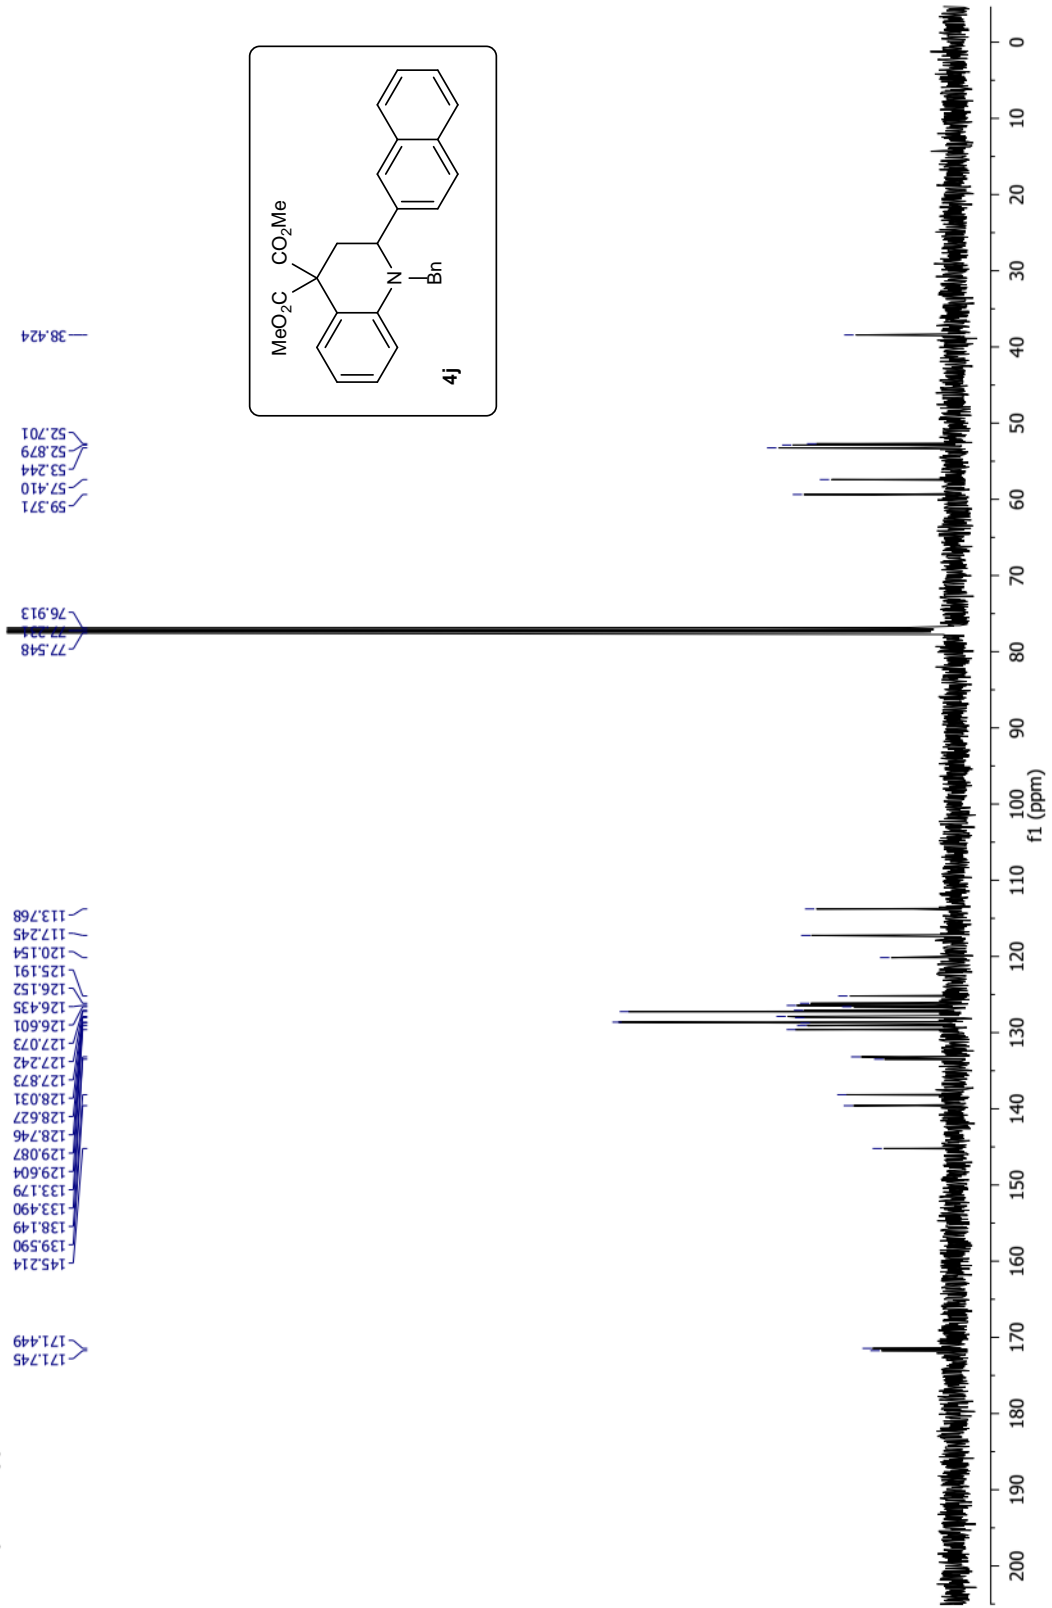



BKD-169-THP-13C

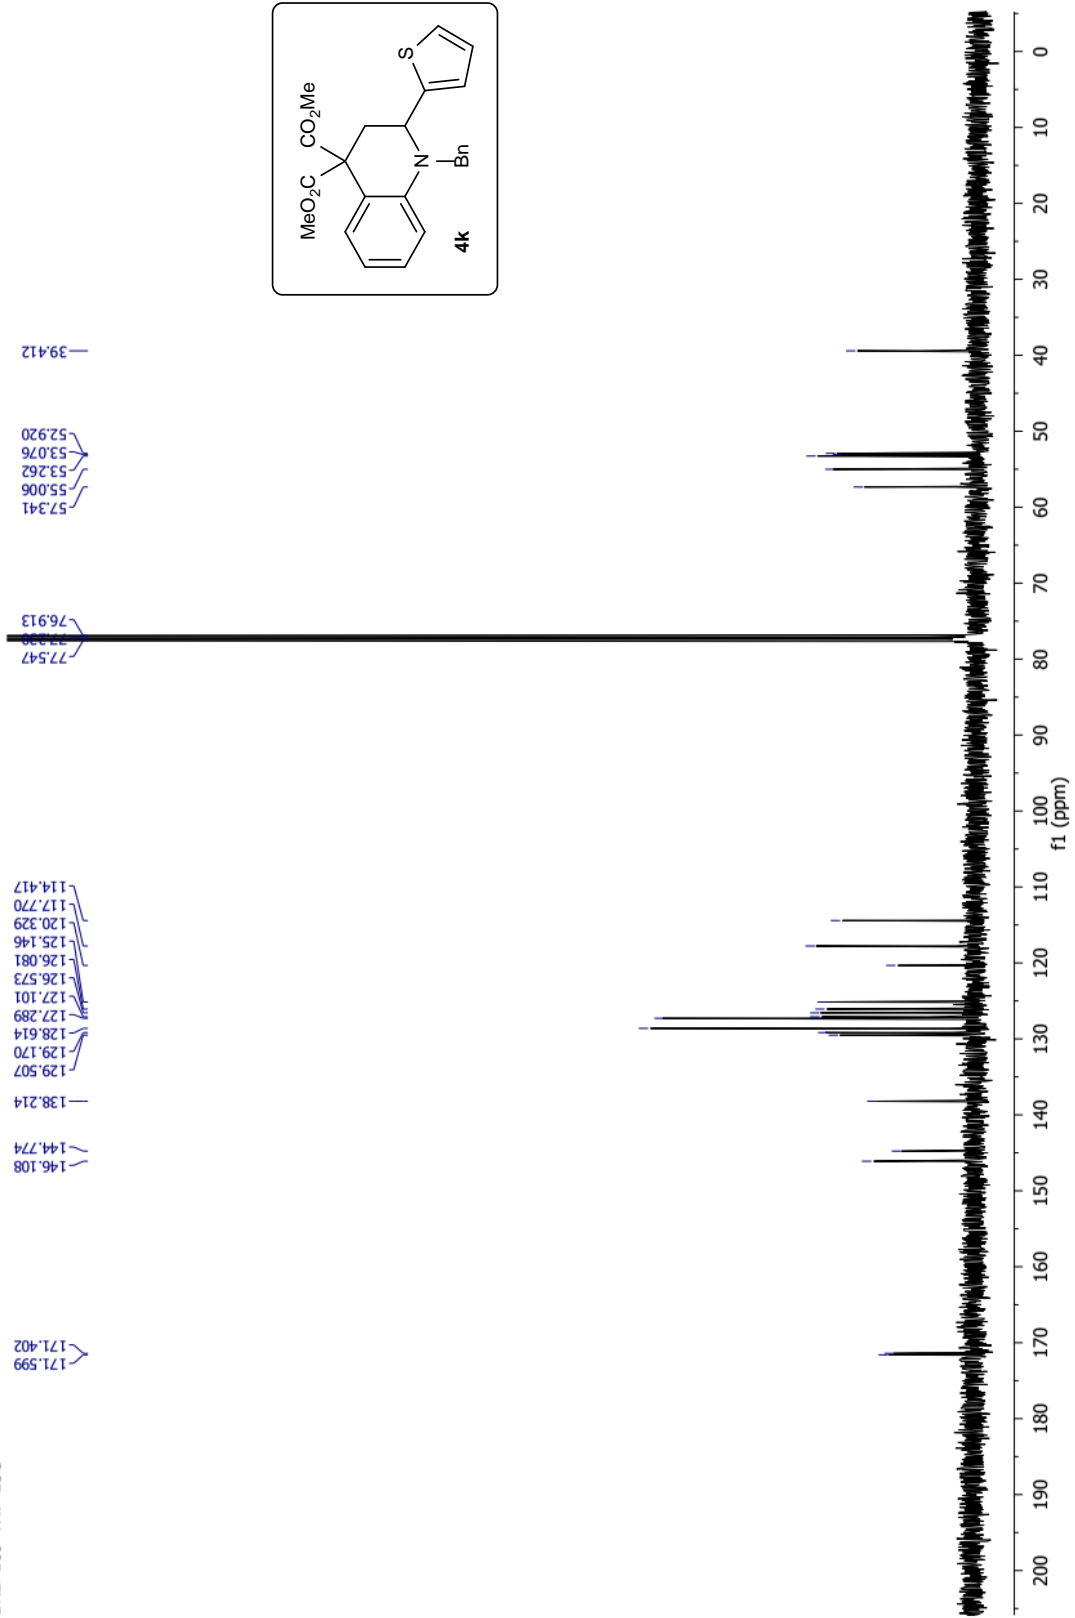



BKD-200-CO2ET-1H

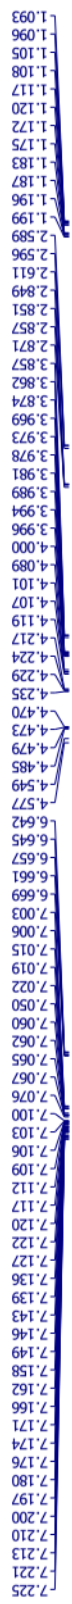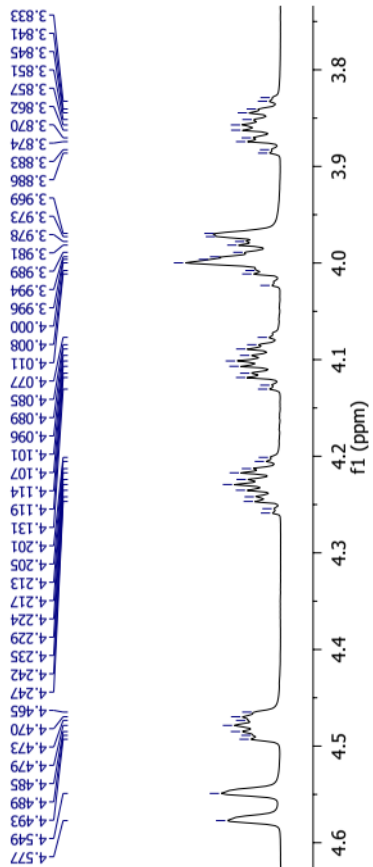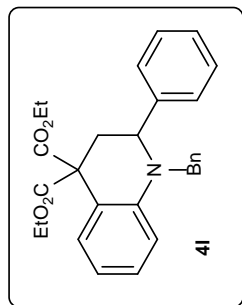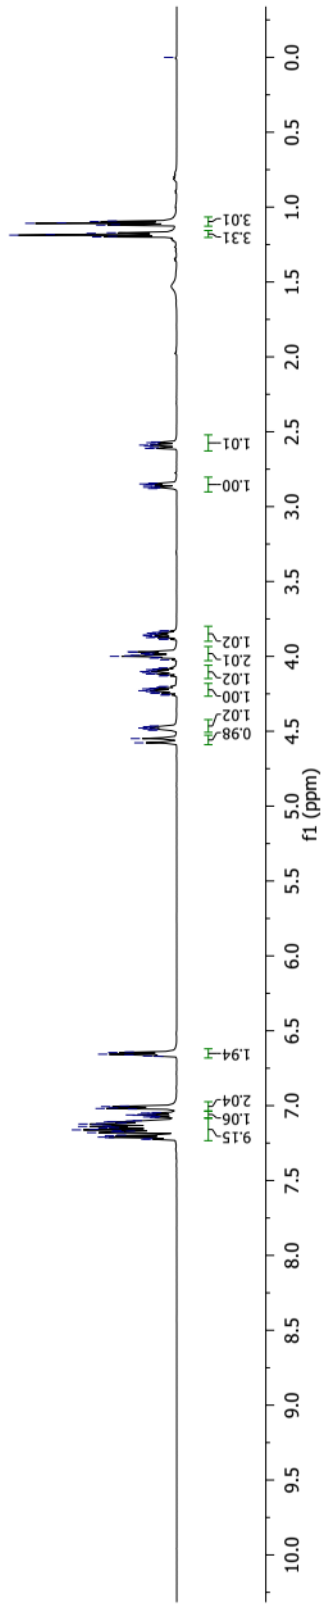

BKD-200-CO2ET-13C

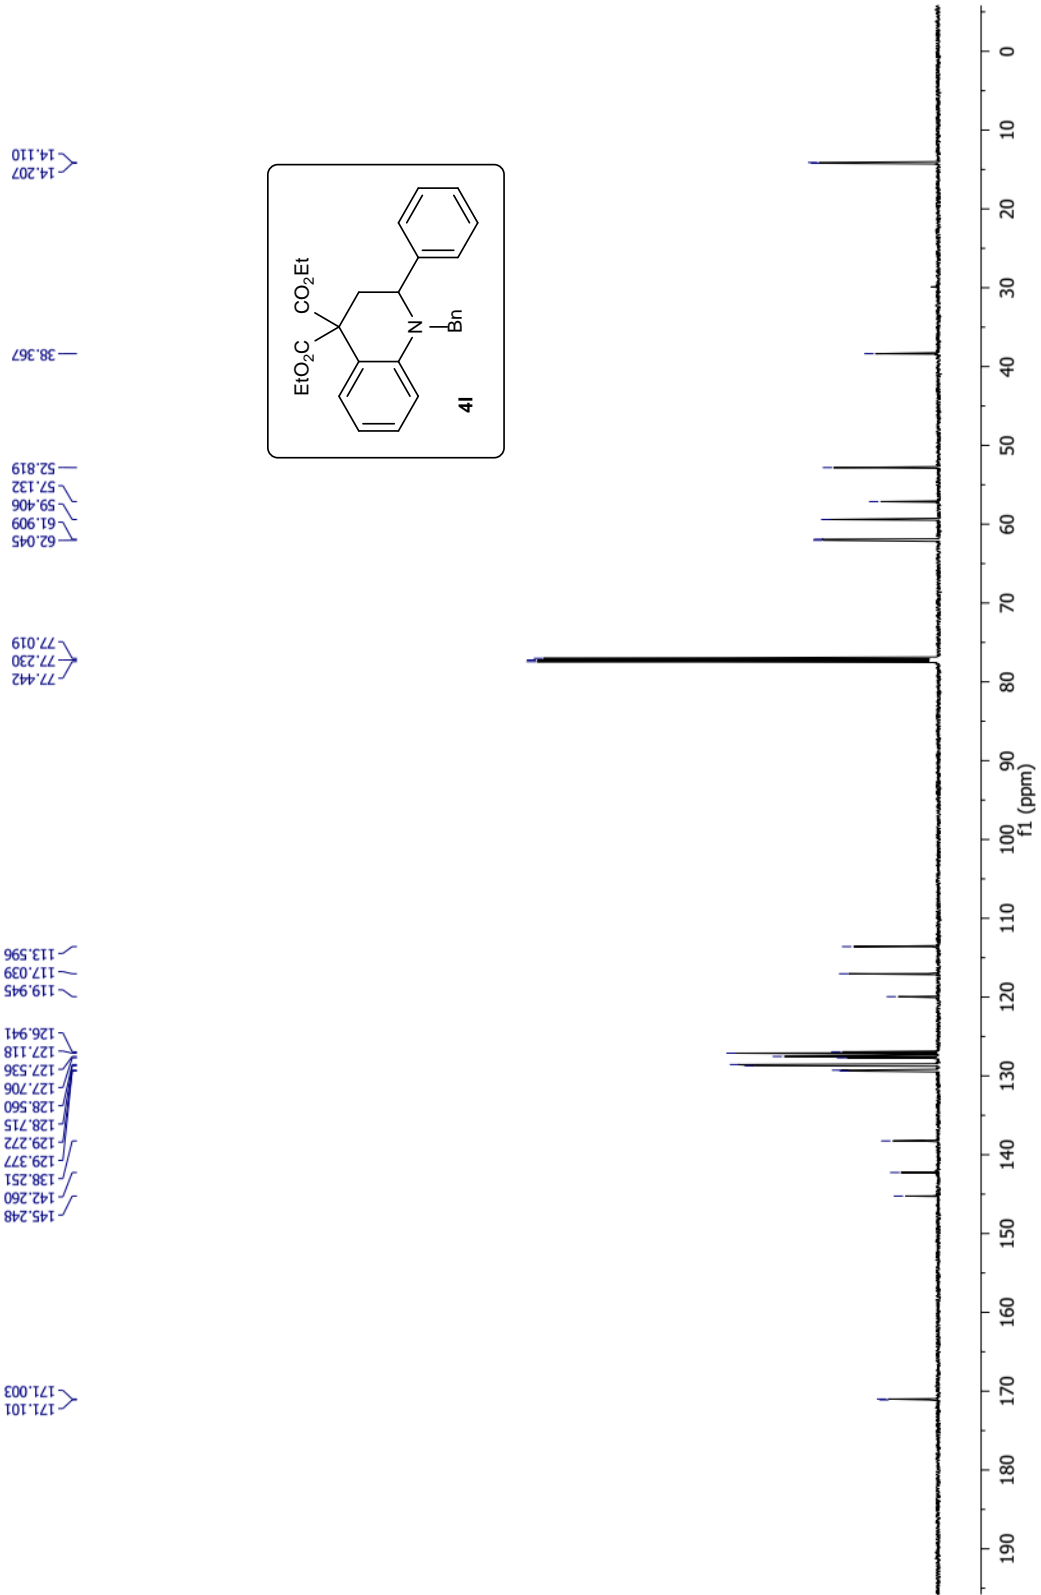



BKD-185-3-Cl-13C

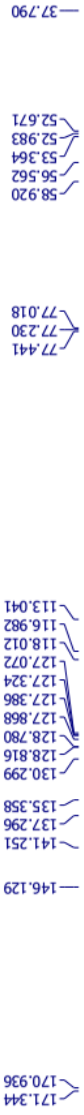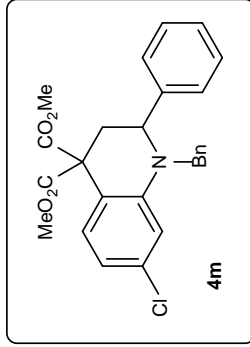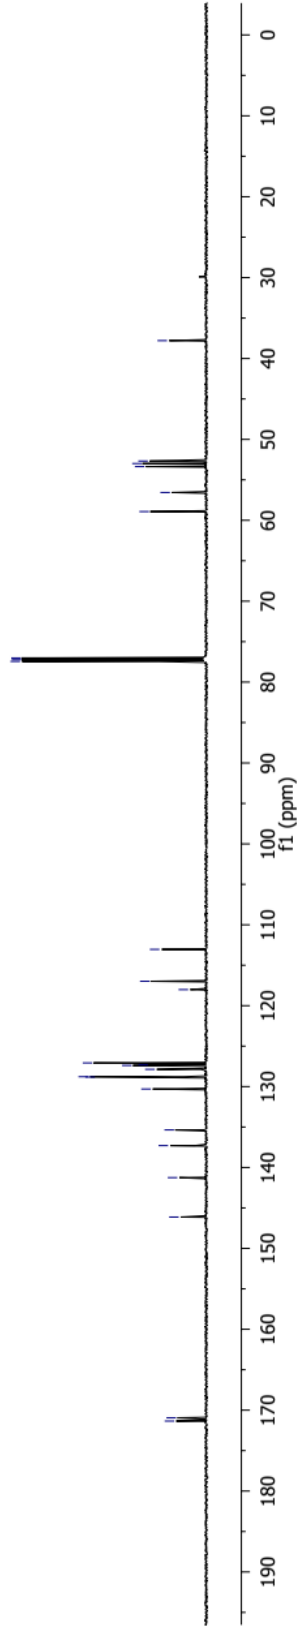

BKD-187-3-ME-1H

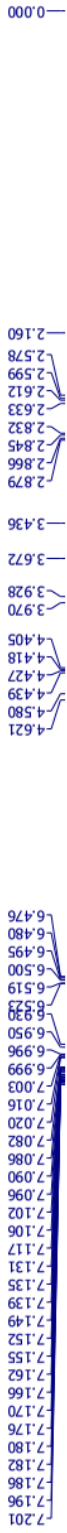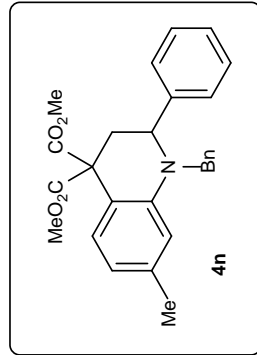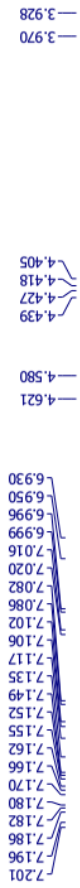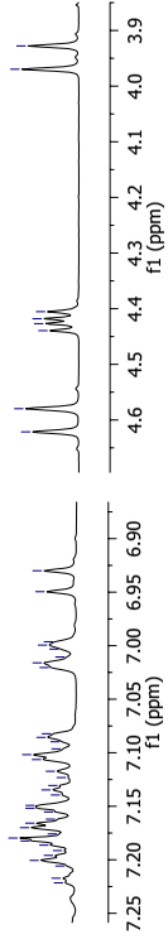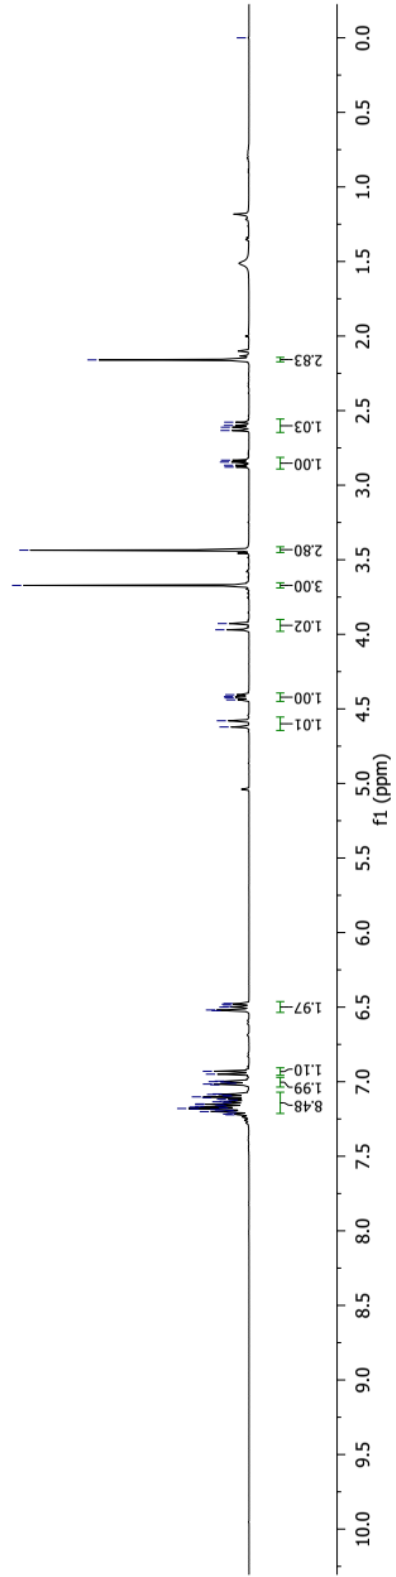

BKD-187-3-ME-13C

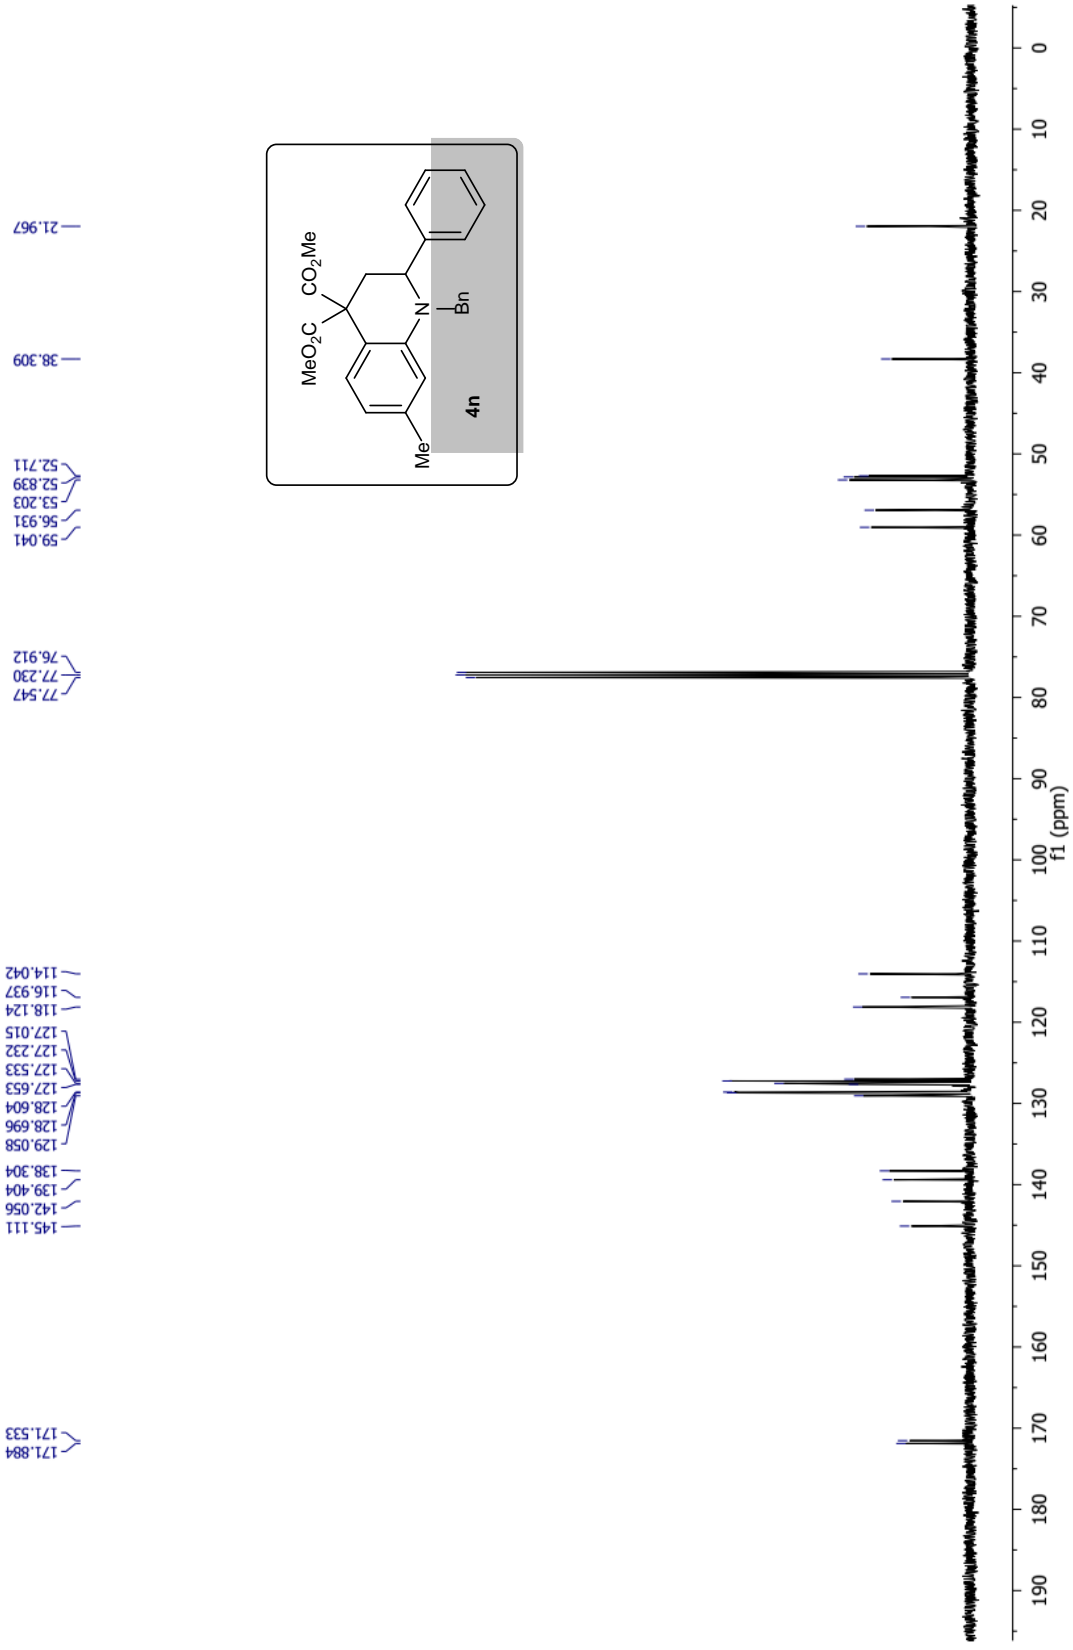

BKD-178-4-BR-AM-1H

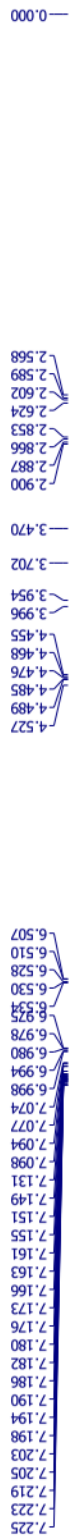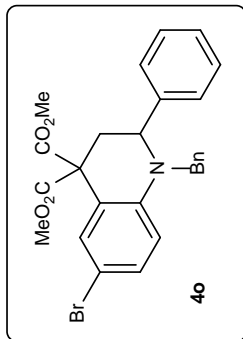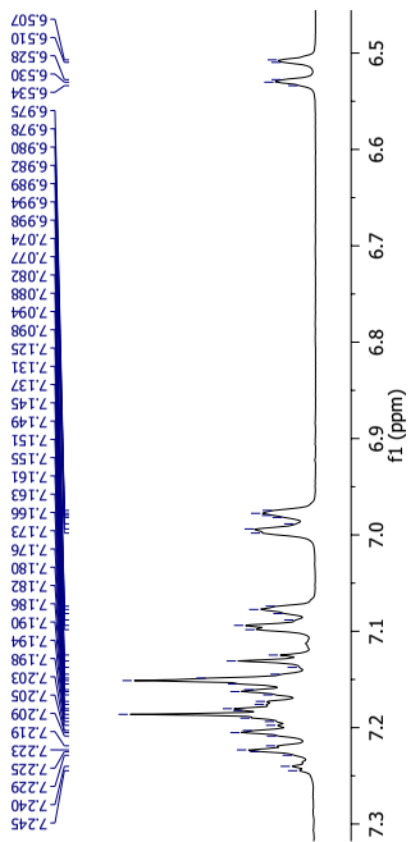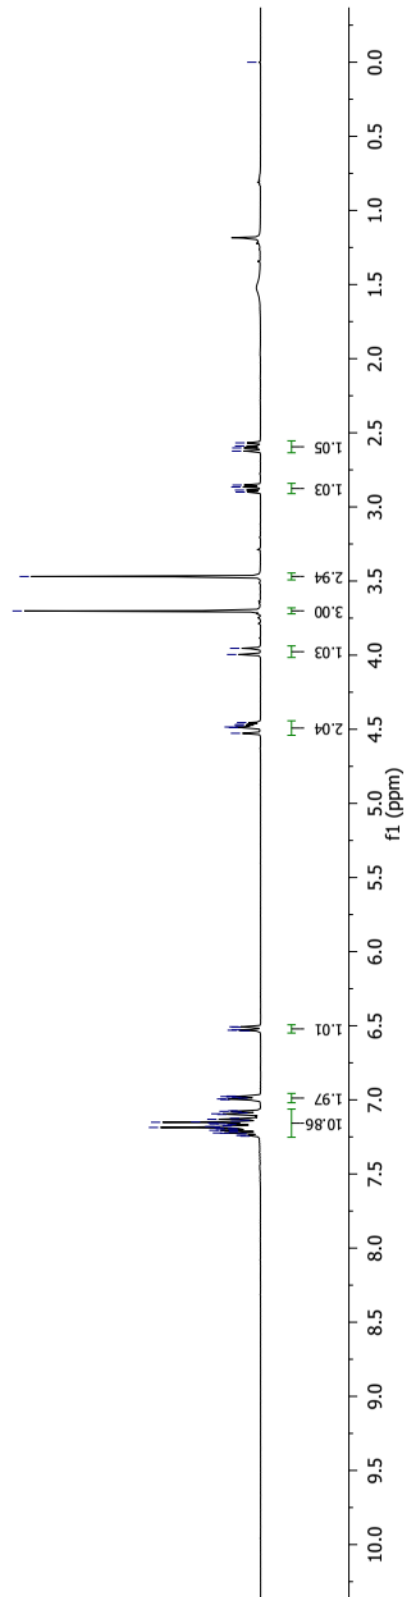

BKD-178-4-BR-AM-13C

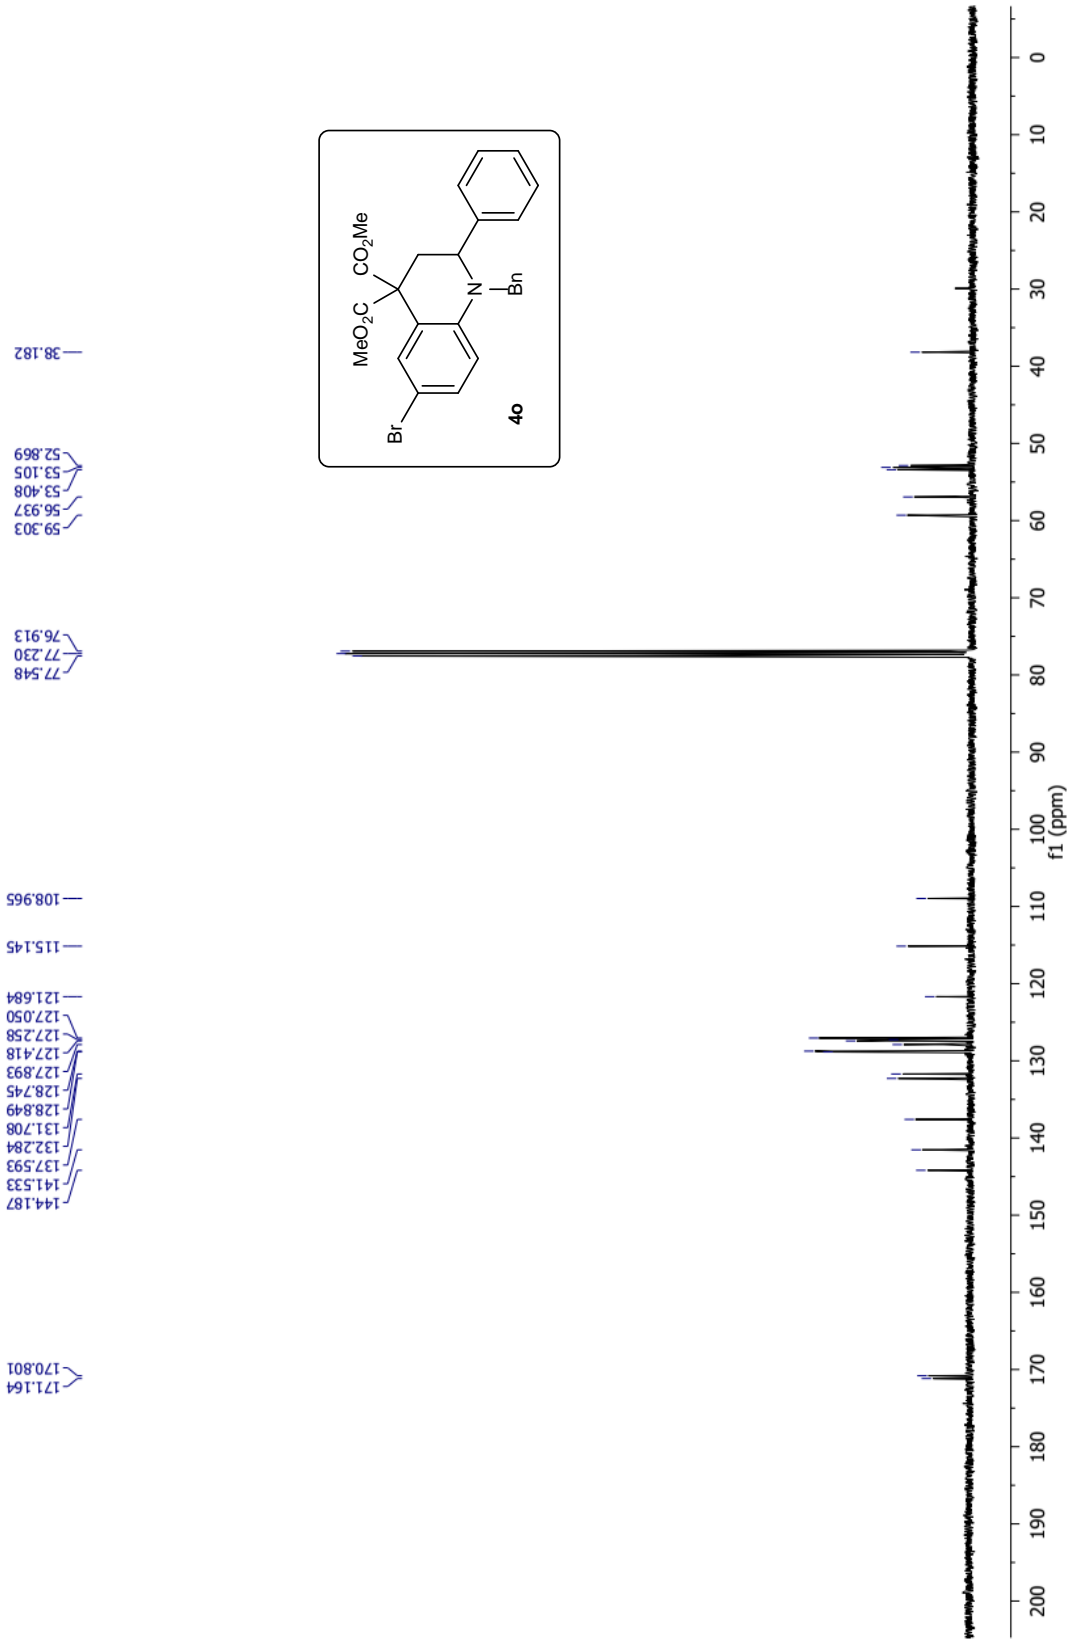



BKD-176-4CL-AM-1H

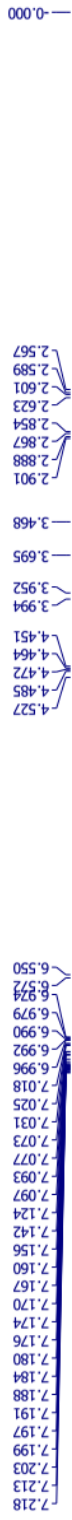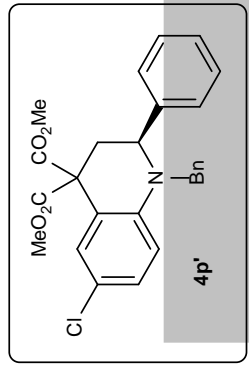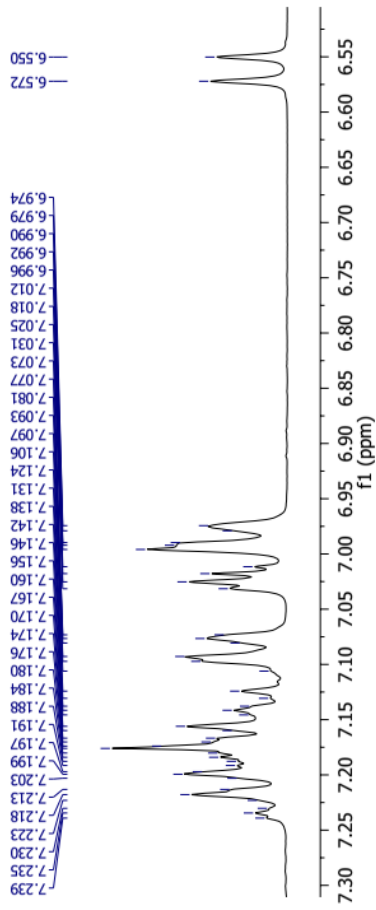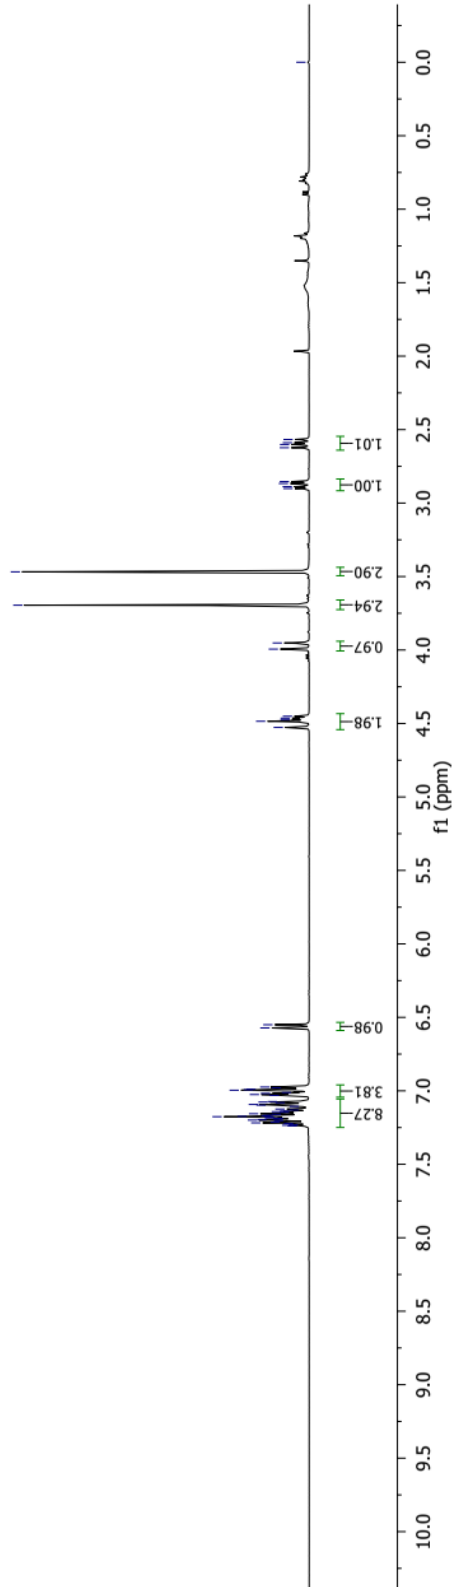

BKD-176-4CL-AM-13C

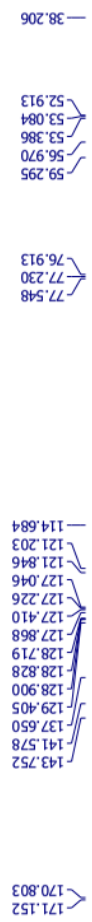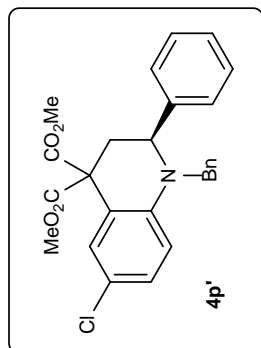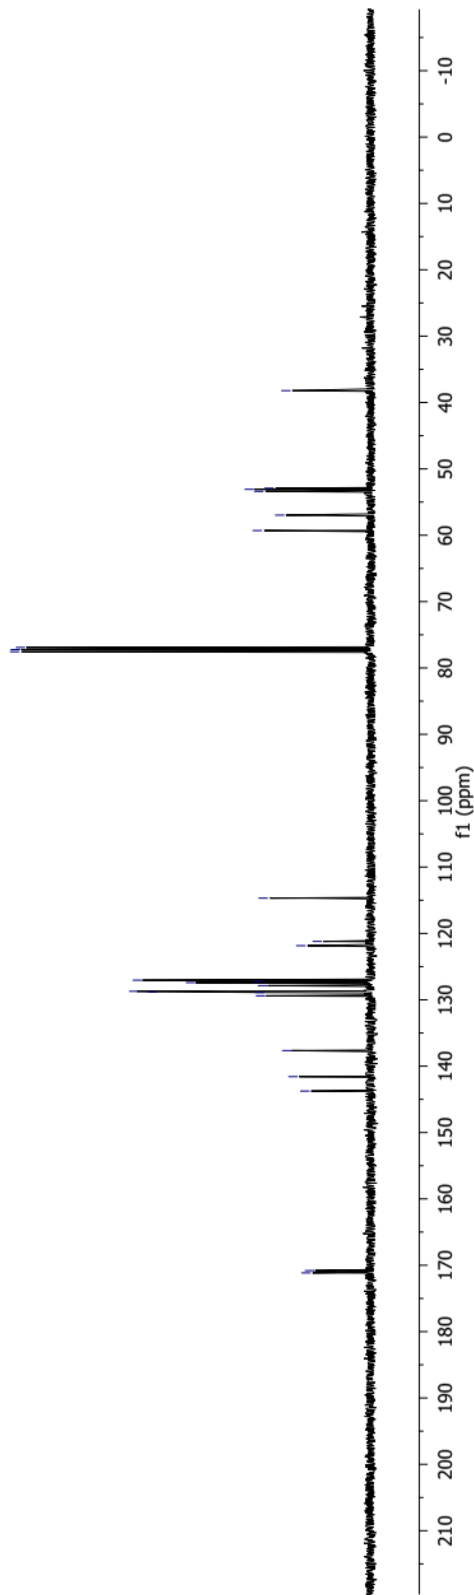



BKD-179-4-F-13C

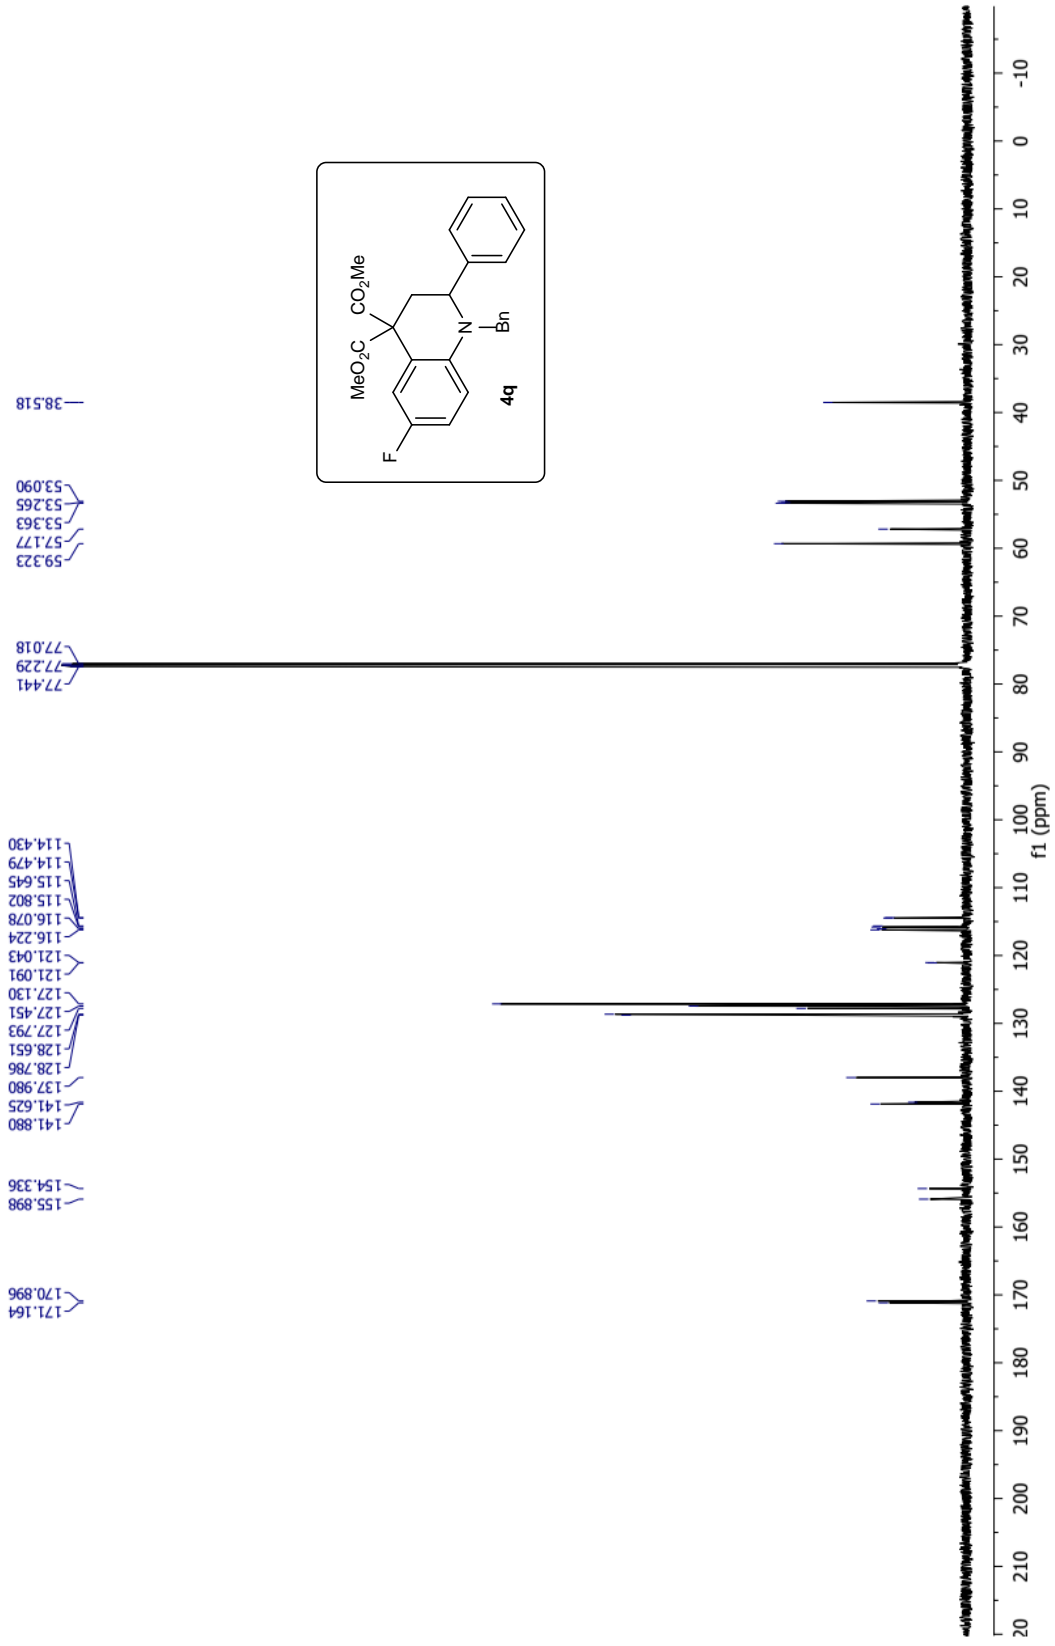

BKD-179-4F-19F

— -127.871

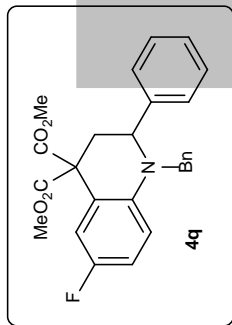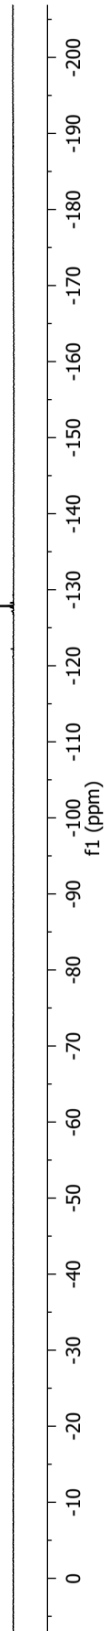



BKD-189-ISP-13C

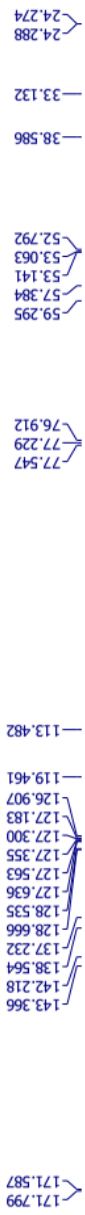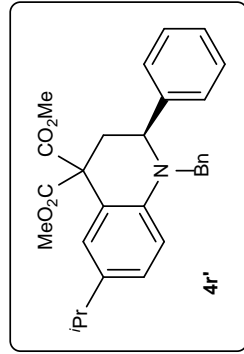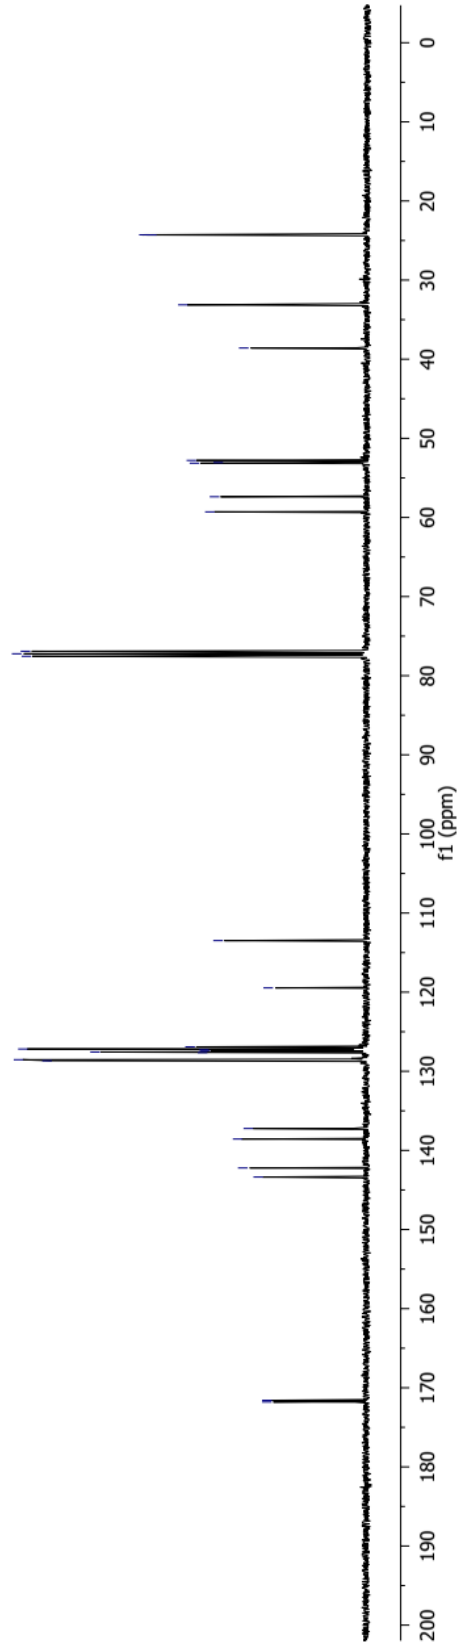





BKD-182-CO2ET-13C

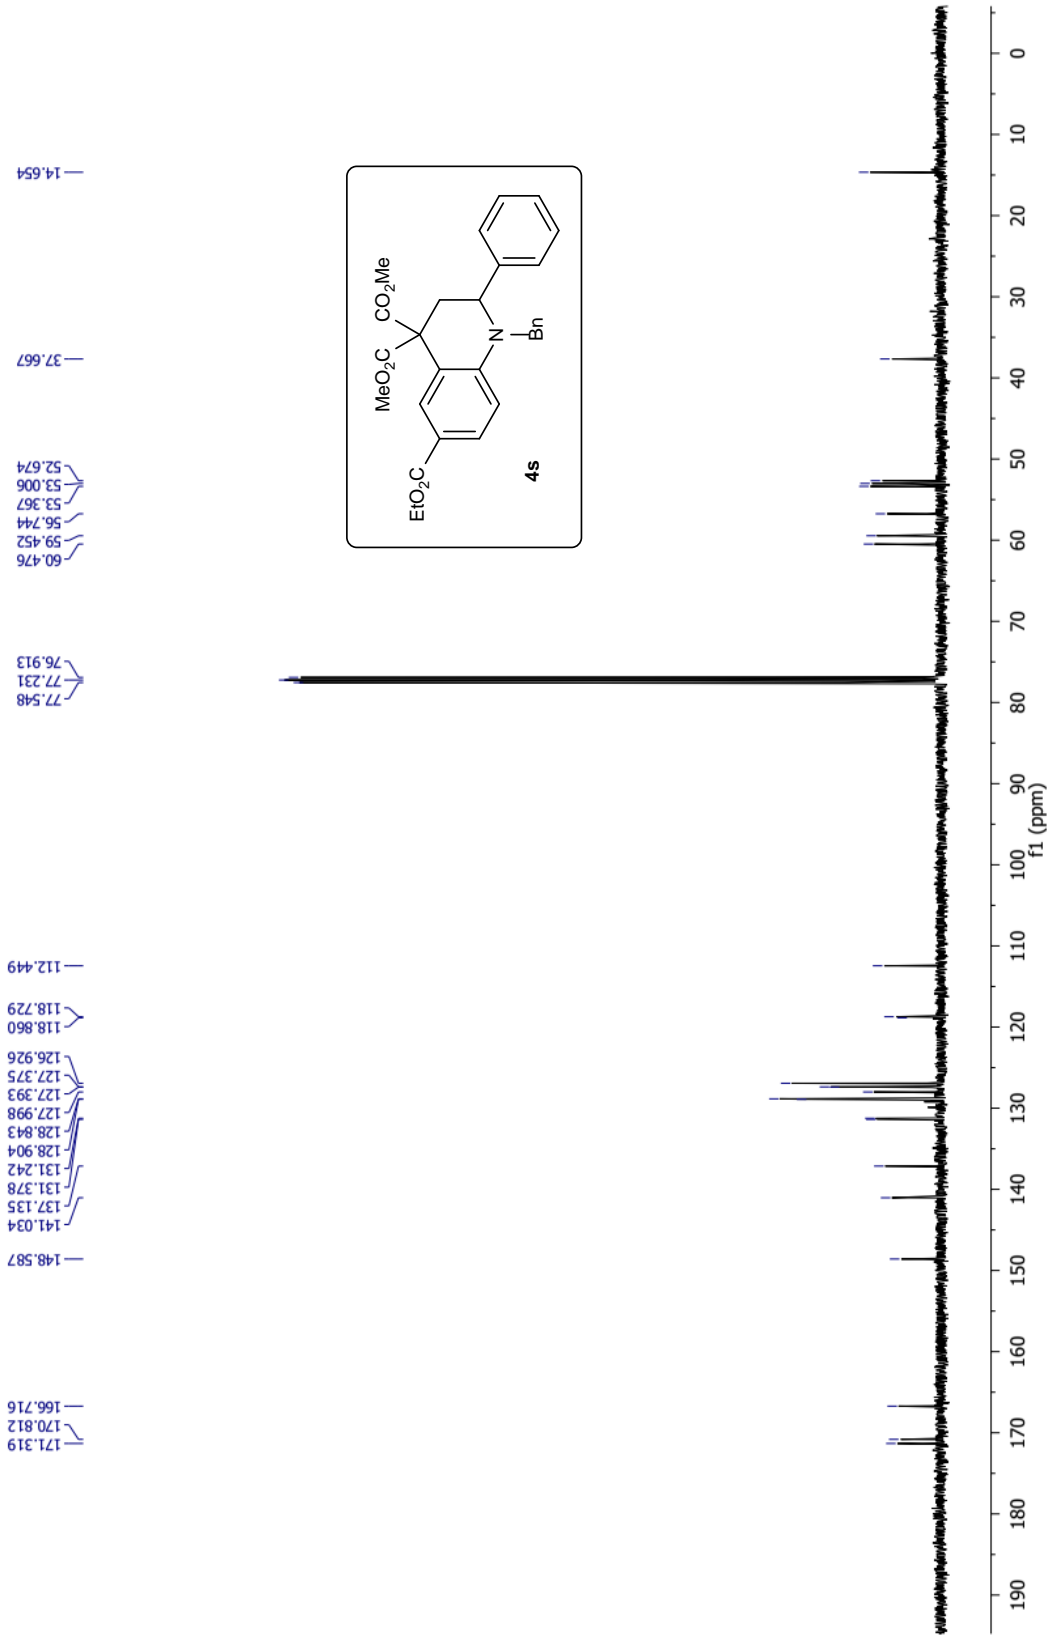

BKD-181-CF3-1H

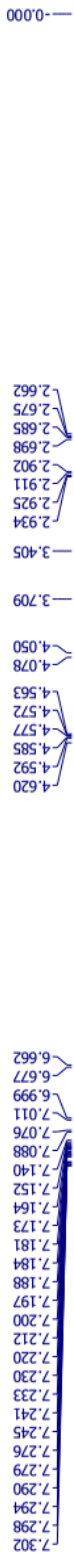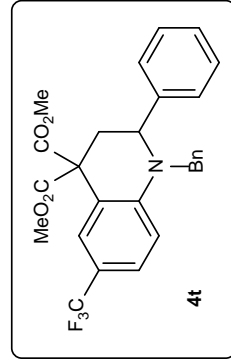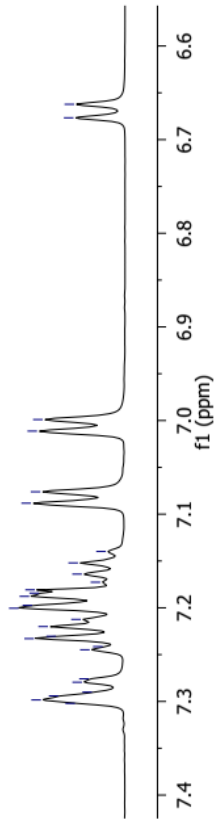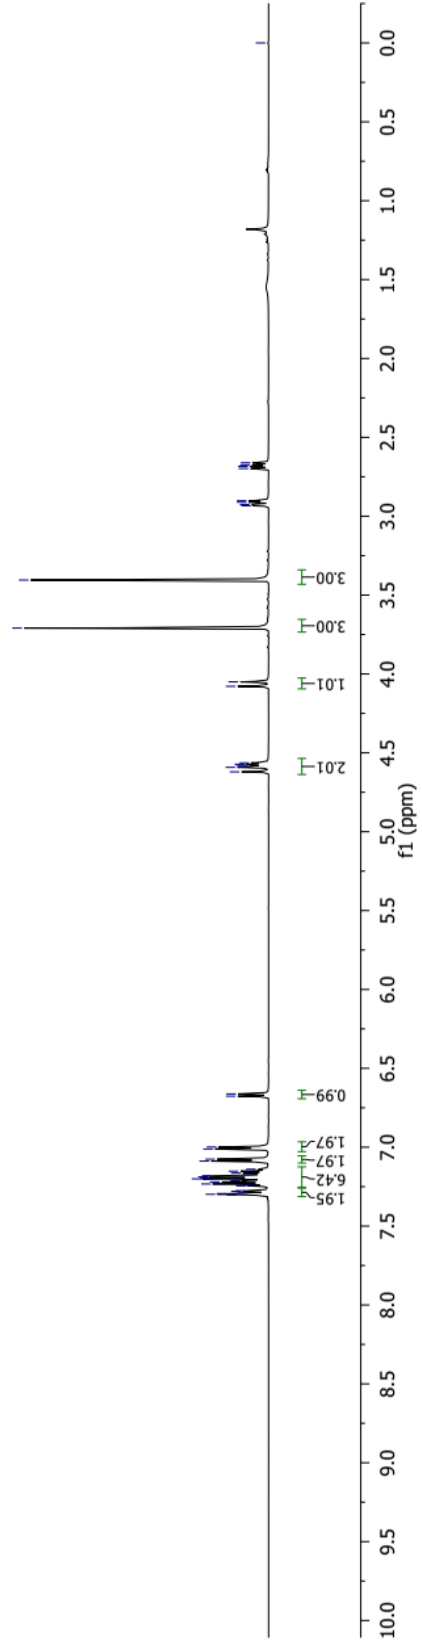

BKD-181-CF3-13C

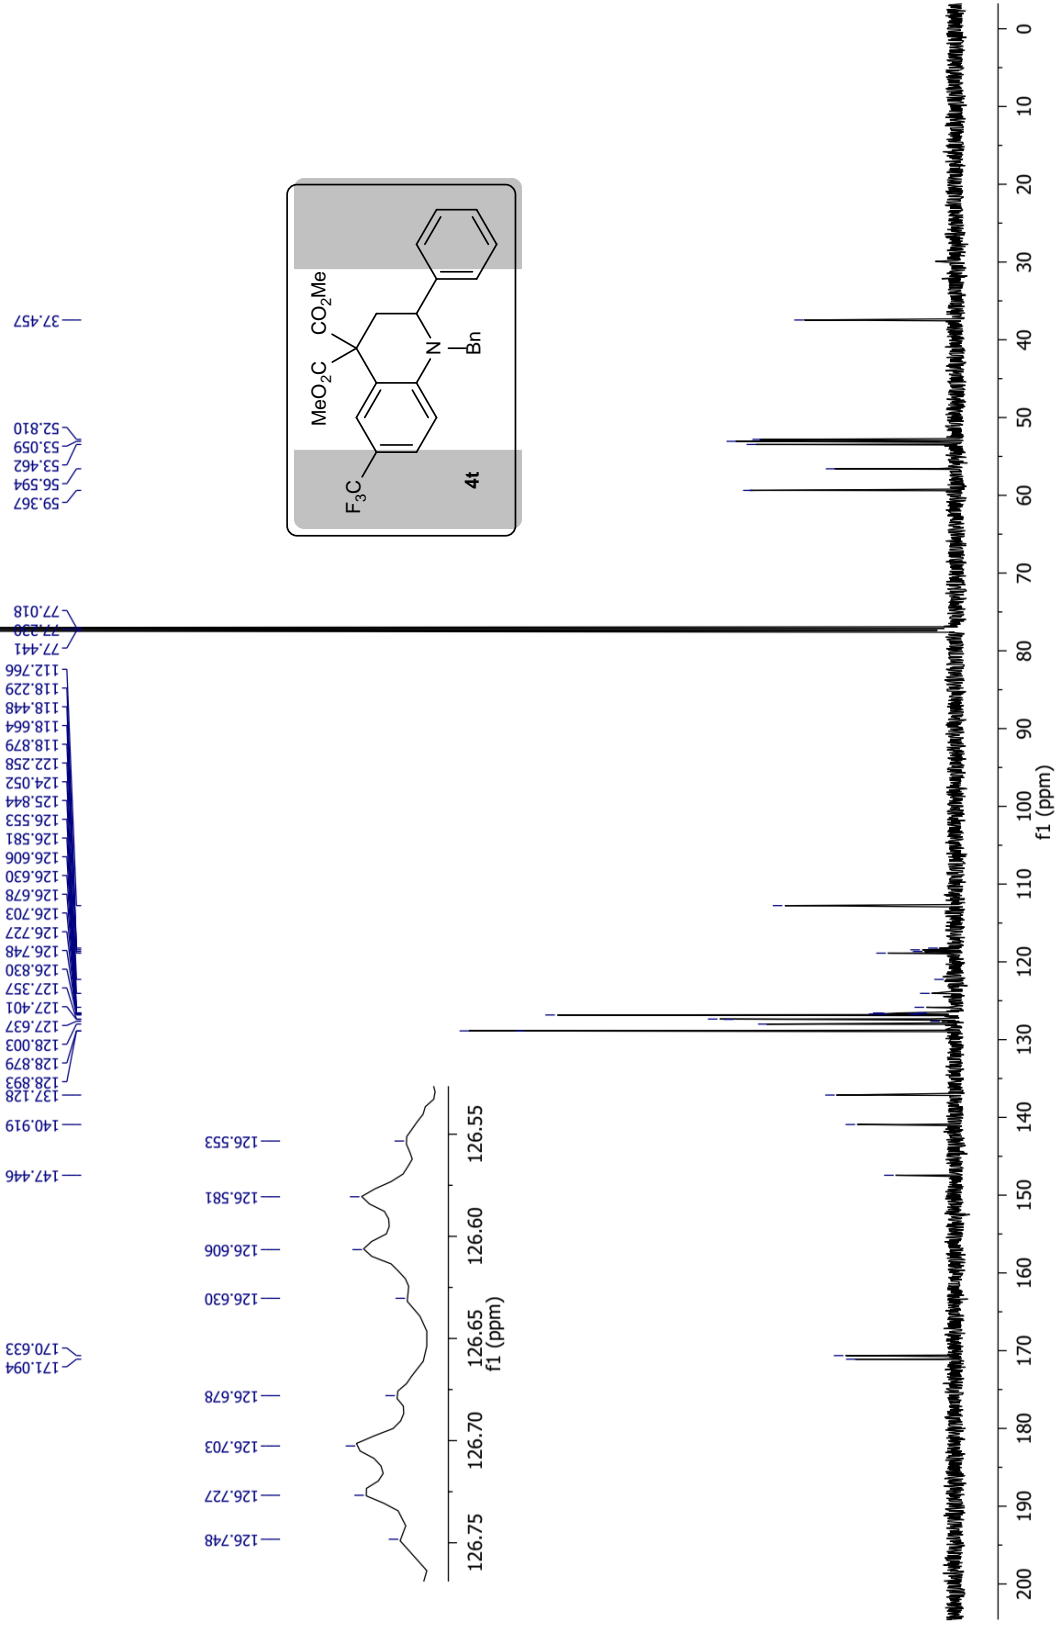

BKD-181-CF3-19F

— -61.022

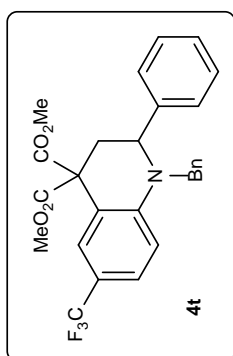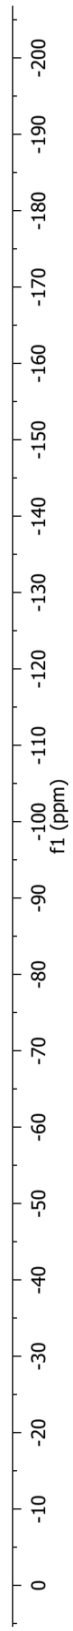

BKD-177-OCF3-1H

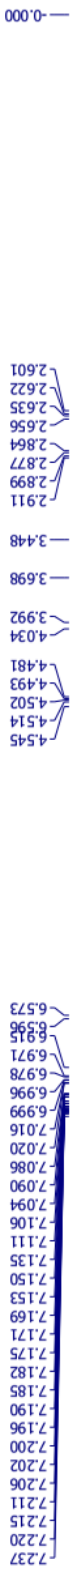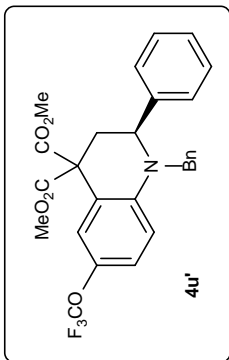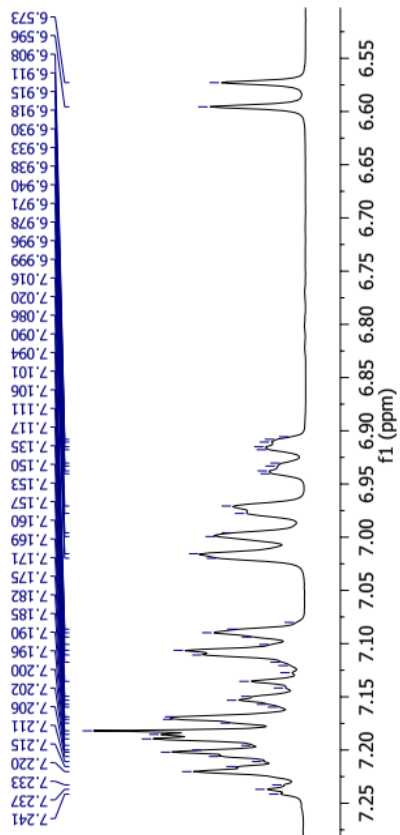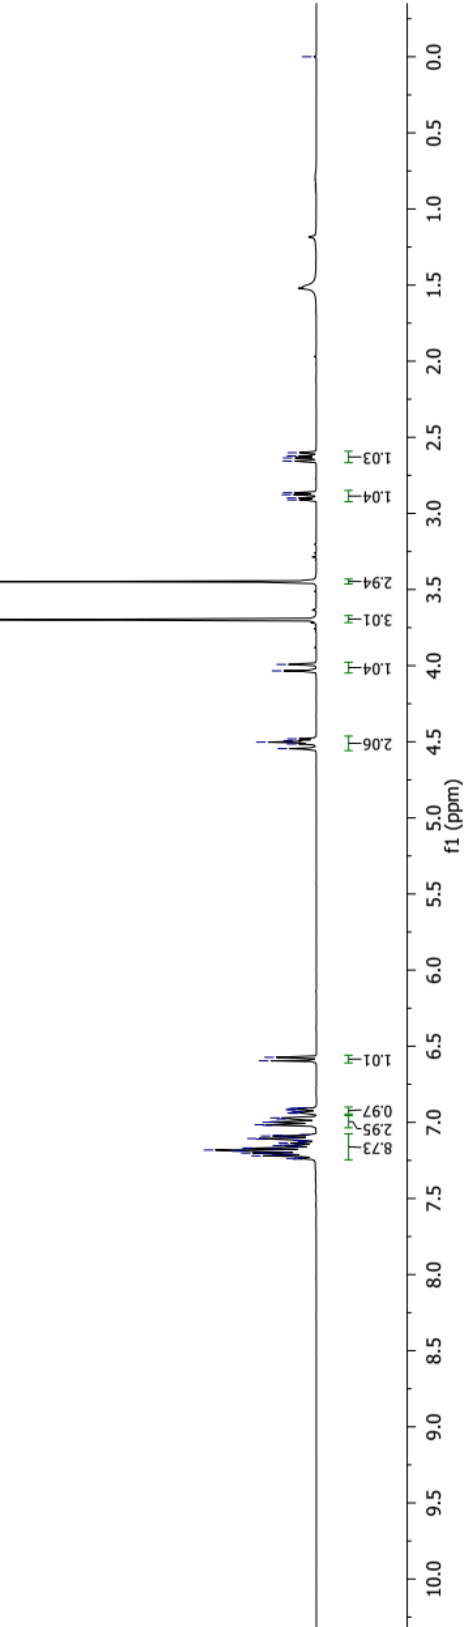

BKD-177-OCF3-13C

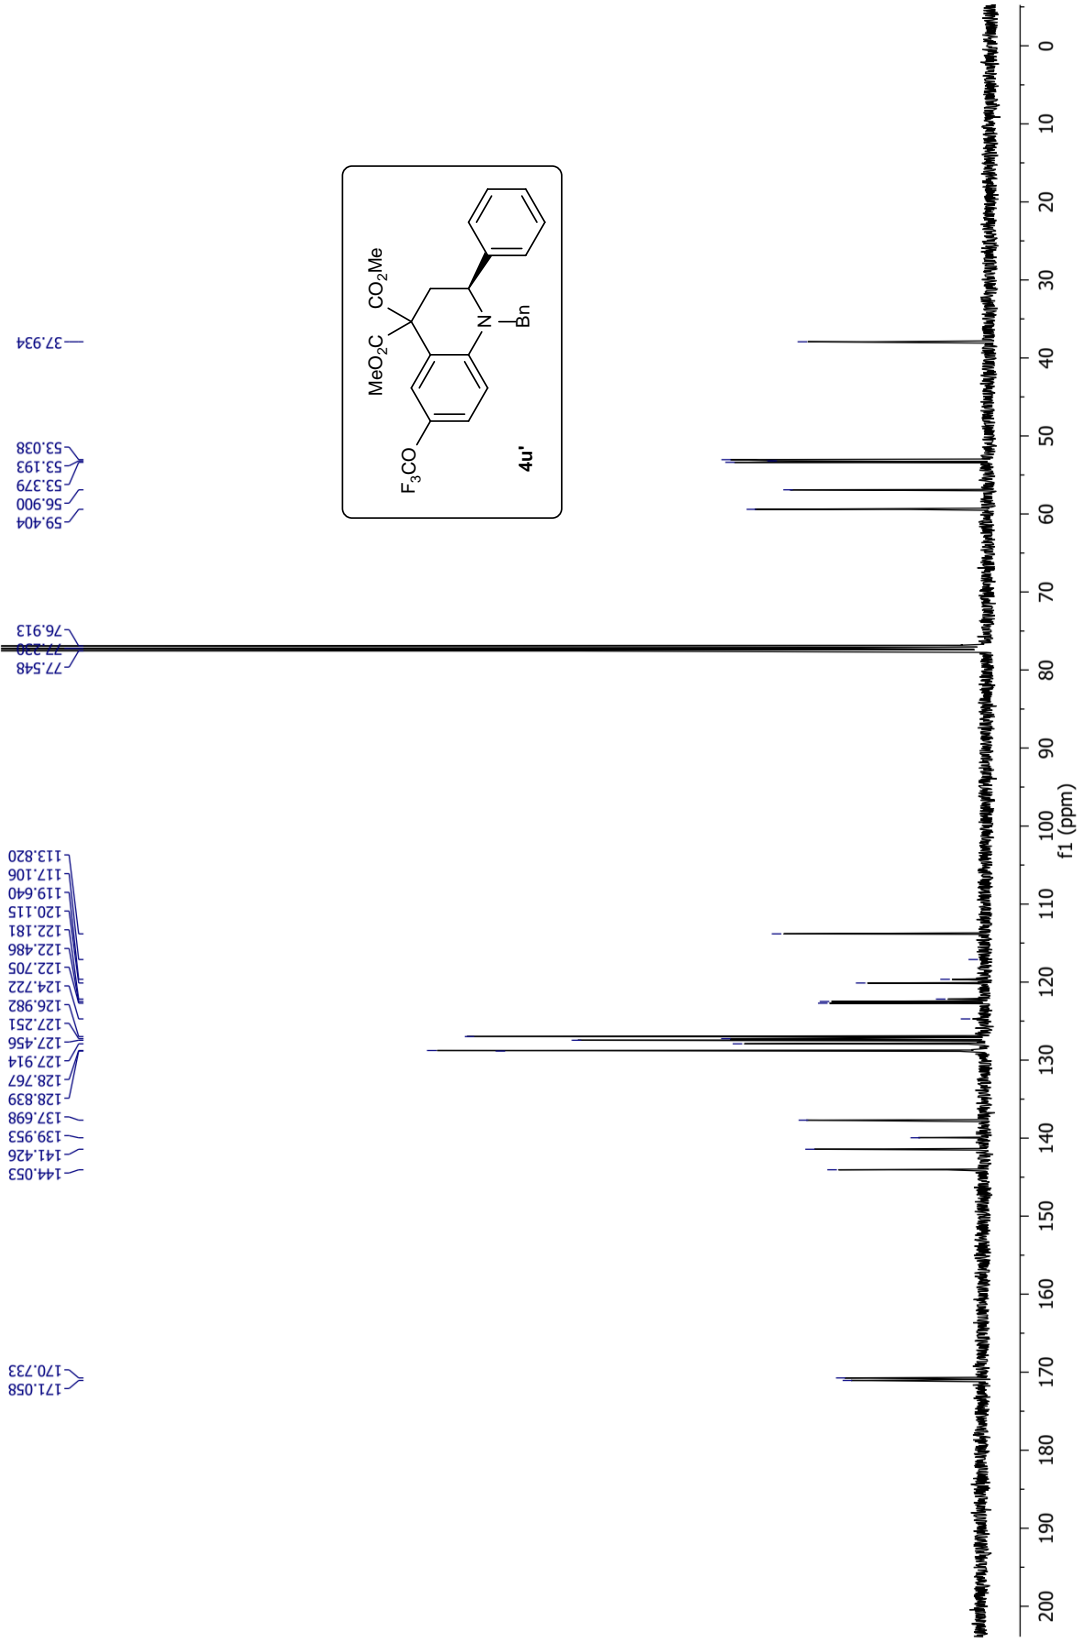

BKD-177-OCF3-19F

— 58.388

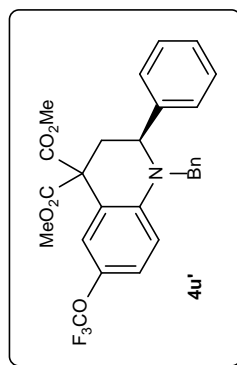

S79

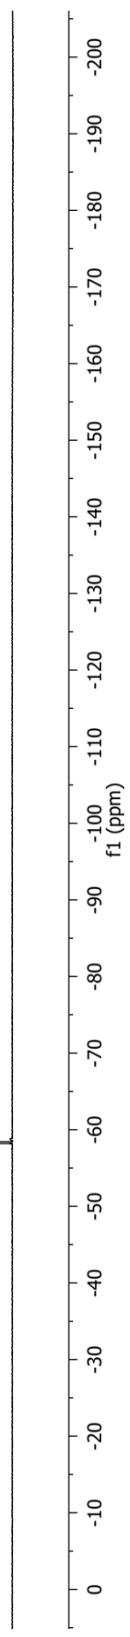

BKD-173-40ME-1H

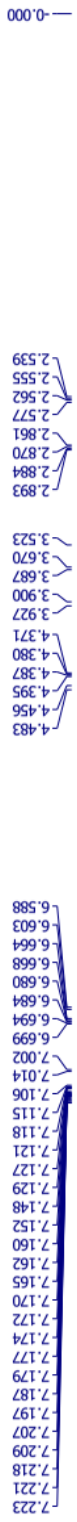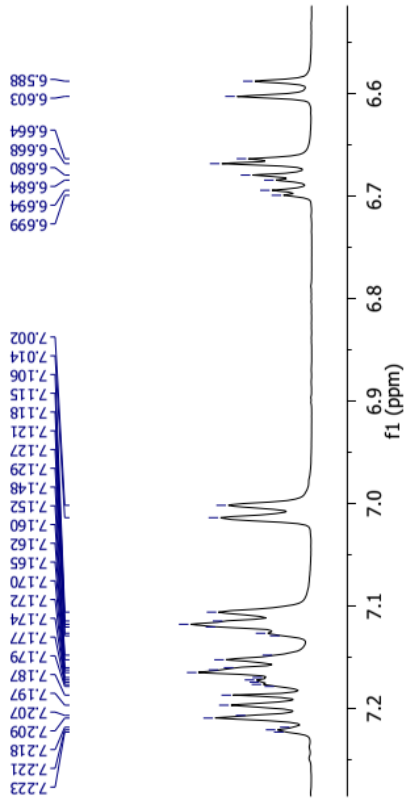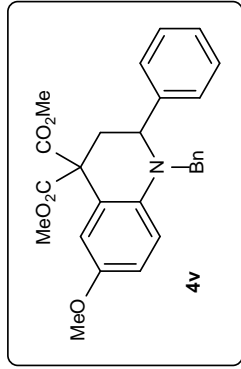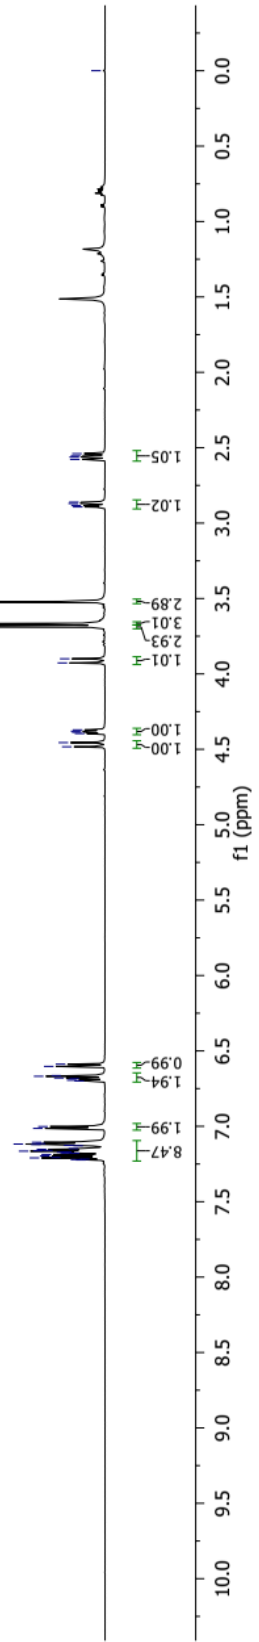



BKD-173-4OME-13C

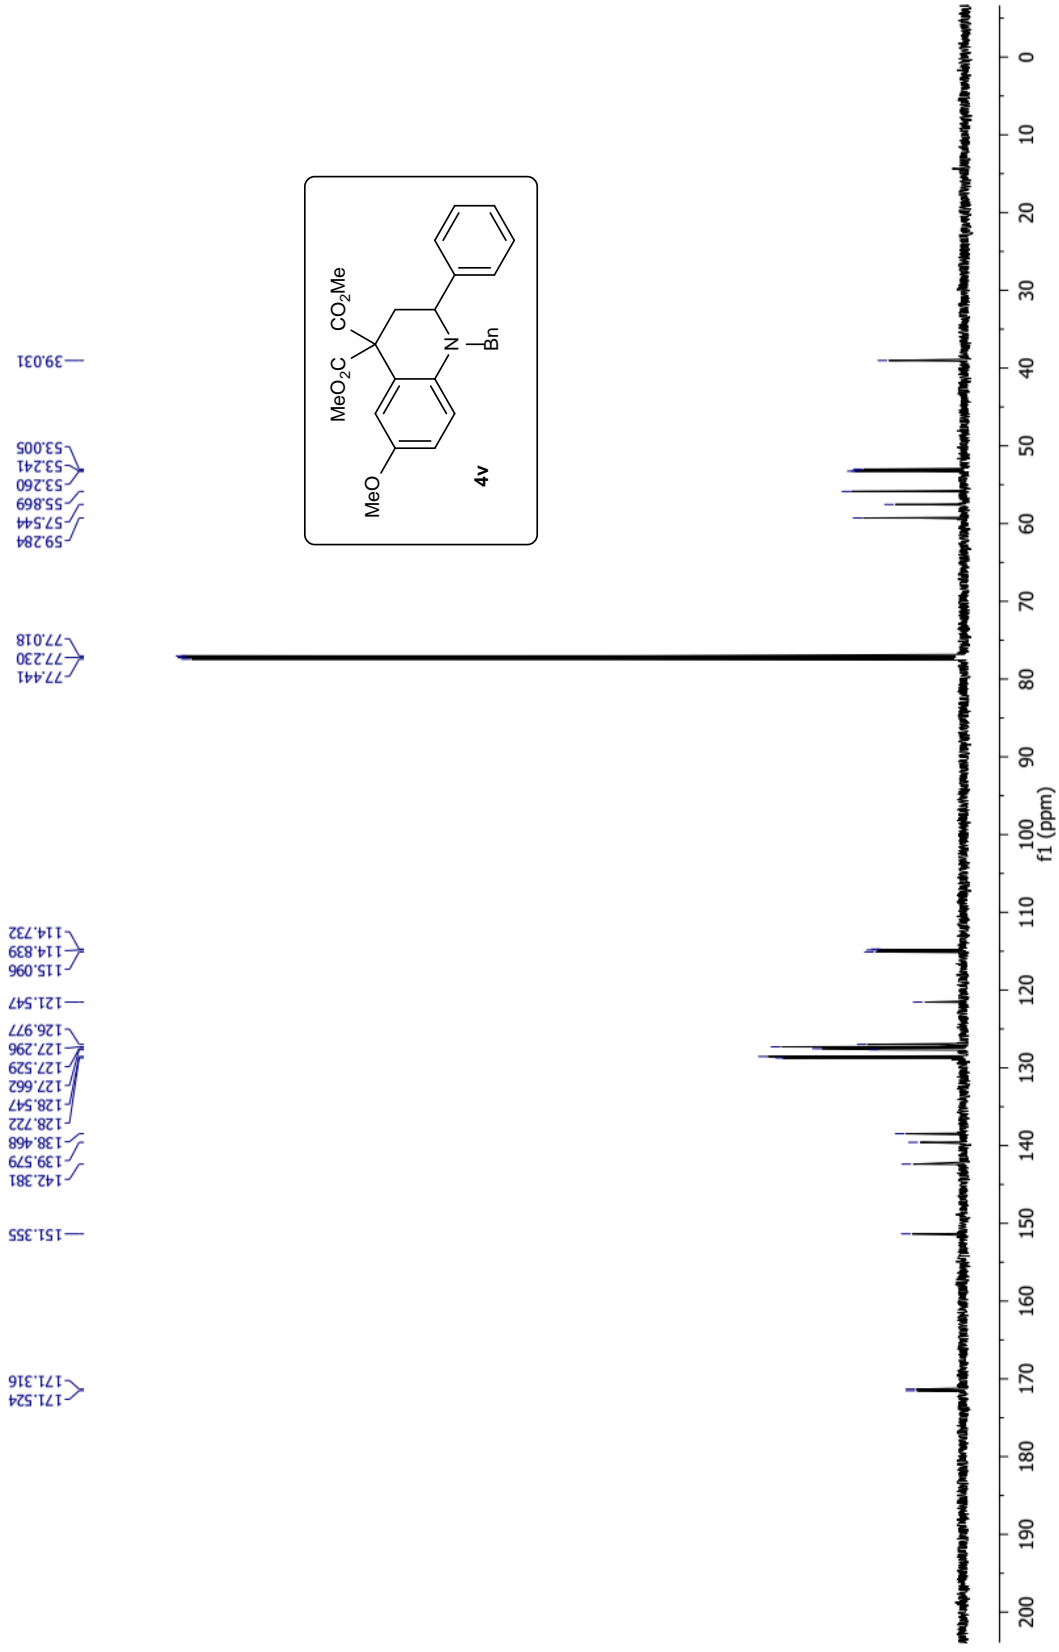

BKD-188-35-ME-1H

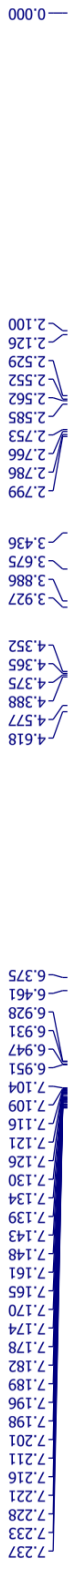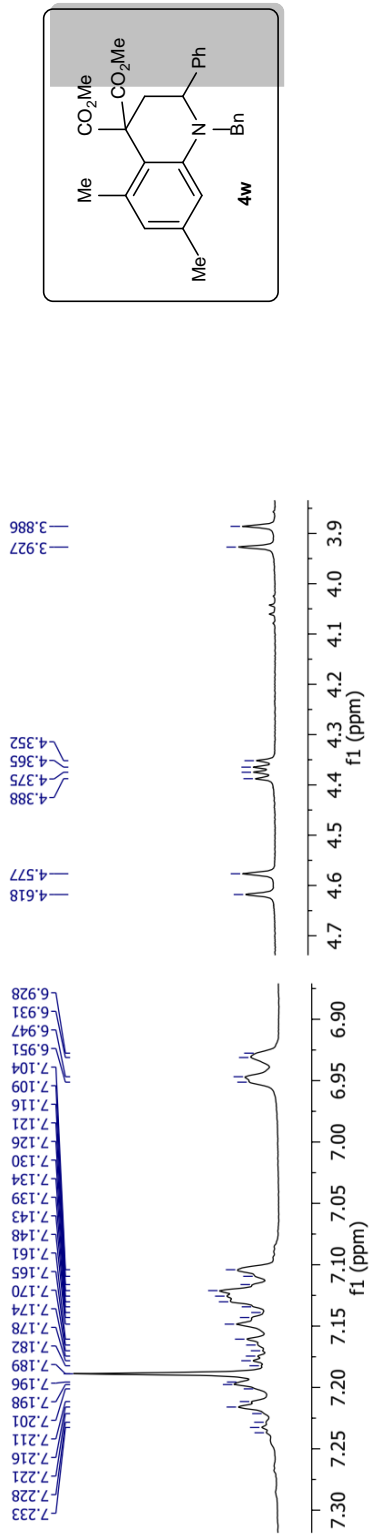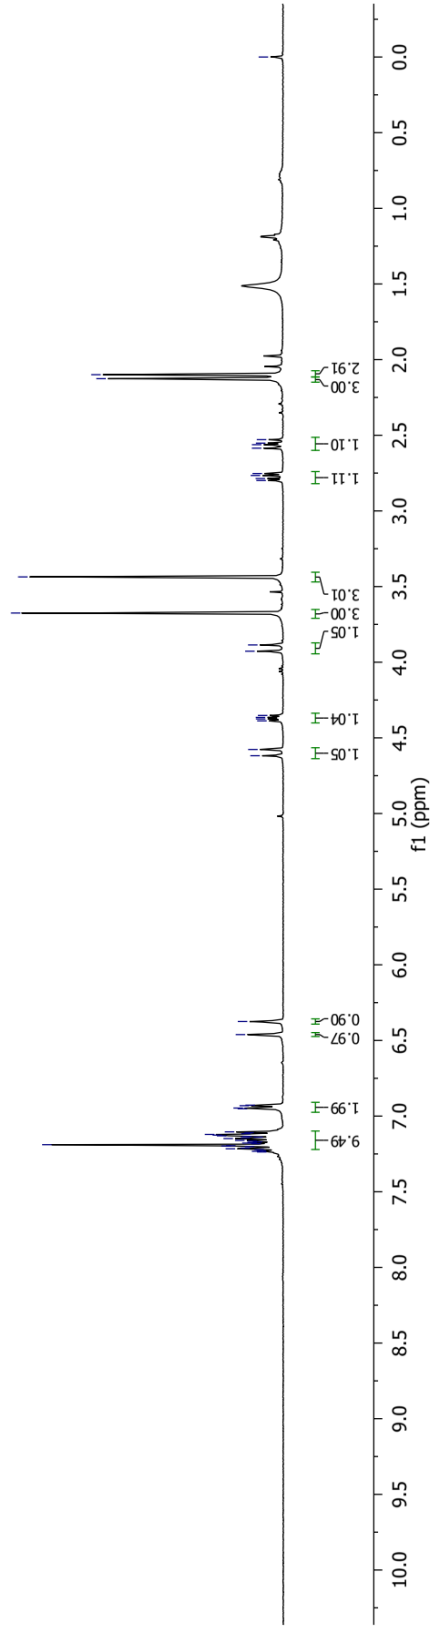

BKD-188-35-ME-13C

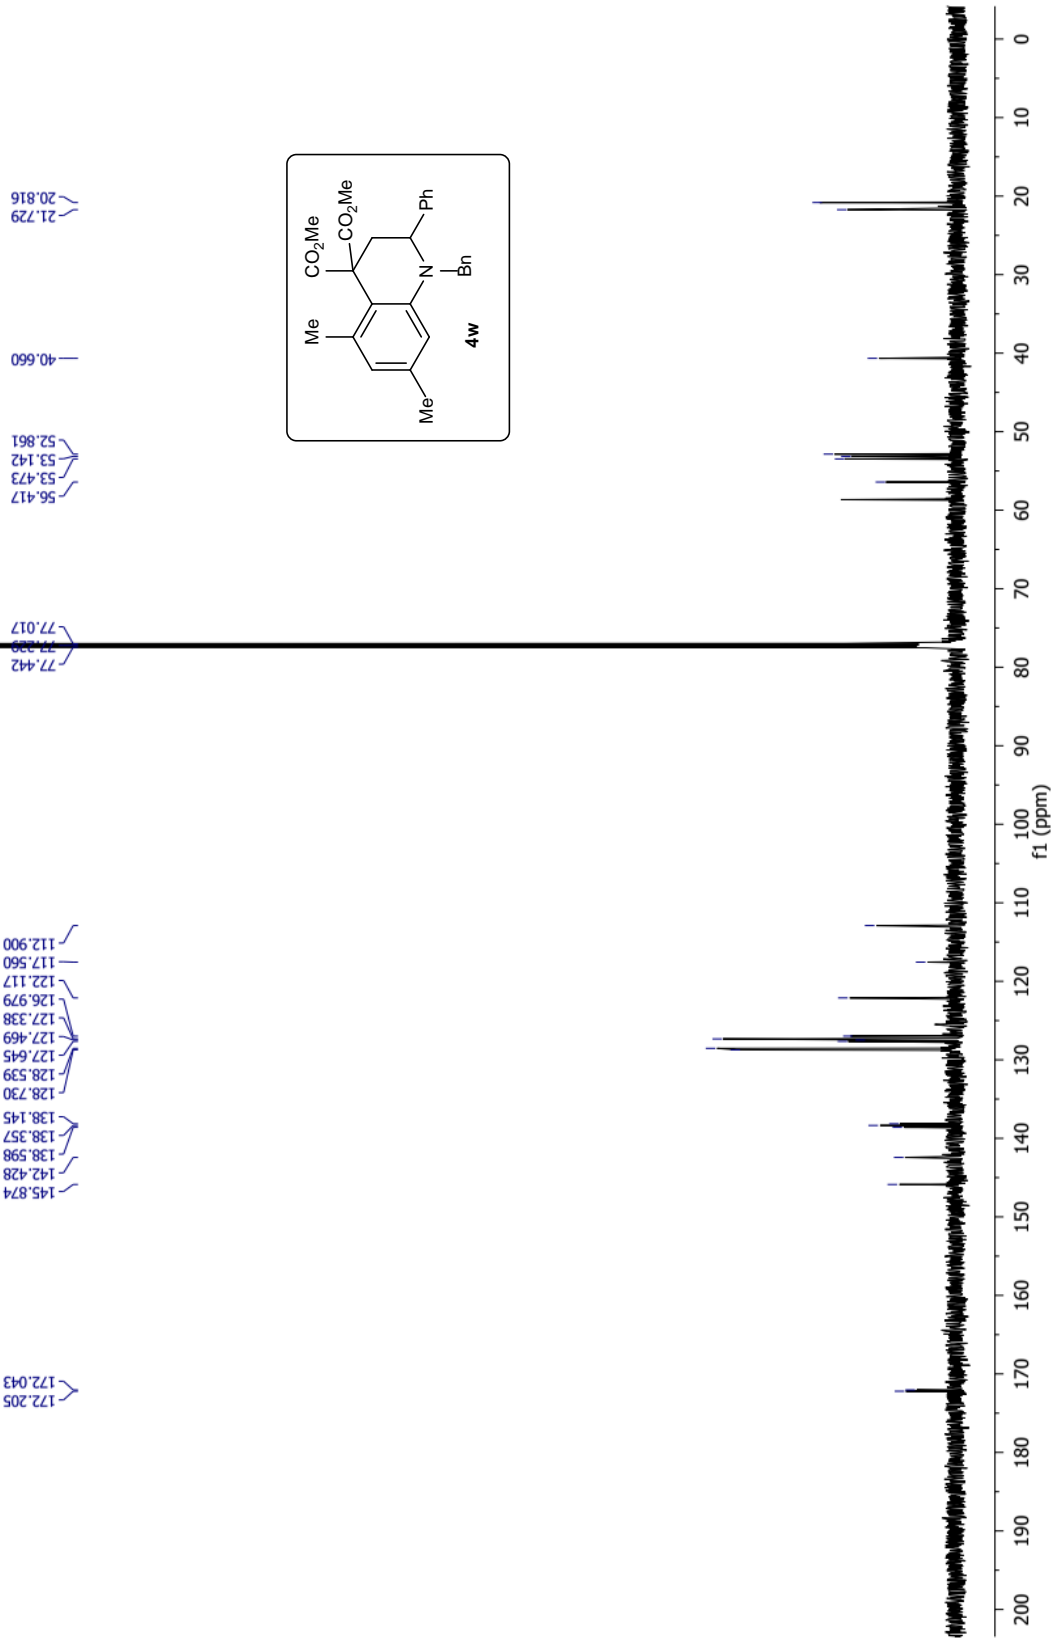

BKD-152-NME-1H

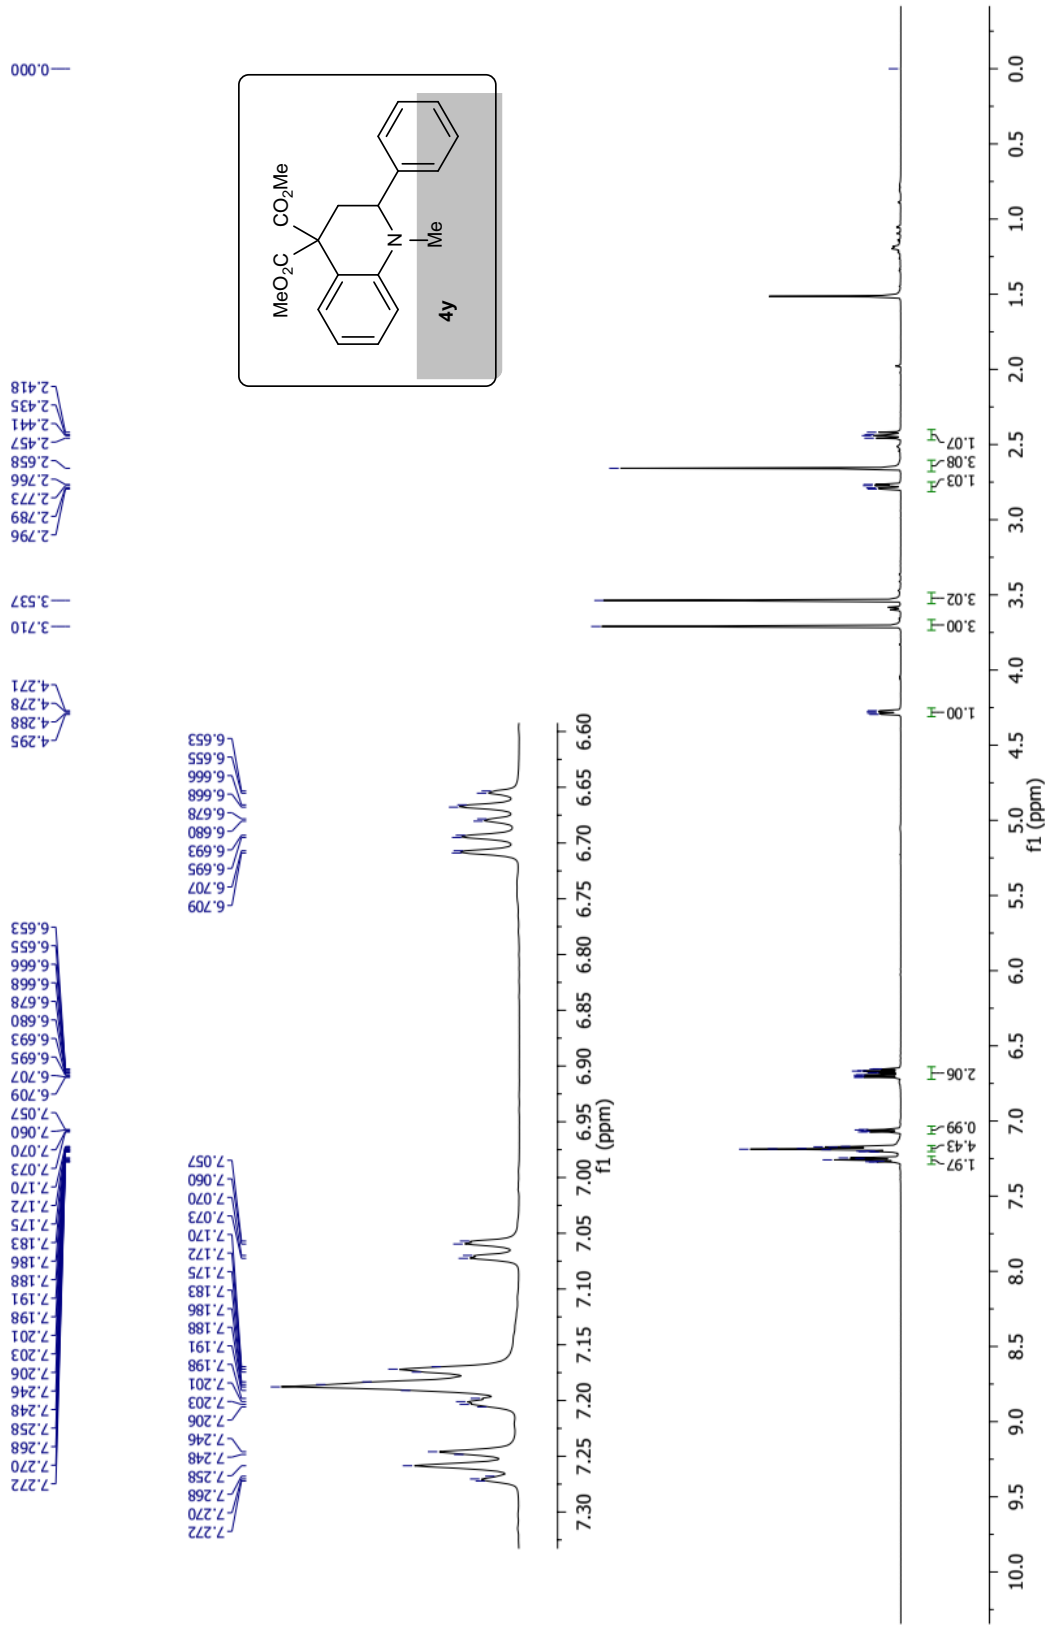

BKD-152-NME-13C

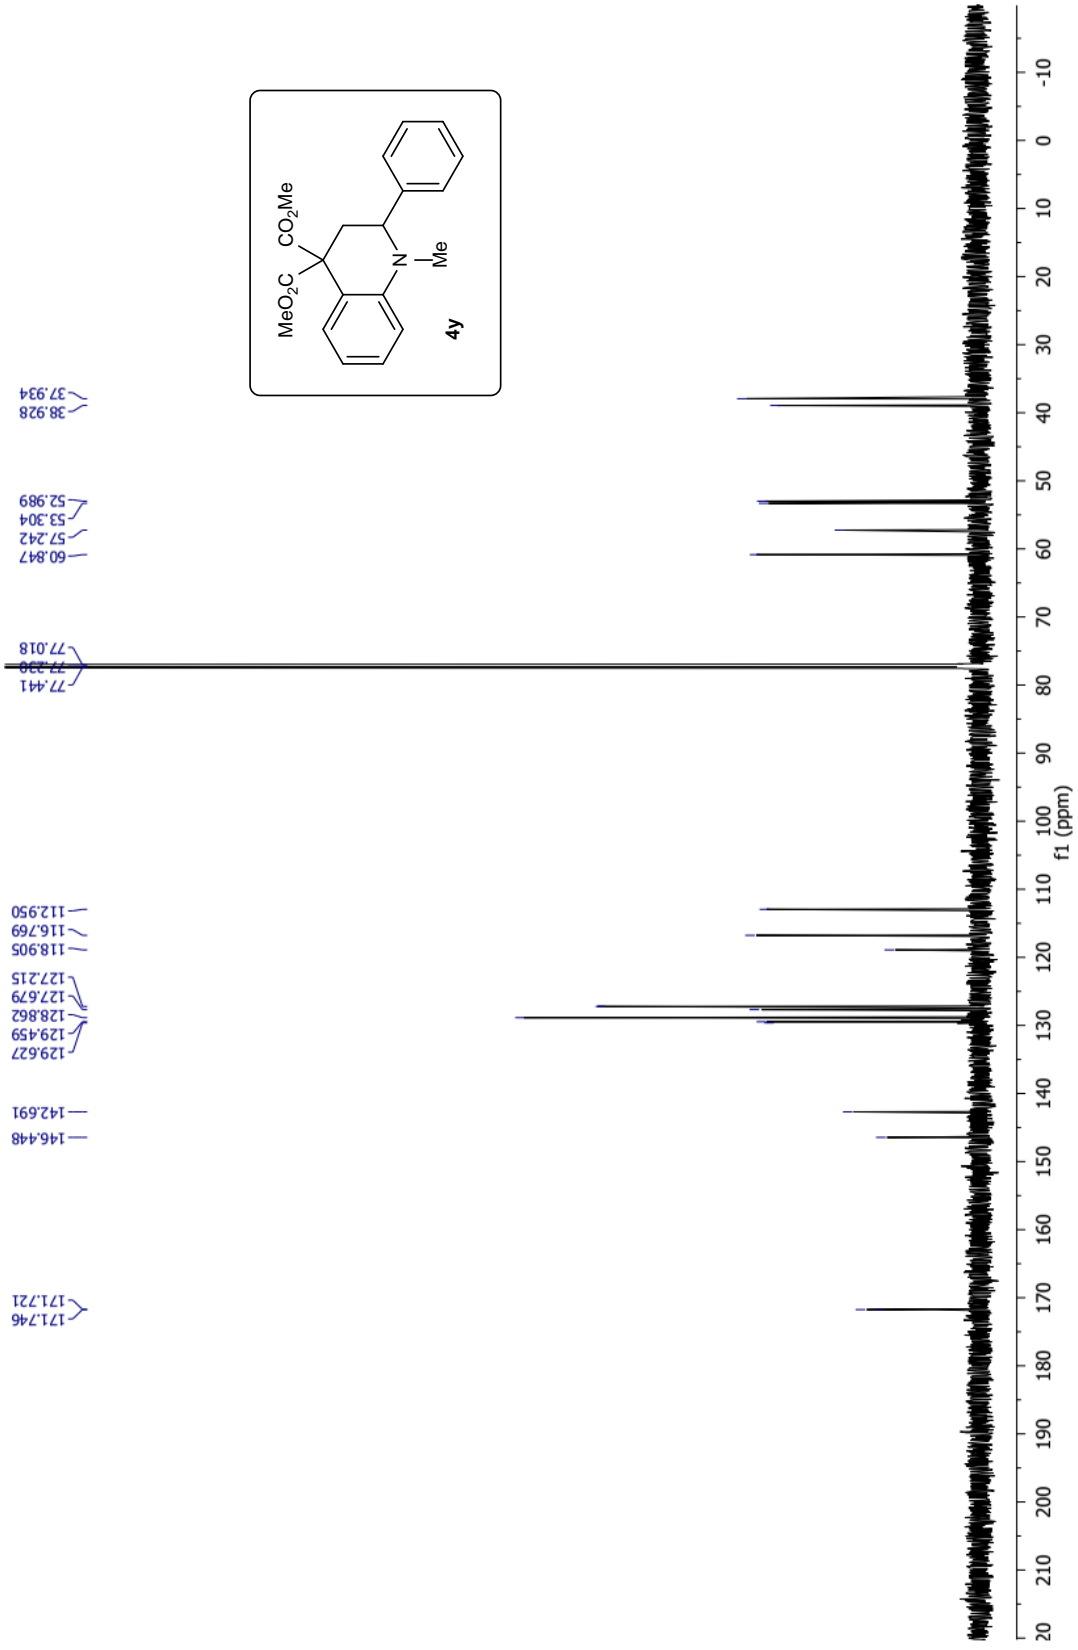

BKD-184-NET-1H

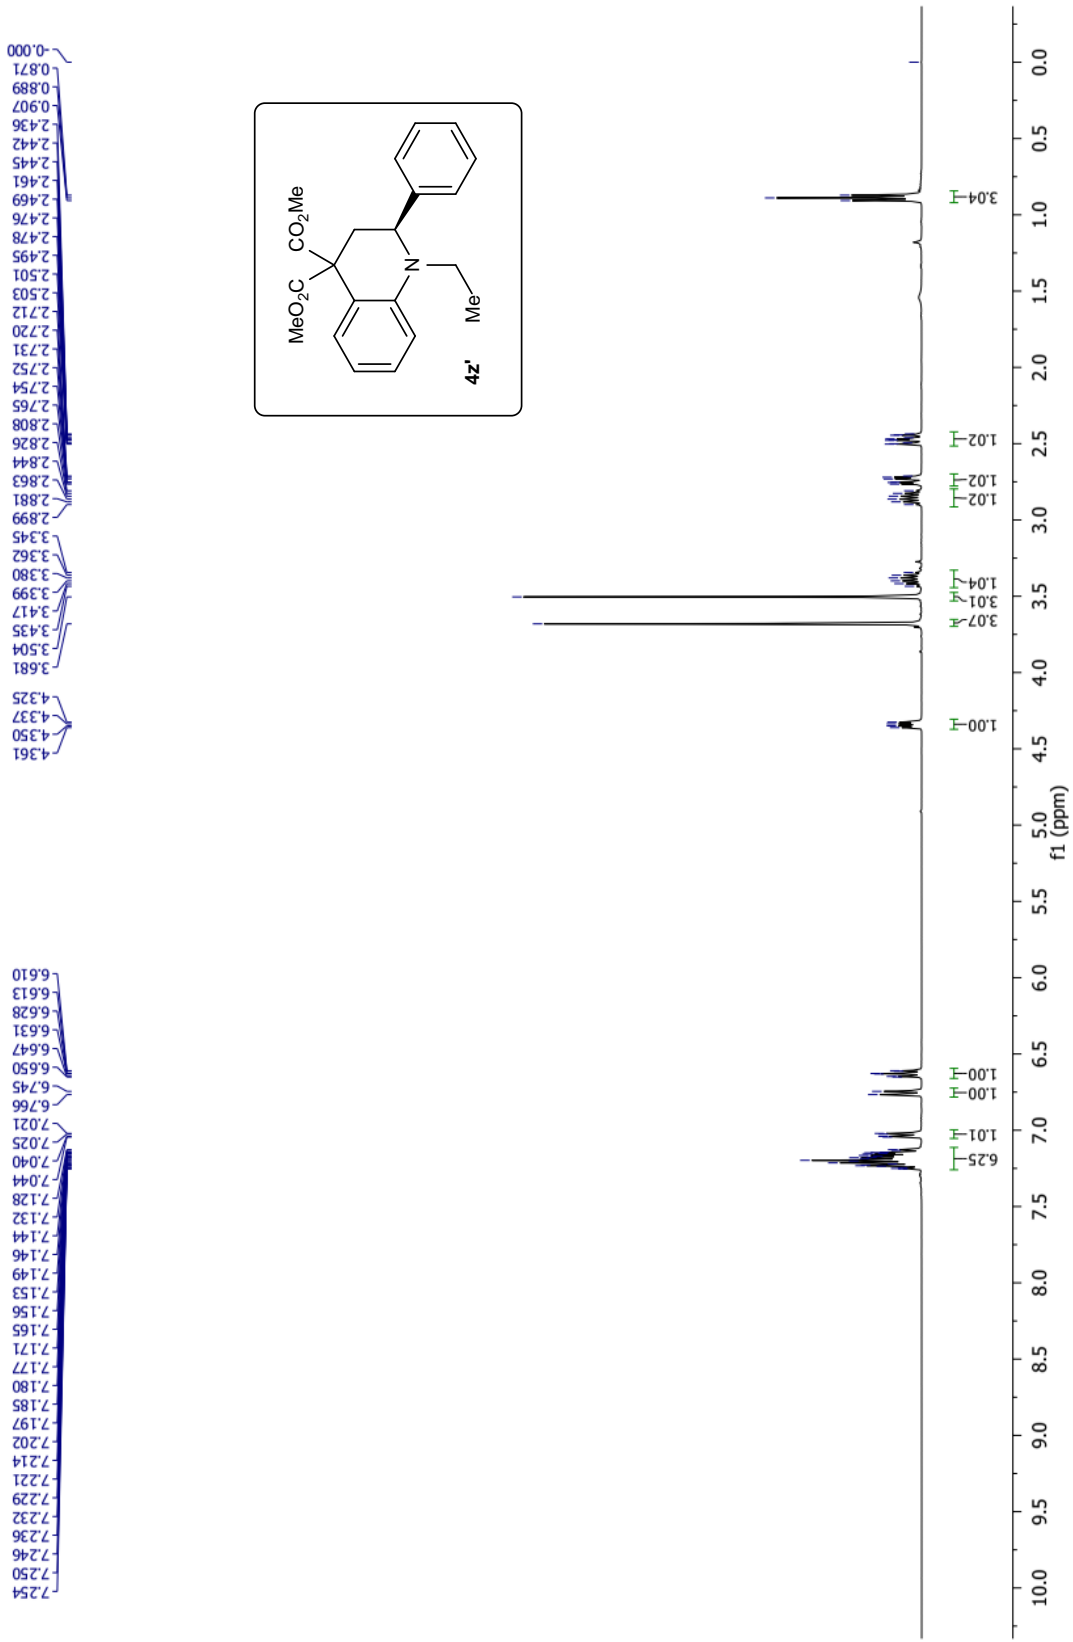

BKD-184-NET-13C

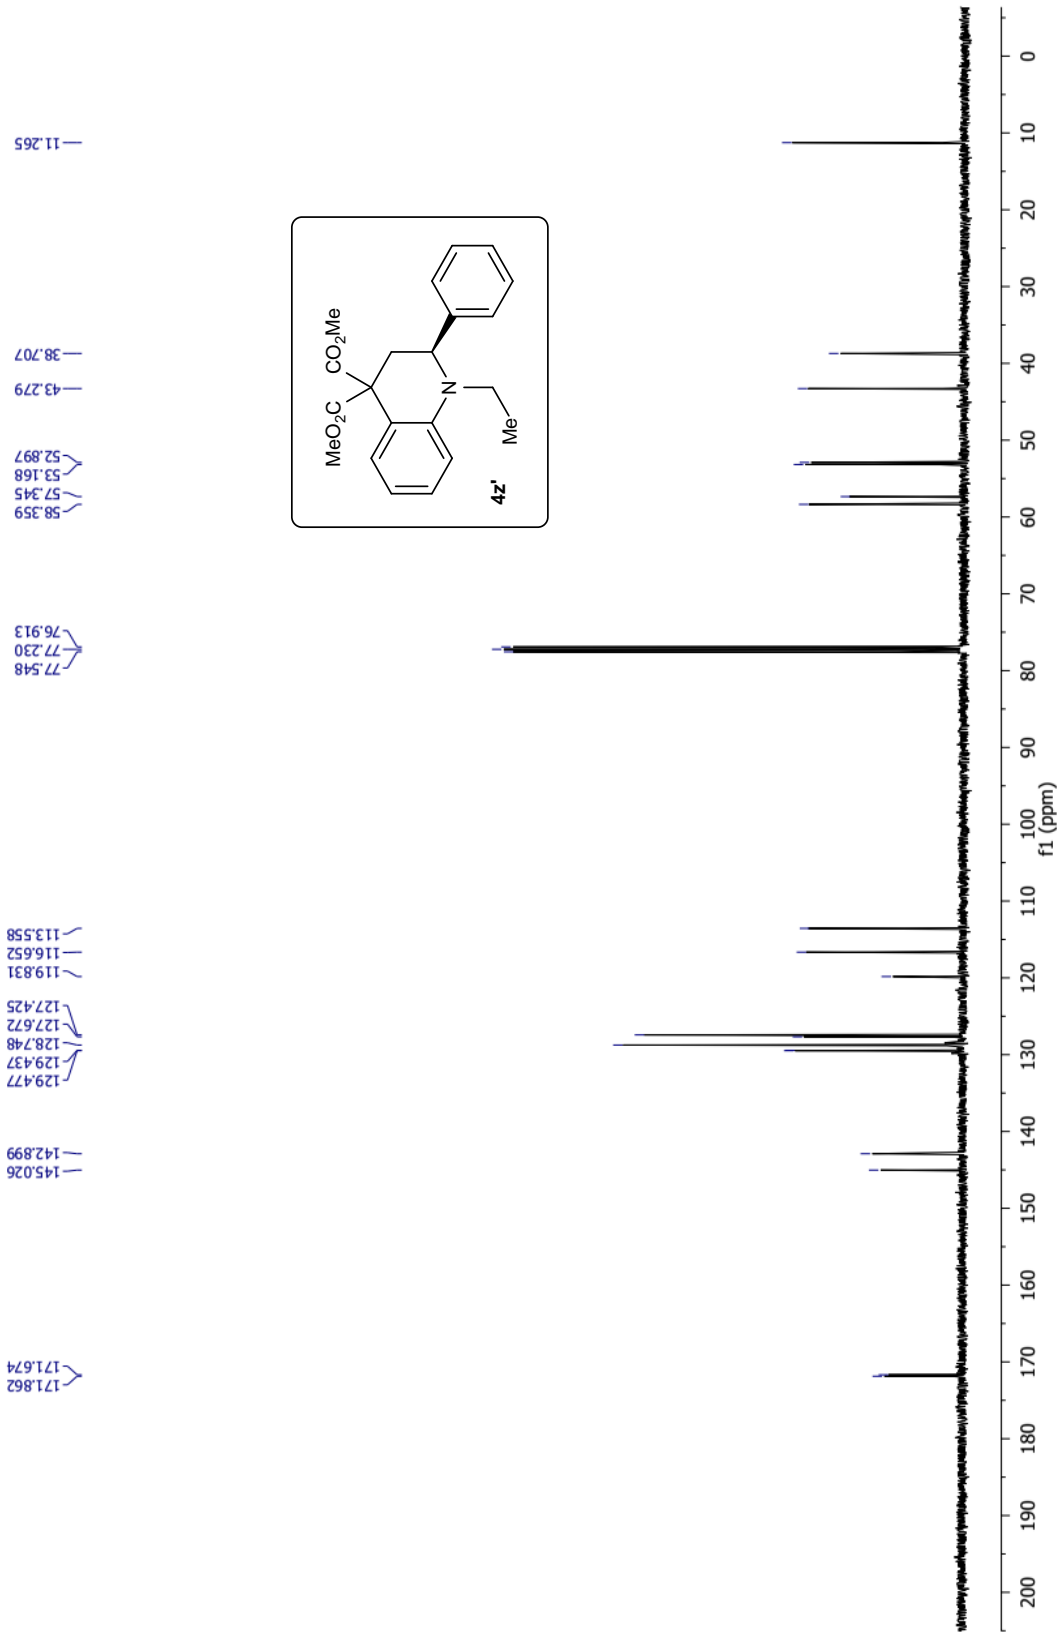





BKD-134-N-CO2ET-13C

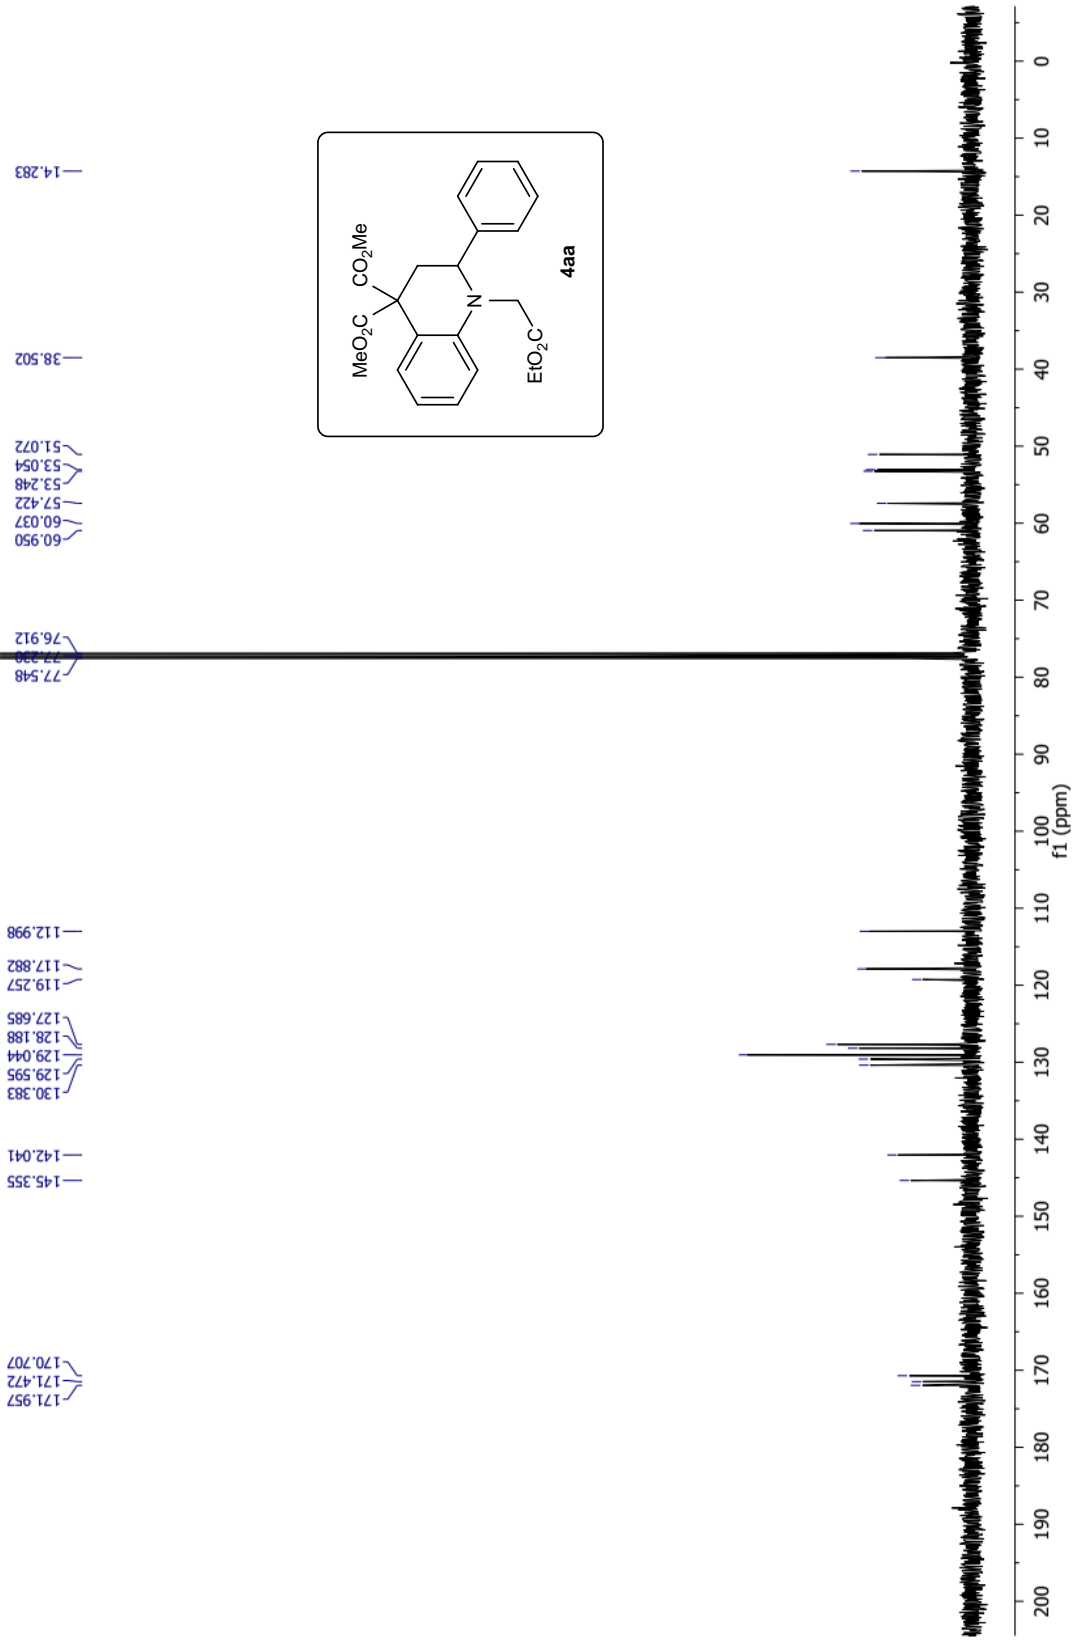

BKD-191-POME-1H

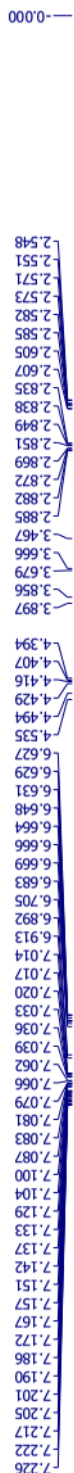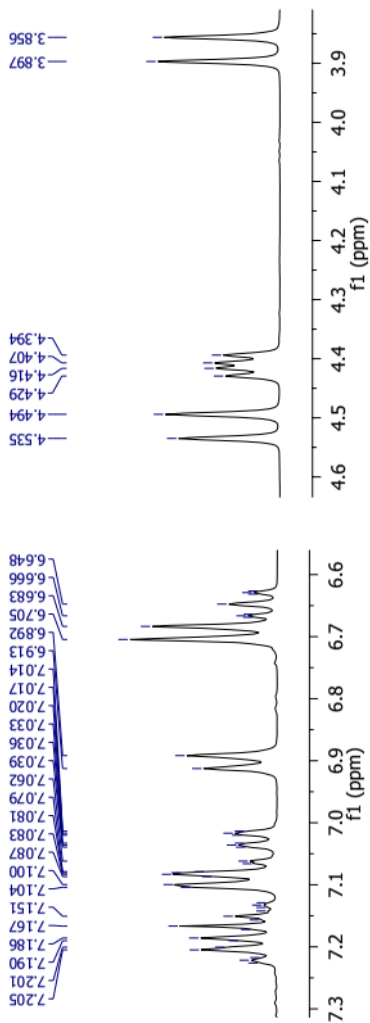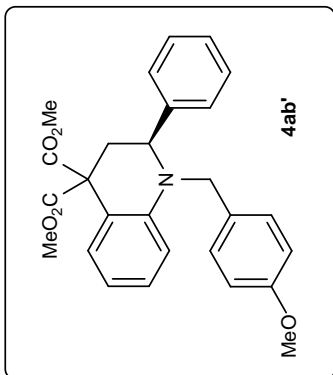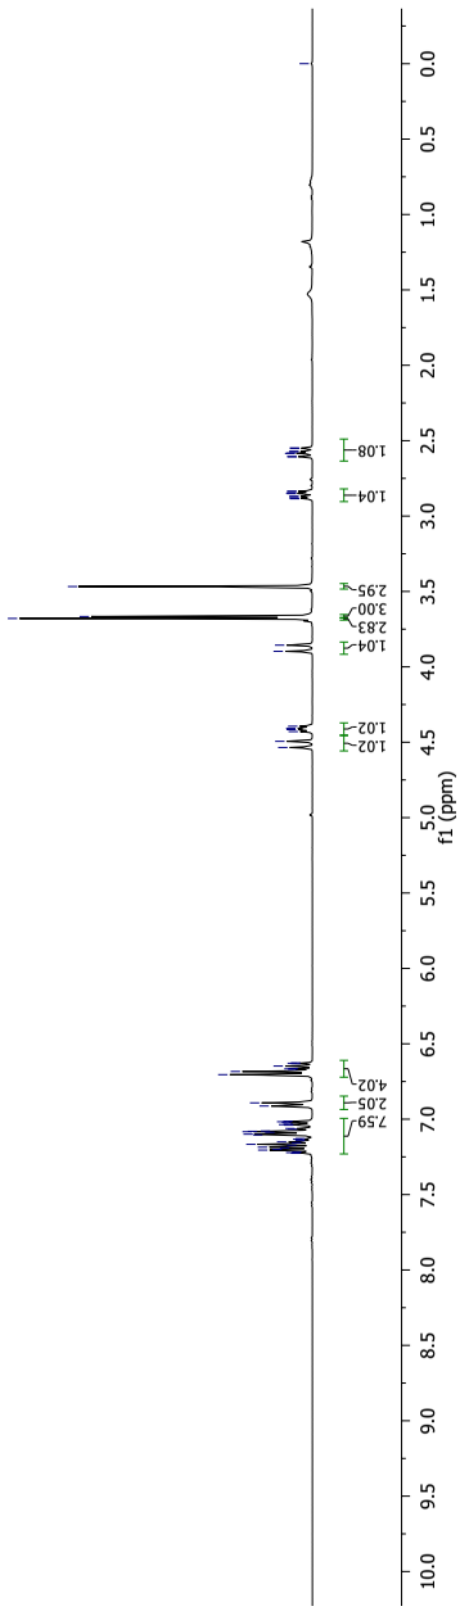

BKD-191-POME-13C

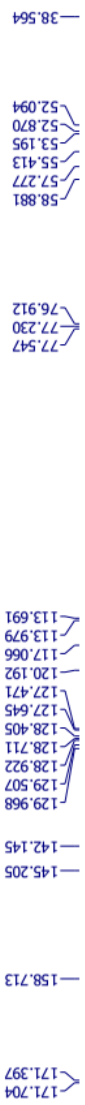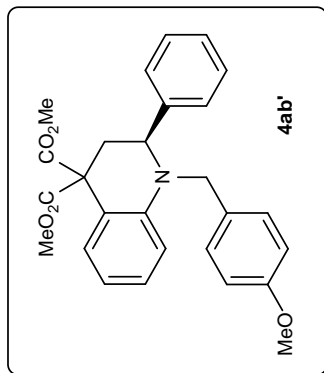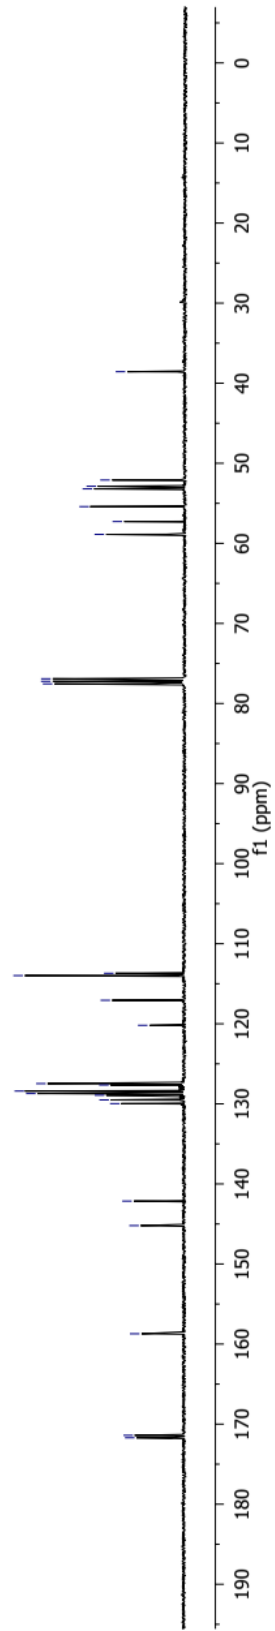



BKD-183-NPH-13C

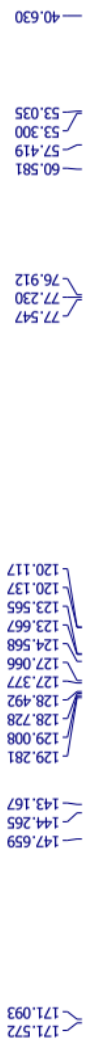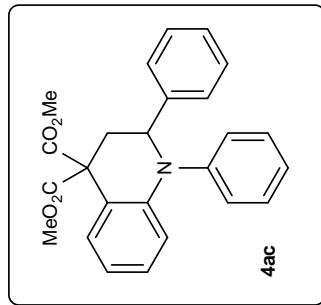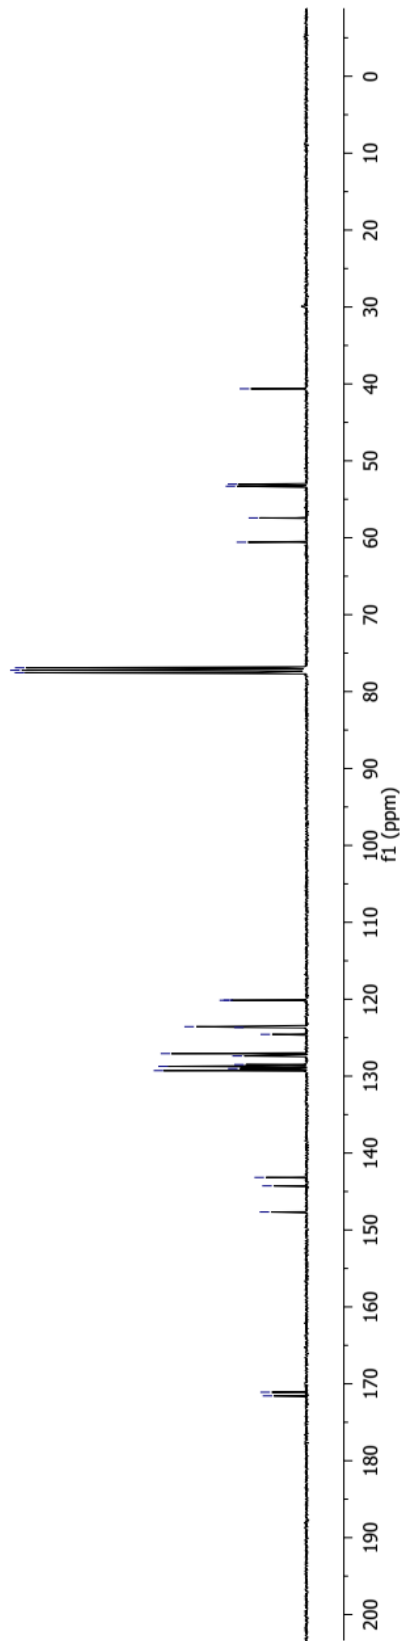

BKD-202-ERM-1H

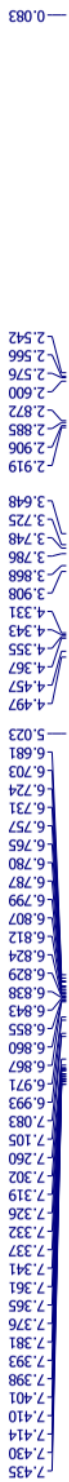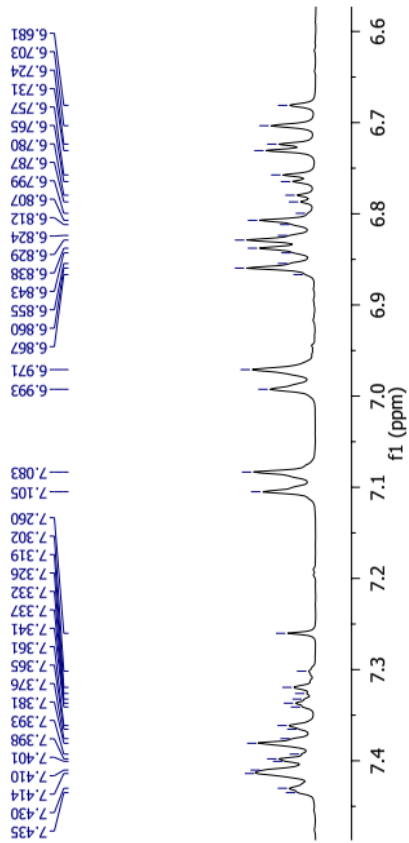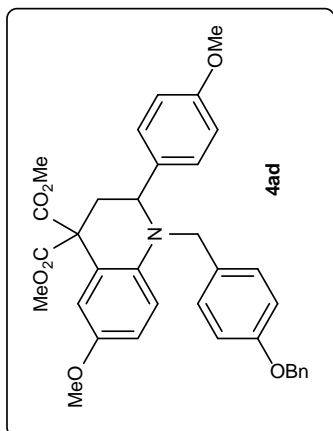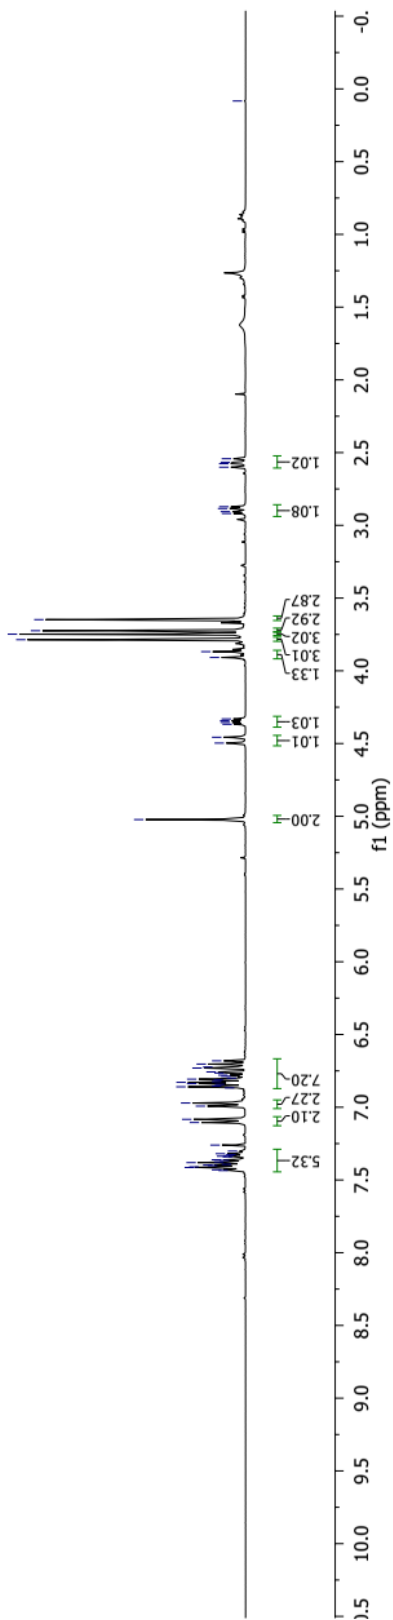

BKD-202-ERM-13C

171.531  
171.418  
159.076  
157.872  
151.340  
139.800  
137.267  
134.412  
130.739  
128.764  
128.632  
128.578  
128.132  
127.674  
121.877  
115.001  
114.954  
114.844  
114.807  
114.053  
77.548  
77.230  
76.913  
70.195  
58.300  
57.717  
55.869  
55.459  
53.180  
53.004  
52.369  
39.351

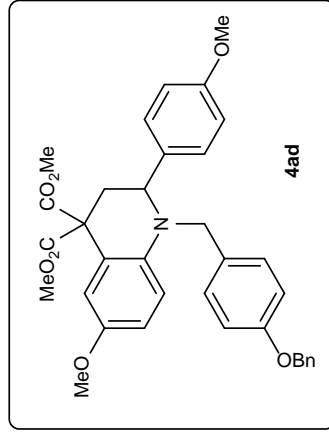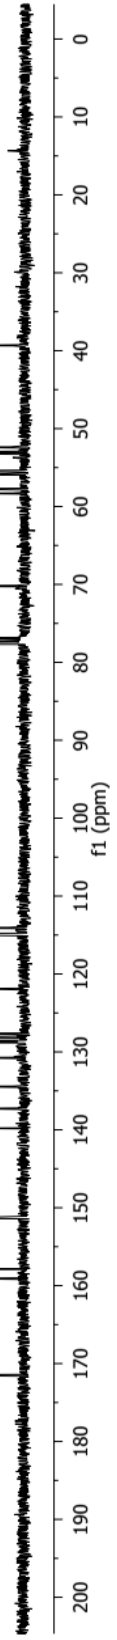

BKD-199-TBU-ISP-1H

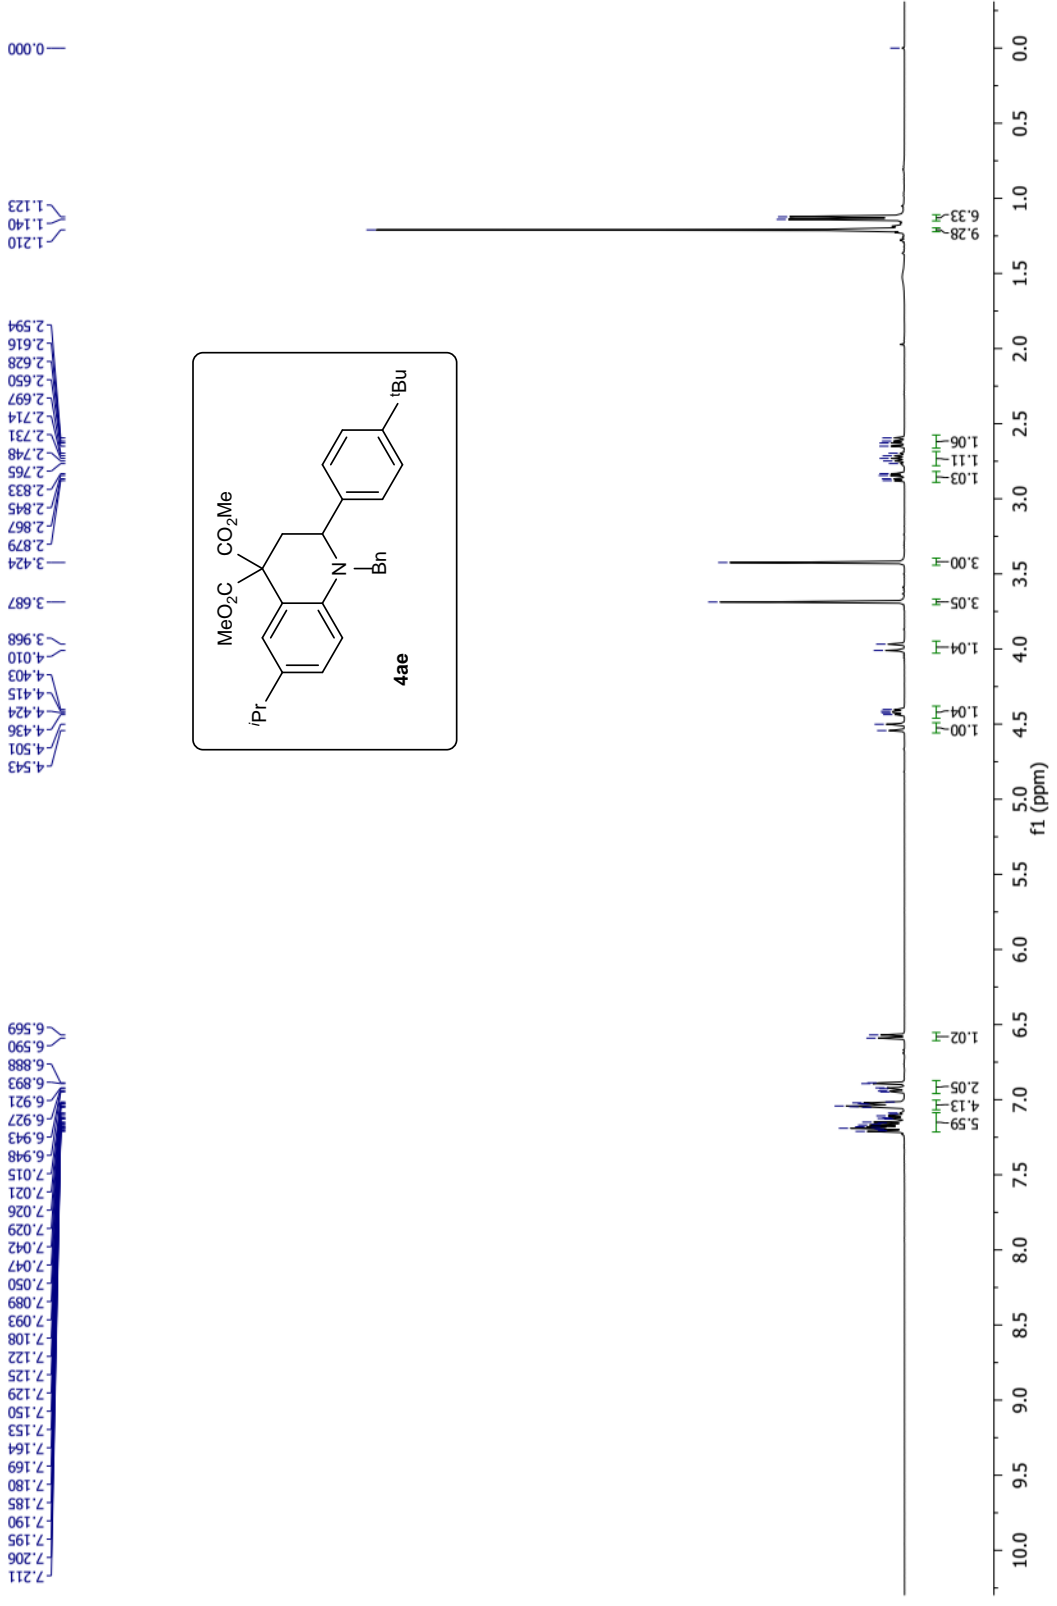



BKD-199-TBU-ISP-13C

171.908  
171.611

150.453  
143.339  
138.990  
138.794  
137.030  
128.546  
127.441  
127.285  
127.236  
127.138  
126.842  
125.509  
119.141  
113.321

77.547  
77.231  
76.913

59.024  
57.320  
53.154  
53.045  
52.720  
38.384  
34.692  
33.125  
31.547  
24.318  
24.280

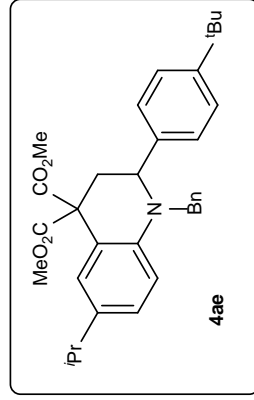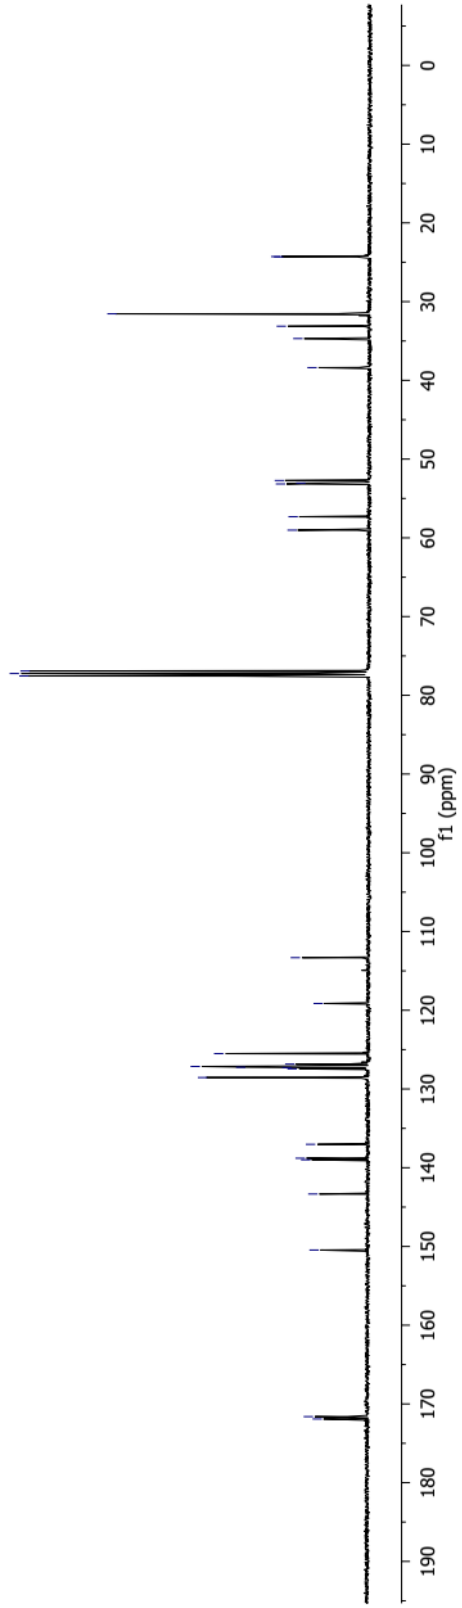

BKD-194-TFA-1H

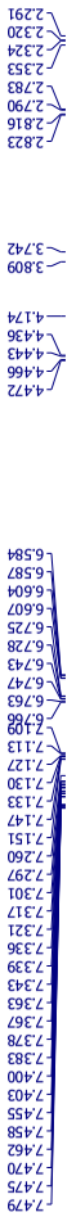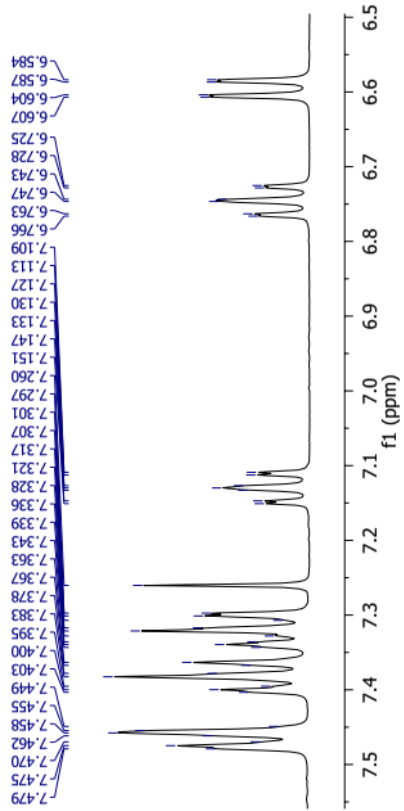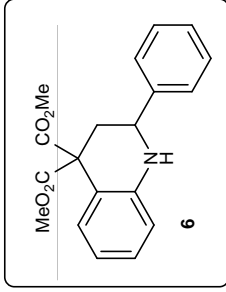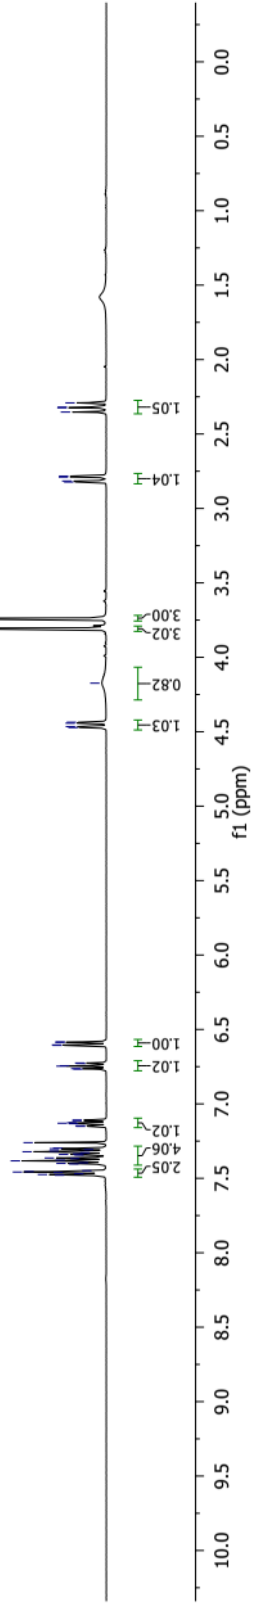

BKD-194-TFA-13C

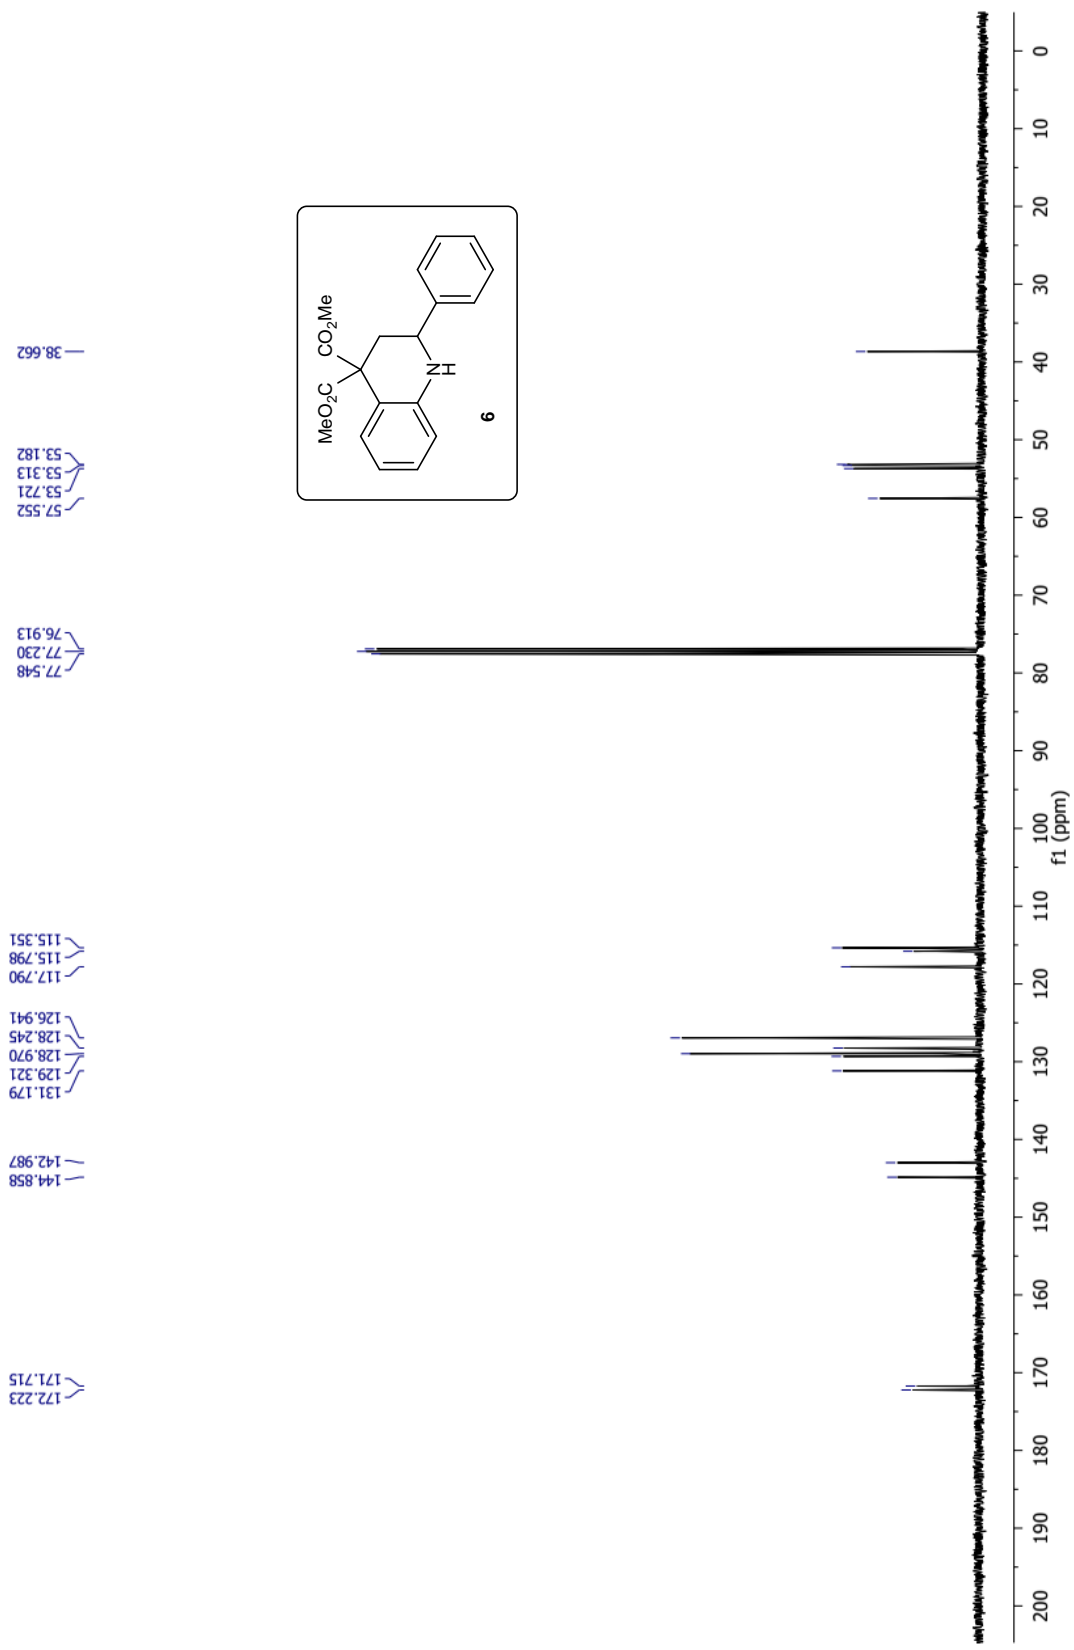



BKD-206-PYR

59.436  
57.266  
53.307  
53.263  
53.038  
38.445

145.232  
142.236  
141.676  
138.232  
137.481  
131.661  
131.125  
130.813  
130.078  
129.711  
129.626  
129.202  
128.705  
128.562  
127.800  
127.768  
127.666  
127.611  
127.198  
127.117  
126.412  
126.223  
125.347  
125.280  
125.115  
125.076  
125.047  
124.852  
119.684  
117.234  
113.693  
77.441  
77.229  
77.017

171.532  
171.745

145.232  
142.236  
141.676  
138.232  
137.481  
131.661  
131.125  
130.813  
130.078  
129.711  
129.626  
129.202  
128.705  
128.562  
127.800  
127.768  
127.666  
127.611  
127.198  
127.117  
126.412  
126.223  
125.347  
125.280  
125.115  
125.076  
125.047  
124.852  
119.684  
117.234  
113.693

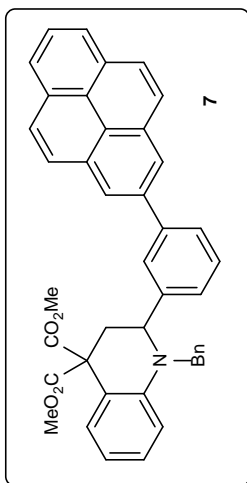

48 146 144 142 140 138 136 134 132 130 128 126 124 122 120 118 116 114 112  
f1 (ppm)

190 180 170 160 150 140 130 120 110 100 90 80 70 60 50 40 30 20 10 0  
f1 (ppm)

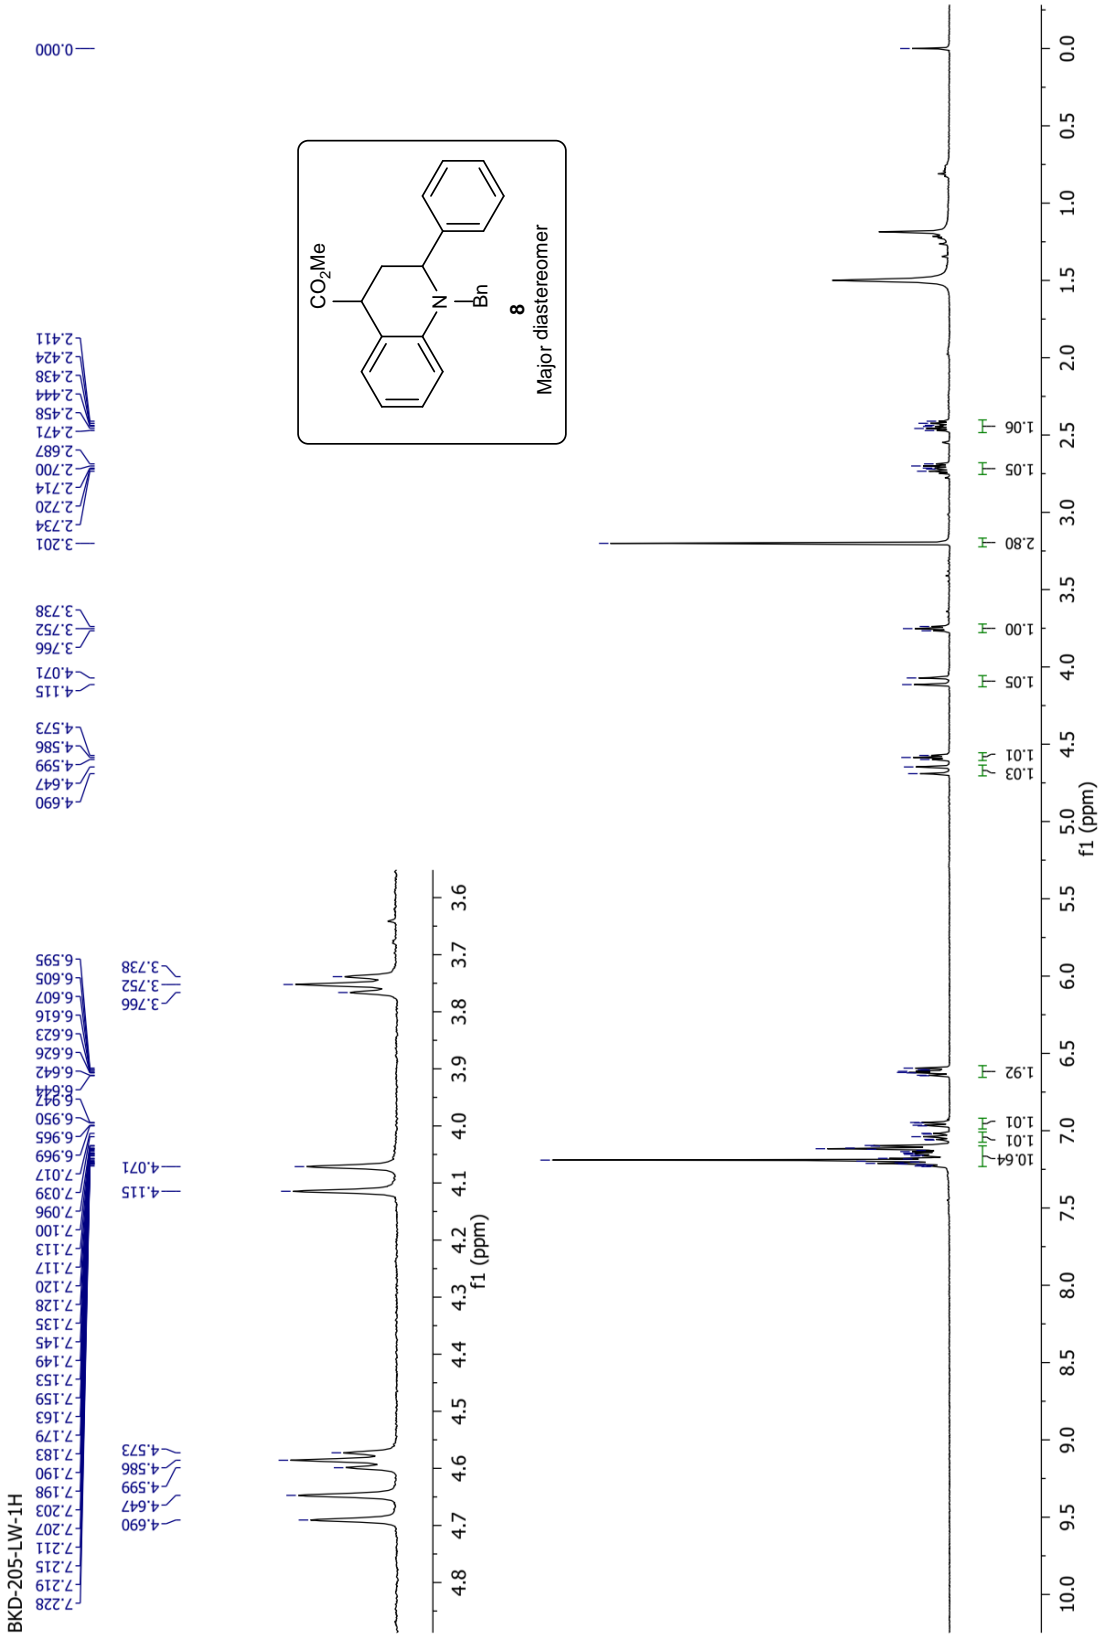

BKD-205-LW-13C

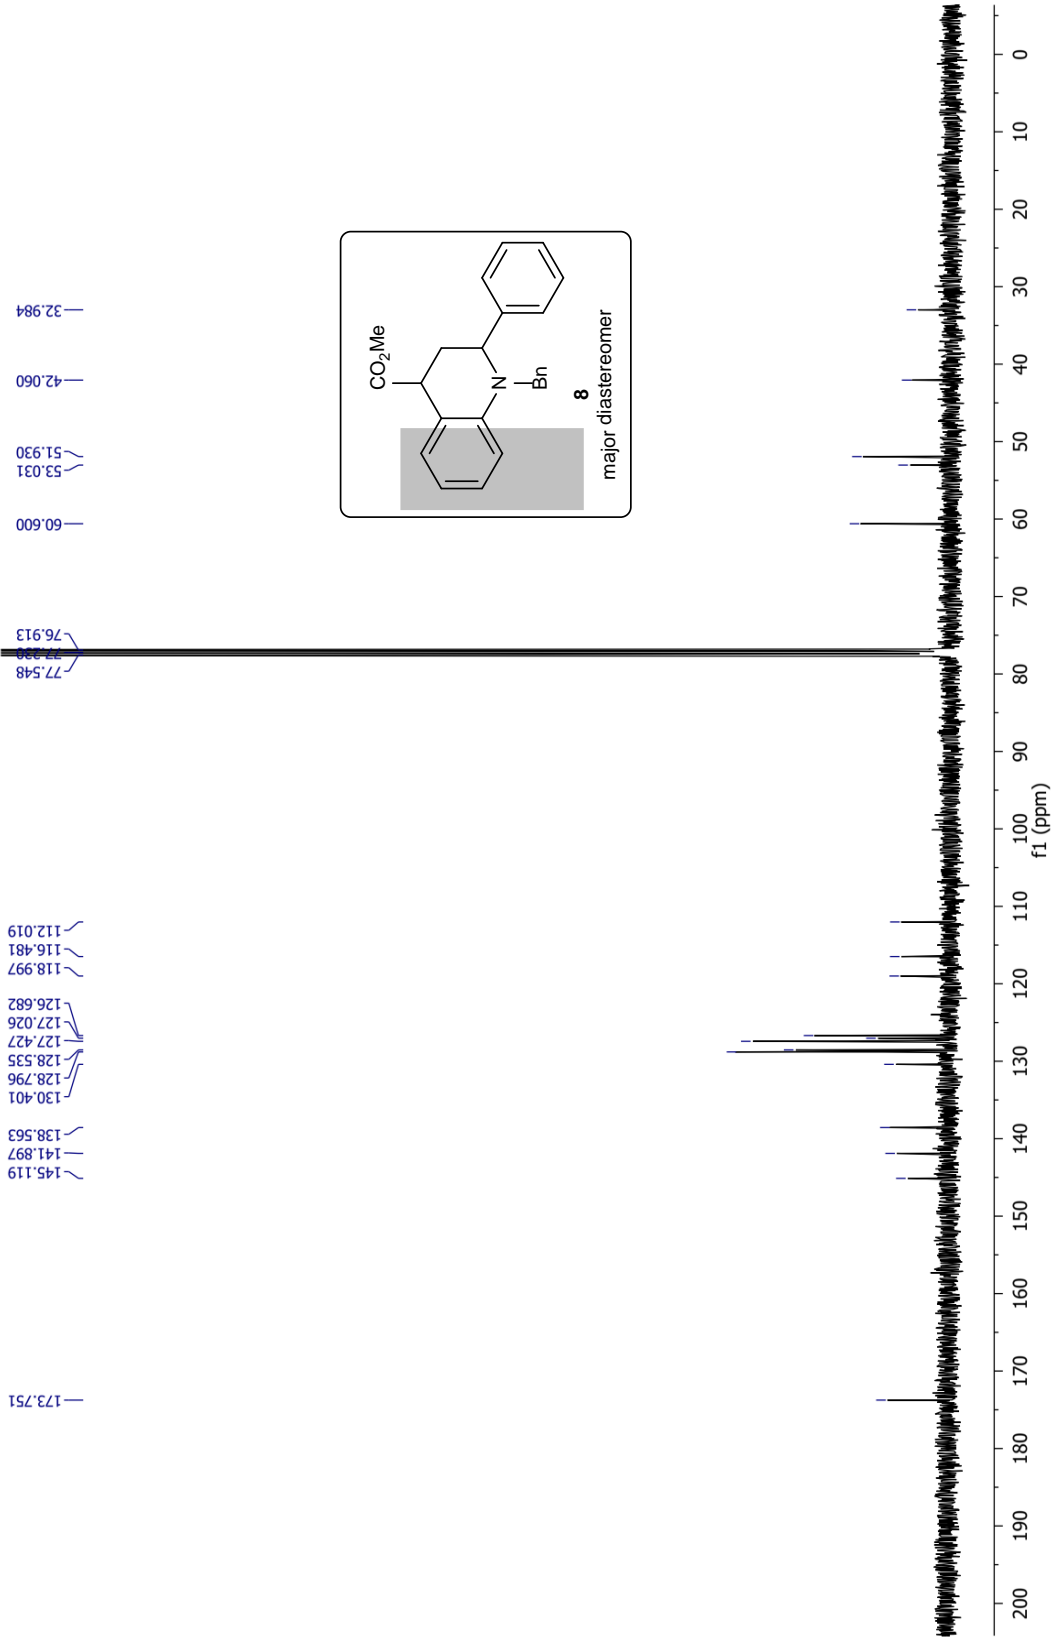

BKD-205-LCL-UP-1H

7.256  
7.244  
7.238  
7.231  
7.226  
7.213  
7.206  
7.193  
7.182  
7.168  
7.156  
7.145  
7.135  
7.123  
7.121  
7.109  
7.101  
7.028  
7.017  
7.005  
7.002  
6.992  
6.939  
6.603  
6.590  
6.578  
6.559  
6.545

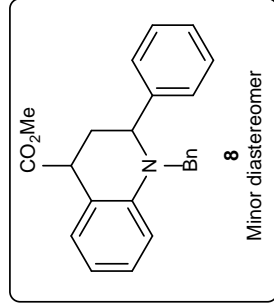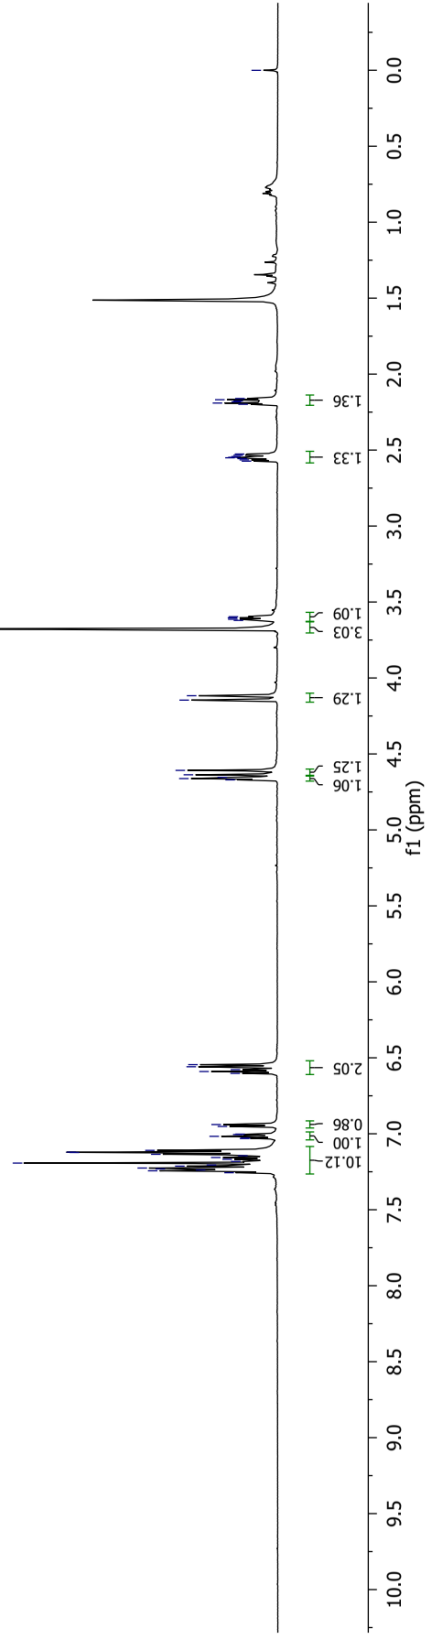



BKD-205-LCL-13C

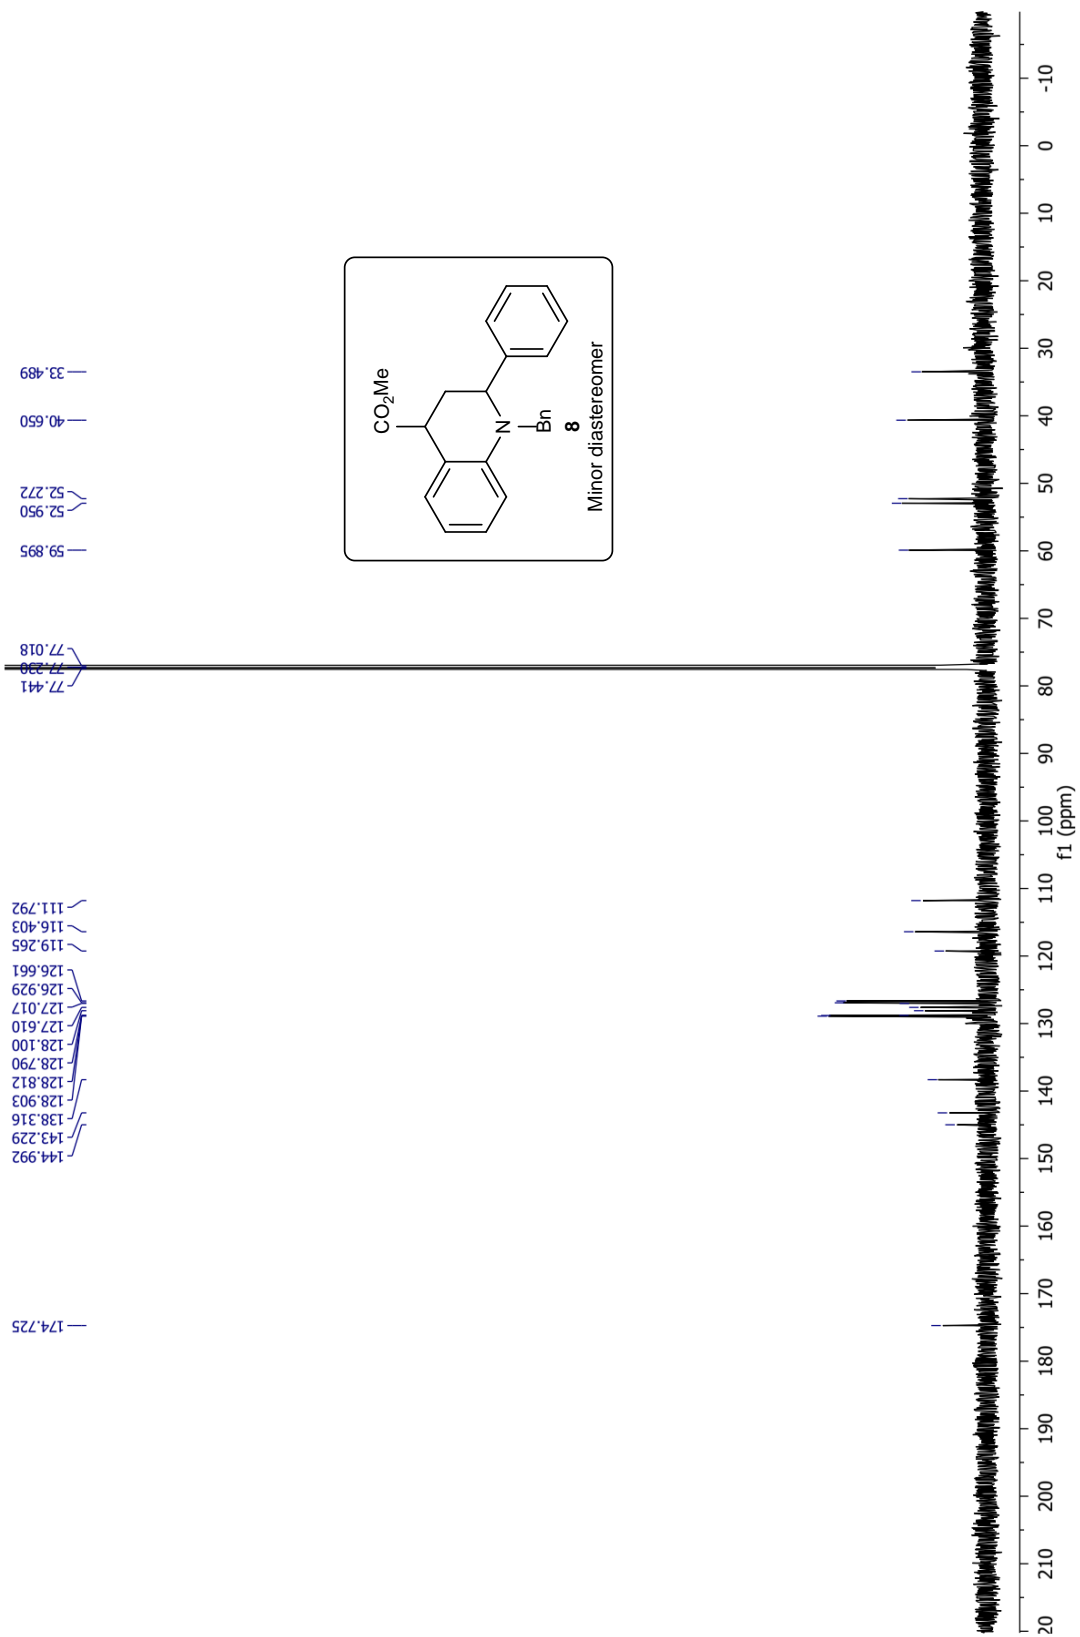

Supplement: c9cc04042k1.pdf [file c9cc04042k1.pdf]
